# Supplementary material
Source: PubMed Central journal article supplement (PMC7082718)
Supplement: NIHMS1572406-supplement-supplementary_information.pdf [file NIHMS1572406-supplement-supplementary_information.pdf]

Supporting Information for:

Towards Automatic and Comprehensive Glycan Characterization by On-line PGC-

LC-EED MS/MS

Juan Wei,<sup>1</sup> Yang Tang,<sup>1,2</sup> Yu Bai,<sup>3</sup> Joseph Zaia,<sup>1</sup> Catherine E. Costello,<sup>1,2</sup> Pengyu Hong,<sup>4</sup> Cheng

Lin<sup>1,\*</sup>

1. Center for Biomedical Mass Spectrometry, Boston University School of Medicine, Boston, MA 02118, United States

2. Department of Chemistry, Boston University, Boston, MA 02215, United States

3. Beijing National Laboratory for Molecular Sciences, Institute of Analytical Chemistry, College of Chemistry and Molecular Engineering, Peking University, Beijing, 100871, China

4. Department of Computer Science, Brandeis University, Waltham, MA 02454, United States

\* Corresponding author:

Cheng Lin

Center for Biomedical Mass Spectrometry

Boston University School of Medicine

670 Albany Street, Room 508

Boston, MA 02118

Tel: 617-638-6705

Fax: 617-638-6761

E-mail: [chenglin@bu.edu](mailto:chenglin@bu.edu)

## Table of Contents

|                                         |           |
|-----------------------------------------|-----------|
| Manual deduction of putative structures | Page S-3  |
| Figure S-1                              | Page S-6  |
| Figure S-2                              | Page S-7  |
| Figure S-3                              | Page S-8  |
| Figure S-4                              | Page S-9  |
| Figure S-5                              | Page S-10 |
| Scheme S-1                              | Page S-11 |
| Scheme S-2                              | Page S-11 |
| Table S-1                               | Page S-12 |
| Table S-2                               | Page S-13 |
| Table S-3                               | Page S-16 |
| Table S-4                               | Page S-19 |
| Table S-5                               | Page S-25 |
| Table S-6                               | Page S-27 |
| Table S-7                               | Page S-30 |
| Table S-8                               | Page S-33 |
| Table S-9                               | Page S-37 |
| Table S-10                              | Page S-39 |
| Table S-11                              | Page S-41 |
| Table S-12                              | Page S-44 |
| Table S-13                              | Page S-46 |
| Table S-14                              | Page S-49 |
| Table S-15                              | Page S-51 |
| Table S-16                              | Page S-53 |
| Table S-17                              | Page S-55 |
| Table S-18                              | Page S-57 |
| Table S-19                              | Page S-60 |

### ***Manual determination of Man4, Man6, Man8, and Man9 putative structures***

Three chromatographic peaks are observed for Man4 isomers (Figure 1a), with their EED spectra shown in Figure S1. For isomer 1, the presence of a series of C-2H, or C<sup>‡</sup> ions, including C<sub>1</sub><sup>‡</sup> (Hex<sub>1</sub>), C<sub>2</sub><sup>‡</sup> (Hex<sub>2</sub>), C<sub>3</sub><sup>‡</sup> (Hex<sub>3</sub>), C<sub>4</sub><sup>‡</sup> (Hex<sub>4</sub>), suggests a linear tri-mannose chain attached to the R0 residue. Further, the absence of <sup>0,4</sup>A and <sup>3,5</sup>A ions suggests that the trisaccharide is located at the 3-antenna, thus establishing the structure of isomer 1 as 4A<sub>3</sub>B<sub>3</sub>. For isomer 2, observed C ions include C<sub>1α</sub><sup>‡</sup> (Hex), C<sub>2α</sub><sup>‡</sup> (Hex<sub>3</sub>), and C<sub>3</sub><sup>‡</sup> (Hex<sub>4</sub>), but not C (Hex<sub>2</sub>), and this indicates a branched tri-mannose antenna attached to the core mannose. Branched sub-structure can only exist at the 6-antenna, an assignment that is also supported by the presence of <sup>0,4</sup>A<sub>2</sub>, <sup>3,5</sup>A<sub>2</sub>, and <sup>3,5</sup>A<sub>3</sub> ions. Thus isomer 2 can be assigned as 4A<sub>1,2</sub>. For isomer 3, observed C ions included C<sub>1α</sub><sup>‡</sup> (Hex<sub>1</sub>), C<sub>2α</sub><sup>‡</sup> (Hex<sub>2</sub>), and C<sub>3</sub><sup>‡</sup> (Hex<sub>4</sub>), but not C (Hex<sub>3</sub>), and this establishes a branched topology with two antennae consisting of one and two mannose residues, respectively. The observation of <sup>0,4</sup>A<sub>2α</sub>, <sup>3,5</sup>A<sub>2α</sub>, <sup>0,4</sup>A<sub>3</sub>, and <sup>3,5</sup>A<sub>3</sub> ions may be used to establish the di-mannose branch as a 1→6-linked disaccharide at the 6-antenna, and the structure of isomer 3 as 4A<sub>1</sub>.

Three chromatographic peaks are observed for Man6 isomers (Figure 1c), with their EED spectra shown in Figure S2. For the major Man6 isomer, or isomer 1, the presence of <sup>0,4</sup>A<sub>3</sub> and <sup>3,5</sup>A<sub>3</sub> ions at *m/z* 709.325 and 737.357 suggests a tri-mannose 6-antenna, and a di-mannose 3-antenna. Further, the presence of <sup>0,4</sup>A<sub>2α</sub> and <sup>3,5</sup>A<sub>2α</sub> ions at *m/z* 301.126 and 329.157 indicates that the 6-antenna consists of a branched tri-mannose, thus establishing its structure as 6A<sub>1,2,3</sub>. For the two minor Man6 isomers, isomer 2 and isomer 3, the presence of a <sup>3,5</sup>A<sub>4</sub> ion at *m/z* 941.456 suggests a tetra-mannose 6-antenna and a mono-mannose 3-antenna. The C6 substituent of the R6 residue may be determined as a di-mannose for isomer 2, based on the presence of <sup>0,4</sup>A<sub>3α</sub> and <sup>3,5</sup>A<sub>3α</sub> ions at *m/z* 505.226 and 533.257, and as a single mannose residue for isomer 3, based on the presence

of  $^{0,4}A_{2\alpha}$  and  $^{3,5}A_{2\alpha}$  ions at  $m/z$  301.126 and 329.157. Thus, isomers 2 and 3 may be assigned as  $6A_{1,2}B_1$  and  $6A_{1,2}B_2$ , respectively.

Three chromatographic peaks are observed for Man8 isomers (Figure 1e), with their EED spectra shown in Figure S3. For the major isomer, isomer 3, the observation of a  $^{3,5}A_4$  ion at  $m/z$  1145.556 establishes a penta-mannose 6-antenna, and a di-mannose 3-antenna. Further, the presence of  $^{0,4}A_{3\alpha}$  and  $^{3,5}A_{3\alpha}$  ions at  $m/z$  505.226 and 533.257 suggests that the 6-antenna consists of two di-mannose branches attached to the R6 residue. Thus, isomer 3 can be assigned as  $8A_{1,2,3}B_{1,2}$ . For the two minor Man8 isomers, isomer 1 and isomer 2, the presence of  $^{0,4}A_4$  and  $^{3,5}A_4$  ions at  $m/z$  913.425 and 941.456 suggests a tetra-mannose 6-antenna and a di-mannose 3-antenna. The C6 substituent of the R6 residue may be determined as a single mannose residue for isomer 1, based on the presence of  $^{0,4}A_{2\alpha}$  and  $^{3,5}A_{2\alpha}$  ions at  $m/z$  301.126 and 329.157, and as a di-mannose for isomer 2, based on the presence of  $^{0,4}A_{3\alpha}$  and  $^{3,5}A_{3\alpha}$  ions at  $m/z$  505.226 and 533.257. Thus, isomers 1 and 2 may be assigned as  $8A_{1,2,3}B_{2,3}$  and  $8A_{1,2,3}B_{1,3}$ , respectively.

Only one chromatographic peak was observed for Man9 (Figure 1f), with its EED spectrum shown in Figure S4. The presence of  $^{0,4}A_4$  and  $^{3,5}A_4$  ions at  $m/z$  1117.524 and 1145.555 establishes a penta-hexose branch at the 6-antenna and a tri-hexose branch at the 3-antenna (also supported by the presence of a  $C_4/Z_{3\beta}$  ion at  $m/z$  1247.588 and a  $^{1,3}A_4$  ion at  $m/z$  723.340). The presence of a  $C_{3\alpha}/Z_{4\alpha}$  ion at  $m/z$  635.288 is consistent with a 6-antenna consisting of two di-hexose branches, with one located at the C3 position, and the other at the C6 position based on the observation of  $^{0,4}A_3$  and  $^{3,5}A_3$  ions at  $m/z$  505.225 and 533.257. Thus, the Man9 structure may be assigned as  $9A_{1,2,3}B_{1,2,3}$ . Note that eight different Man9 structures in five different topologies (Topologies A to E, Figure S5a) may be produced from the tetradecameric *N*-glycan precursor. Here, GlycoDeNovo was able to identify  $9A_{1,2,3}B_{1,2,3}$  (Topology A, Figure S5a, or Topology 2,

Figure S5b) as the only one among the top-ranked candidate topologies (Topologies 1 to 5, Figure S5b) based on the observed C-ion series with compositions of Hex, Hex<sub>2</sub>, Hex<sub>3</sub>, Hex<sub>5</sub>, Hex<sub>9</sub>, and Hex<sub>9</sub>HexNAc.

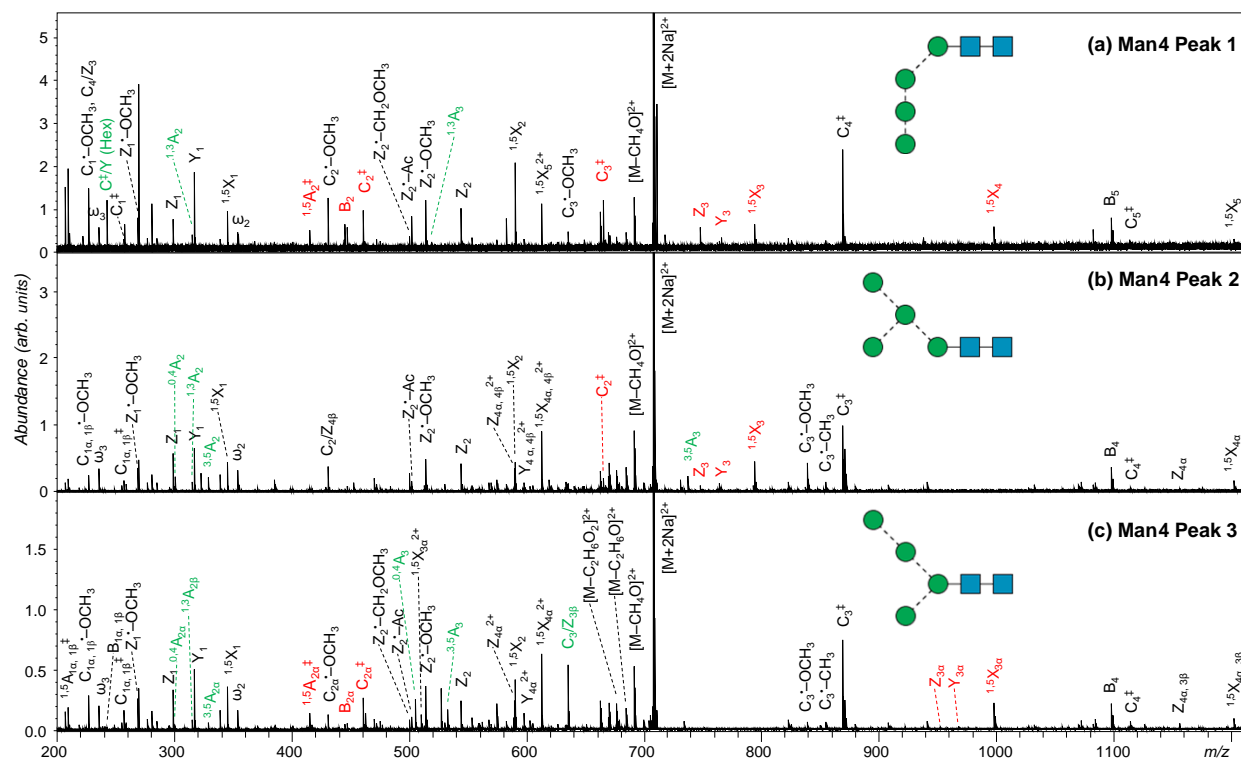

**Figure S1.** EED spectra of the three Man4 isomers, acquired at retention times marked in Figure 1a. Glycosidic and 1,5-cross ring fragments unique to each topology are labeled in red; linkage-diagnostic cross-ring and secondary fragments are labeled in green. Complete lists of assigned fragments can be found in Supporting Tables S10-12.

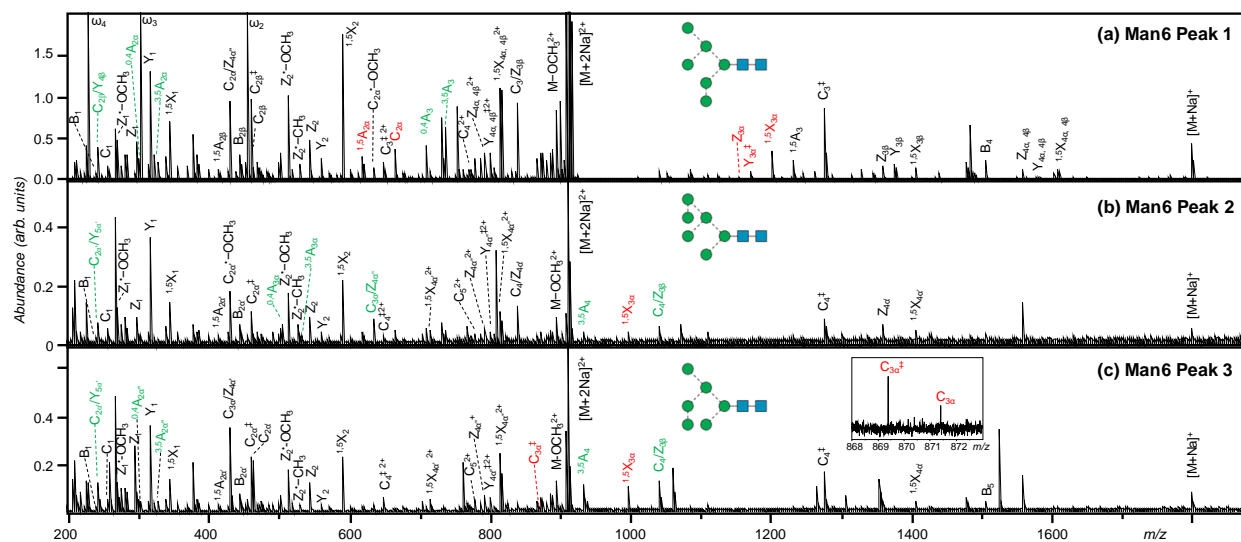

**Figure S2.** EED spectra of the three Man6 isomers, acquired at retention times marked in Figure 1c. Glycosidic and 1,5-cross ring fragments unique to each topology are labeled in red; linkage-diagnostic cross-ring and secondary fragments are labeled in green. Inset shows the zoomed-in region where  $C_{3\alpha}$  and  $C_{3\alpha}^+$  ions were observed (but not identified by SNAP). Complete lists of assigned fragments can be found in Supporting Tables S13-15.

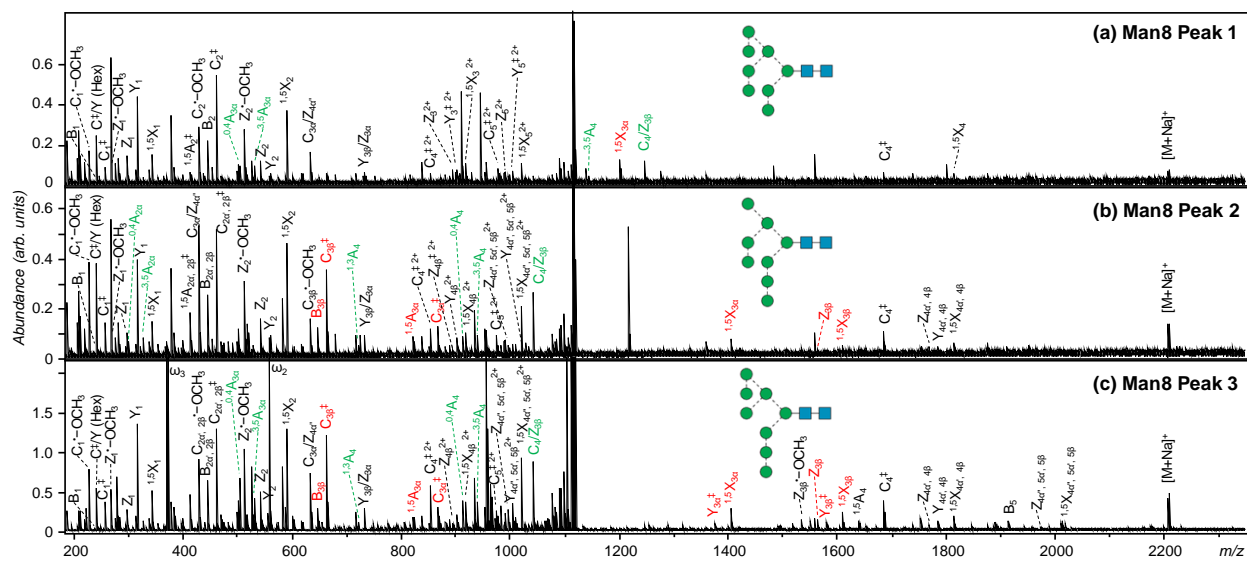

**Figure S3.** EED spectra of the three Man8 isomers, acquired at retention times marked in Figure 1e. Glycosidic and 1,5-cross ring fragments unique to each topology are labeled in red; linkage-diagnostic cross-ring and secondary fragments are labeled in green. Complete lists of assigned fragments can be found in Supporting Tables S16-18.



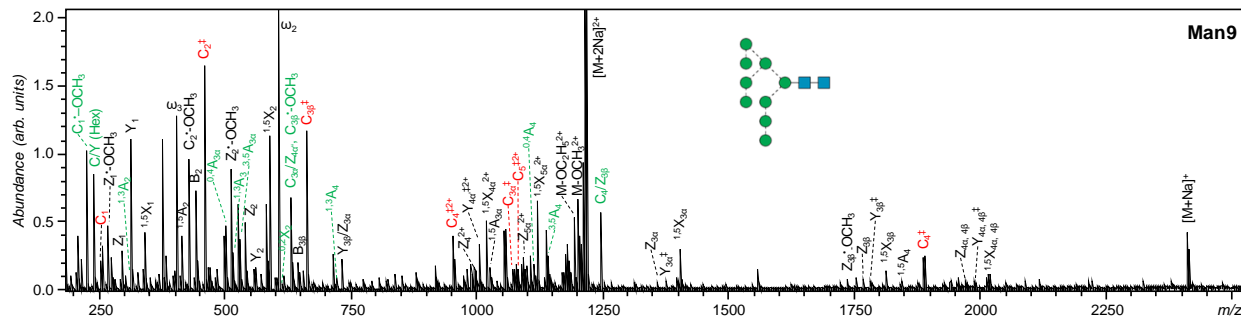

**Figure S4.** The EED spectrum of the Man9 structure acquired at the retention time marked in Figure 1f. Glycosidic and 1,5-cross ring fragments unique to each topology are labeled in red; linkage-diagnostic cross-ring and secondary fragments are labeled in green. A complete list of assigned fragments can be found in Supporting Tables S19.

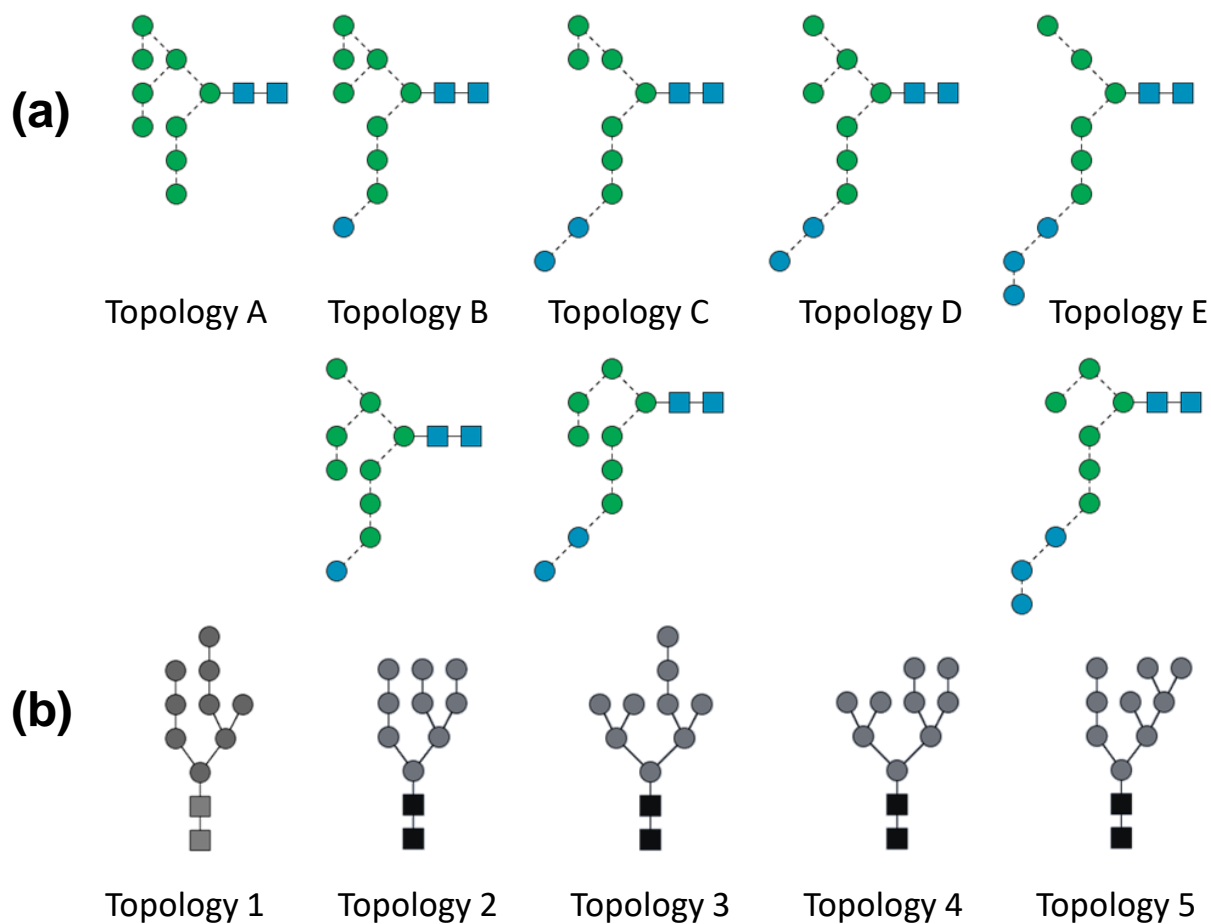

**Figure S5.** (a) Five different Man9 topologies (A-E) may be derived from the tetradecameric *N*-glycan precursor; (b) Five top-ranked topology candidates as determined by GlycoDeNovo based on the EED tandem mass spectrum of Man9 from RNase B. Note that these candidate topologies are the same as those identified by GlycoDeNovo from the EED tandem mass spectrum of the Man9 glycan standard.<sup>1</sup>

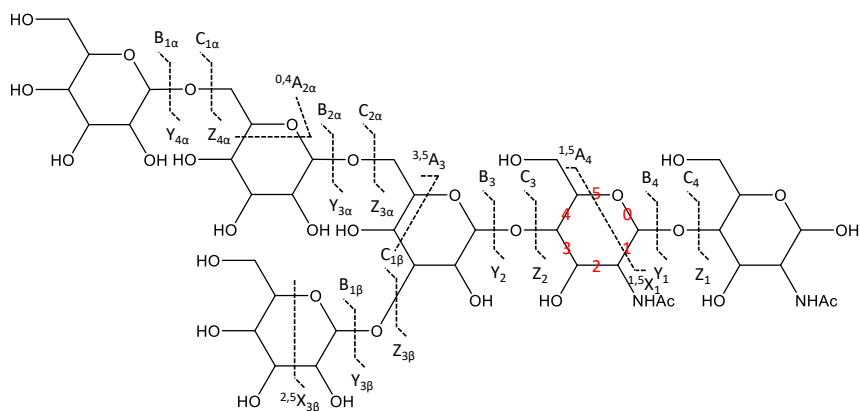

**Scheme S1.** Illustration of the Domon-Costello nomenclature for glycan fragmentation. Glycosidic fragments are labeled as B-, C- (non-reducing-end), and Y-, Z- (reducing-end) ions, whereas cross-ring fragments are labeled as A- (non-reducing-end) and X- (reducing-end) ions. Superscripts indicate the bonds cleaved in cross-ring fragments (bond indices are shown in the internal GlcNAc residue), whereas the Greek letters  $\alpha$ ,  $\beta$ , (and  $\gamma$  if necessary) are used to index the primary branches (in decreasing order of their mass values). For secondary branching, ' (prime) and '' (double prime) are used as branch indices.

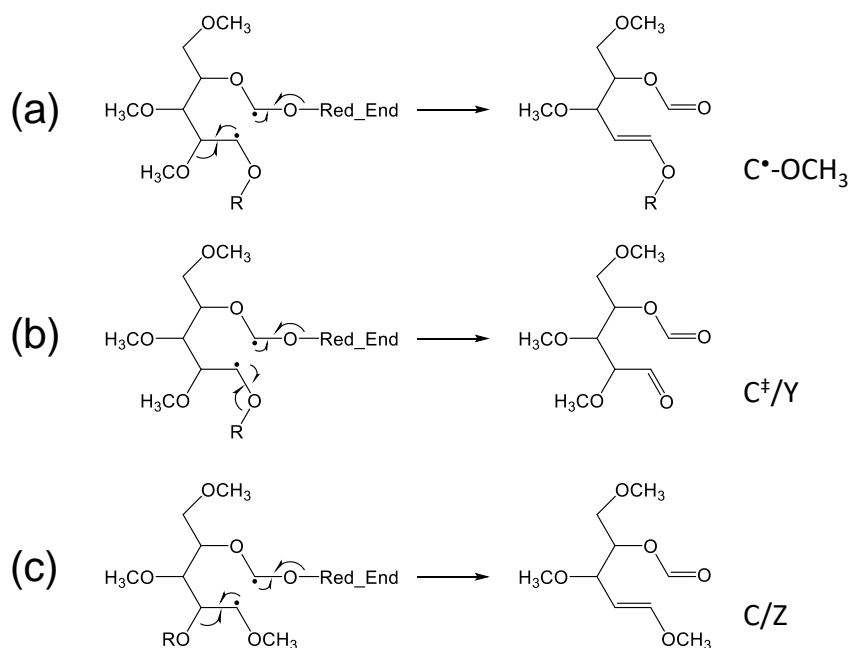

**Scheme S2.** Proposed EED mechanisms for the formation of (a)  $C^*-OCH_3$ , (b)  $C^*/Y$ , and (c)  $C/Z$  ions from the C1-C2 di-radical.

**Table S1.** LC-MS data used to generate the bar diagram and pie charts shown in Figure 5. The peak area of each isomer in its respective EIC was used to calculate its percentage abundance. (a-c) Percentage abundance of each isomer calculated from each of the three LC-MS run; (d) averaged percentage abundance and standard deviation of each isomer calculated from three technical triplicates.

(a)

| Run #1   | Man4 | Man5  | Man6  | Man7 | Man8  | Man9 |
|----------|------|-------|-------|------|-------|------|
| isomer 1 | 0.53 | 0.65  | 21.51 | 0.23 | 0.31  | 5.44 |
| isomer 2 | 5.9  | 1.47  | 0.64  | 1.44 | 0.35  |      |
| isomer 3 | 2.07 | 41.41 | 0.8   | 3.55 | 11.39 |      |
| isomer 4 |      |       |       | 1.37 |       |      |
| isomer 5 |      |       |       | 0.94 |       |      |
| Sum      | 8.5  | 43.53 | 22.94 | 7.53 | 12.06 | 5.44 |

(b)

| Run #2   | Man4 | Man5  | Man6  | Man7 | Man8  | Man9 |
|----------|------|-------|-------|------|-------|------|
| isomer 1 | 0.58 | 0.73  | 18.86 | 0.24 | 0.33  | 5.45 |
| isomer 2 | 6.76 | 1.73  | 0.58  | 1.58 | 0.43  |      |
| isomer 3 | 2.46 | 42.39 | 0.83  | 3.87 | 11.01 |      |
| isomer 4 |      |       |       | 1.44 |       |      |
| isomer 5 |      |       |       | 0.72 |       |      |
| Sum      | 9.8  | 44.86 | 20.27 | 7.86 | 11.76 | 5.45 |

(c)

| Run #3   | Man4 | Man5  | Man6  | Man7 | Man8  | Man9 |
|----------|------|-------|-------|------|-------|------|
| isomer 1 | 0.52 | 0.71  | 18.94 | 0.25 | 0.27  | 5.7  |
| isomer 2 | 6.75 | 1.7   | 0.64  | 1.47 | 0.39  |      |
| isomer 3 | 2.41 | 42.09 | 0.94  | 3.84 | 11.36 |      |
| isomer 4 |      |       |       | 1.44 |       |      |
| isomer 5 |      |       |       | 0.65 |       |      |
| Sum      | 9.68 | 44.5  | 20.52 | 7.65 | 12.01 | 5.7  |

(d)

| average  | Man4        | Man5         | Man6         | Man7        | Man8         | Man9        |
|----------|-------------|--------------|--------------|-------------|--------------|-------------|
| isomer 1 | 0.54 ± 0.03 | 0.70 ± 0.03  | 19.77 ± 1.23 | 0.24 ± 0.01 | 0.30 ± 0.02  | 5.53 ± 0.12 |
| isomer 2 | 6.47 ± 0.40 | 1.63 ± 0.12  | 0.62 ± 0.03  | 1.50 ± 0.06 | 0.39 ± 0.03  |             |
| isomer 3 | 2.31 ± 0.17 | 41.96 ± 0.41 | 0.86 ± 0.06  | 3.75 ± 0.14 | 11.25 ± 0.17 |             |
| isomer 4 |             |              |              | 1.42 ± 0.03 |              |             |
| isomer 5 |             |              |              | 0.77 ± 0.12 |              |             |
| Sum      | 9.33 ± 0.59 | 44.30 ± 0.56 | 21.24 ± 1.20 | 7.68 ± 0.14 | 11.94 ± 0.13 | 5.53 ± 0.12 |

**Table S2.** List of assigned EED fragments in Figure 3a. All fragments are sodium adducts unless labeled otherwise. Multiple assignments are separated by commas;  $\omega$  indicates harmonics; the double dagger symbol ( $\ddagger$ ) indicates that the fragment has two fewer hydrogens than the canonical structures; the double prime symbol ( $''$ ) indicates that the fragment has two more hydrogens than the canonical structure; the dot symbol ( $\cdot$ ) indicates a radical.

| <b>z</b> | <b>Exptl. <i>m/z</i></b> | <b>Theo. <i>m/z</i></b> | <b>Assignment</b>                                           | <b><math>\Delta</math>ppm</b> | <b>Intensity</b> | <b>S/N</b> |
|----------|--------------------------|-------------------------|-------------------------------------------------------------|-------------------------------|------------------|------------|
| 1+       | 211.0940                 | 211.0941                | $B_1\cdot\text{-CH}_3\text{O}$                              | -0.40                         | 2873742          | 72.7       |
| 1+       | 227.0889                 | 227.0890                | $C_1\cdot\text{-CH}_3\text{O}, C_{2\alpha}/Z_{4\alpha}$     | -0.28                         | 7065568          | 173.7      |
| 1+       | 237.1322                 | 237.1319                | $Z_1\ddagger\cdot\text{-C}_2\text{H}_5\text{O}_2$           | 1.29                          | 221641           | 5.4        |
| 1+       | 241.1046                 | 241.1046                | $B_1$                                                       | -0.39                         | 1204942          | 30.8       |
| 1+       | 243.0838                 | 243.0839                | $C_1\cdot\text{-CH}_3, C_{2\beta}\ddagger/Y_{4\beta}$       | -0.29                         | 4814282          | 118.1      |
| 1+       | 255.1425                 | 255.1424                | $Z_1\cdot\text{-C}_2\text{H}_5\text{O}$                     | 0.32                          | 1296933          | 31.3       |
| 1+       | 257.0995                 | 257.0996                | $C_1\ddagger$                                               | -0.19                         | 2378836          | 57.2       |
| 1+       | 259.1152                 | 259.1152                | $C_1$                                                       | 0.04                          | 787400           | 18.9       |
| 1+       | 269.1582                 | 269.1582                | $Z_1\cdot\text{-CH}_3\text{O}$                              | -0.01                         | 5959412          | 142.1      |
| 1+       | 285.1531                 | 285.1531                | $Z_1\cdot\text{-CH}_3$                                      | -0.08                         | 3110948          | 72.7       |
| 1+       | 299.1688                 | 299.1687                | $Z_1$                                                       | 0.02                          | 6174722          | 143.7      |
| 1+       | 315.1414                 | 315.1414                | $^{1,3}A_2, ^{2,4}A_2$                                      | -0.08                         | 2348182          | 54.5       |
| 1+       | 315.1637                 | 315.1637                | $Y_1\ddagger$                                               | 0.07                          | 2692867          | 62.5       |
| 1+       | 317.1793                 | 317.1793                | $Y_1$                                                       | 0.04                          | 12713578         | 294.9      |
| 1+       | 345.1743                 | 345.1742                | $^{1,5}X_1$                                                 | 0.08                          | 6450310          | 148.9      |
| 1+       | 355.1727                 | 355.1726                | $^{1,5}A_{2\alpha, 2\beta}\text{-C}_2\text{H}_5\text{O}_2$  | 0.13                          | 525412           | 12.1       |
| 1+       | 357.1527                 | 357.1520                | $^{1,4}A_{2\alpha, 2\beta}\ddagger$                         | 1.93                          | 352527           | 8.1        |
| 1+       | 371.1676                 | 371.1677                | $^{1,5}A_{2\alpha, 2\beta}\text{-C}_2\text{H}_5\text{O}$    | -0.33                         | 1186438          | 27.0       |
| 1+       | 379.1341                 | 379.1346                | $^{1,4}A_{2\alpha, 2\beta}\ddagger + 2\text{Na} - \text{H}$ | -1.29                         | 7124488          | 134.2      |
| 1+       | 385.1833                 | 385.1833                | $B_{2\alpha, 2\beta}\cdot\text{-C}_2\text{H}_5\text{O}_2$   | -0.15                         | 1151389          | 25.9       |
| 1+       | 401.1774                 | 401.1781                | $C_{2\alpha, 2\beta}\cdot\text{-C}_2\text{H}_5\text{O}_2$   | -1.88                         | 809886           | 17.8       |
| 1+       | 415.1938                 | 415.1939                | $^{1,5}A_{2\alpha, 2\beta}\ddagger$                         | -0.06                         | 3541254          | 76.5       |
| 1+       | 417.1733                 | 417.1732                | $C_{2\alpha, 2\beta}\cdot\text{-C}_2\text{H}_5\text{O}$     | 0.35                          | 1044355          | 22.6       |
| 1+       | 417.2095                 | 417.2095                | $^{1,5}A_{2\alpha, 2\beta}$                                 | -0.10                         | 2102364          | 45.4       |
| 1+       | 431.1886                 | 431.1888                | $C_{2\alpha, 2\beta}\cdot\text{-CH}_3\text{O}$              | -0.30                         | 4566826          | 98.2       |
| 1+       | 445.2043                 | 445.2044                | $B_{2\alpha, 2\beta}$                                       | -0.20                         | 3731052          | 79.7       |
| 1+       | 447.1837                 | 447.1837                | $C_{2\alpha, 2\beta}\cdot\text{-CH}_3$                      | -0.05                         | 1275545          | 27.2       |
| 1+       | 458.2600                 | 458.2583                | $^{0,3}X_1$                                                 | 3.74                          | 285324           | 6.1        |
| 1+       | 461.1993                 | 461.1993                | $C_{2\alpha, 2\beta}\ddagger$                               | -0.05                         | 13378716         | 284.7      |
| 1+       | 463.2150                 | 463.2150                | $C_{2\alpha, 2\beta}$                                       | 0.08                          | 3847508          | 81.9       |
| 1+       | 484.2740                 | 484.2740                | $Z_2\cdot\text{-C}_2\text{H}_5\text{O}_2$                   | 0.03                          | 961898           | 20.1       |
| 1+       | 500.2690                 | 500.2688                | $Z_2\cdot\text{-C}_2\text{H}_5\text{O}$                     | 0.38                          | 2063426          | 42.2       |

|    |           |           |                                                               |       |          |        |
|----|-----------|-----------|---------------------------------------------------------------|-------|----------|--------|
| 1+ | 502.2846  | 502.2845  | Z <sub>2</sub> <sup>*</sup> -Ac                               | 0.18  | 3062035  | 62.7   |
| 1+ | 505.2256  | 505.2256  | <sup>0,4</sup> A <sub>3</sub>                                 | 0.00  | 3988789  | 81.6   |
| 1+ | 514.2846  | 514.2845  | Z <sub>2</sub> <sup>*</sup> -CH <sub>3</sub> O                | 0.20  | 8661585  | 175.5  |
| 1+ | 519.2412  | 519.2412  | <sup>1,3</sup> A <sub>3</sub> , <sup>2,4</sup> A <sub>3</sub> | 0.00  | 1553424  | 31.5   |
| 1+ | 527.2077  | 527.2081  | <sup>0,4</sup> A <sub>3</sub> + 2Na - H                       | -0.62 | 699.4572 | 116.0  |
| 1+ | 530.2796  | 530.2794  | Z <sub>2</sub> <sup>*</sup> -CH <sub>3</sub>                  | 0.22  | 1628087  | 32.7   |
| 1+ | 533.2568  | 533.2568  | <sup>3,5</sup> A <sub>3</sub>                                 | -0.03 | 3814683  | 76.6   |
| 1+ | 544.2952  | 544.2951  | Z <sub>2</sub>                                                | 0.26  | 5061577  | 100.8  |
| 1+ | 547.2374  | 547.2361  | <sup>0,3</sup> A <sub>3</sub> <sup>‡</sup>                    | 2.33  | 203949   | 4.1    |
| 2+ | 549.2517  | 549.2518  | C <sub>3</sub>                                                | -0.04 | 404388   | 8.1    |
| 1+ | 560.2893  | 560.2900  | Y <sub>2</sub> <sup>‡</sup>                                   | -1.14 | 692690   | 13.7   |
| 1+ | 561.2523  | 561.2518  | <sup>1,4</sup> A <sub>3</sub> <sup>‡</sup>                    | 0.98  | 559768   | 11.1   |
| 1+ | 562.3057  | 562.3056  | Y <sub>2</sub>                                                | 0.03  | 2795911  | 55.3   |
| 1+ | 590.3005  | 590.3005  | <sup>1,5</sup> X <sub>2</sub>                                 | -0.08 | 10477073 | 202.4  |
| 2+ | 598.7975  | 598.7971  | Y <sub>3α, 3β</sub>                                           | 0.64  | 355556   | 6.9    |
| 2+ | 612.7947  | 612.7945  | <sup>1,5</sup> X <sub>3α, 3β</sub>                            | 0.17  | 2468150  | 46.9   |
| 1+ | 618.3315  | 618.3318  | <sup>0,2</sup> X <sub>2</sub>                                 | -0.58 | 444551   | 14.1   |
| 2+ | 626.8102  | 626.8102  | <sup>0,2</sup> X <sub>3α, 3β</sub>                            | 0.04  | 150668   | 2.8    |
| 1+ | 633.2736  | 633.2729  | C <sub>3</sub> <sup>‡</sup> /Z <sub>3β</sub>                  | 1.07  | 812789   | 15.3   |
| 1+ | 635.2886  | 635.2885  | C <sub>3</sub> /Z <sub>3β</sub>                               | 0.11  | 9676599  | 181.6  |
| 1+ | 651.2844  | 651.2835  | C <sub>3</sub> <sup>‡</sup> /Y <sub>3β</sub>                  | 1.51  | 1392638  | 25.8   |
| 2+ | 662.8098  | 662.8096  | B <sub>4</sub>                                                | 0.28  | 289323   | 5.4    |
| 2+ | 671.8155  | 671.8149  | C <sub>4</sub>                                                | 0.87  | 683674   | 12.4   |
| 1+ | 679.2790  | 679.2784  | C <sub>3</sub> <sup>‡</sup> / <sup>1,5</sup> X <sub>3β</sub>  | 0.91  | 1910368  | 34.7   |
| 1+ | 681.2938  | 681.2940  | C <sub>3</sub> / <sup>1,5</sup> X <sub>3β</sub>               | -0.35 | 724925   | 13.2   |
| 2+ | 691.8419  | 691.8417  | Z <sub>4</sub>                                                | 0.24  | 2875935  | 51.2   |
| 2+ | 714.8446  | 714.8444  | <sup>1,5</sup> X <sub>4α, 4β</sub>                            | 0.22  | 5736413  | 100.2  |
| 2+ | 728.8604  | 728.8601  | <sup>0,2</sup> X <sub>4α, 4β</sub>                            | 0.44  | 476334   | 8.3    |
| 1+ | 734.3793  | 734.3792  | Y <sub>3α</sub> /Z <sub>3β</sub>                              | 0.19  | 2618777  | 45.7   |
| 2+ | 736.8463  | 736.8464  | <sup>0,2</sup> A <sub>5</sub>                                 | -0.15 | 535328   | 9.3    |
| 1+ | 750.3740  | 750.3741  | Y <sub>3α</sub> /Y <sub>3β</sub> <sup>‡</sup>                 | -0.15 | 161816   | 2.8    |
| 2+ | 772.8868  | 772.8863  | <sup>0,4</sup> X <sub>4α, 4β</sub>                            | 0.67  | 2572913  | 43.6   |
| 2+ | 809.9048  | 809.9047  | M                                                             | 0.17  | 2.21E+08 | 3710.9 |
| 1+ | 837.3737  | 837.3727  | C <sub>3</sub> <sup>‡</sup> /Z <sub>4β, 4α</sub>              | 1.20  | 566628   | 9.4    |
| 1+ | 839.3881  | 839.3883  | C <sub>3</sub> /Z <sub>4β, 4α</sub>                           | -0.30 | 899309   | 15.0   |
| 1+ | 880.4147  | 880.4149  | C <sub>4</sub> /Z <sub>3β, 3α</sub>                           | -0.19 | 1137246  | 18.7   |
| 1+ | 1027.4946 | 1027.4932 | <sup>1,5</sup> A <sub>3</sub> <sup>‡</sup>                    | 1.38  | 832485   | 12.6   |

|    |           |           |                                       |       |          |       |
|----|-----------|-----------|---------------------------------------|-------|----------|-------|
| 1+ | 1029.4727 | 1029.4725 | $C_3^{\bullet}-C_2H_5O$               | 0.14  | 240826   | 3.6   |
| 1+ | 1029.5102 | 1029.5088 | $^{1,5}A_3$                           | 1.35  | 943822   | 14.3  |
| 1+ | 1041.4741 | 1041.4725 | $C_3^{\bullet+}-CH_3O$                | 1.62  | 466149   | 7.1   |
| 1+ | 1043.4885 | 1043.4881 | $C_3^{\bullet}-CH_3O$                 | 0.43  | 1387132  | 21.0  |
| 1+ | 1059.4831 | 1059.4830 | $C_3^{\bullet}-CH_3$                  | 0.07  | 759880   | 11.1  |
| 1+ | 1073.5005 | 1073.4987 | $C_3^{\ddagger}$                      | 1.70  | 12147318 | 177.3 |
| 1+ | 1126.5838 | 1126.5838 | $Z_{3\beta,3\alpha}^{\bullet}-CH_3O$  | -0.04 | 1689504  | 23.8  |
| 1+ | 1142.5784 | 1142.5788 | $Z_{3\beta,3\alpha}^{\bullet}-CH_3$   | -0.29 | 991560   | 14.0  |
| 1+ | 1145.5563 | 1145.5562 | $^{3,5}A_4$                           | 0.15  | 762870   | 10.7  |
| 1+ | 1156.5877 | 1156.5944 | $Z_{3\beta,3\alpha}$                  | -5.76 | 2260766  | 69.0  |
| 1+ | 1172.5908 | 1172.5893 | $Y_{3\beta,3\alpha}^{\ddagger}$       | 1.31  | 1174105  | 16.5  |
| 1+ | 1174.6054 | 1174.6050 | $Y_{3\beta,3\alpha}$                  | 0.38  | 299088   | 4.2   |
| 1+ | 1202.6005 | 1202.5999 | $^{1,5}X_{3\alpha, 3\beta}$           | 0.49  | 5245769  | 70.9  |
| 1+ | 1274.6366 | 1274.6351 | $^{1,5}A_4$                           | 1.11  | 210208   | 2.7   |
| 1+ | 1286.5997 | 1286.5988 | $C_4^{\bullet+}-CH_3O$                | 0.75  | 1140849  | 14.8  |
| 1+ | 1302.6305 | 1302.6301 | $B_4$                                 | 0.33  | 3069241  | 39.9  |
| 1+ | 1318.6253 | 1318.6250 | $C_4^{\ddagger}$                      | 0.23  | 1052044  | 13.7  |
| 1+ | 1330.6826 | 1330.6836 | $Z_{4\alpha, 4\beta}^{\bullet}-CH_3O$ | -0.77 | 447767   | 5.8   |
| 1+ | 1346.6797 | 1346.6785 | $Z_{4\alpha, 4\beta}^{\bullet}-CH_3$  | 0.84  | 511886   | 6.7   |
| 1+ | 1360.6975 | 1360.6942 | $Z_{4\alpha, 4\beta}$                 | 2.47  | 559153   | 7.0   |
| 1+ | 1376.6908 | 1376.6891 | $Y_{4\alpha, 4\beta}^{\ddagger}$      | 1.25  | 210316   | 2.6   |
| 1+ | 1406.6994 | 1406.6996 | $^{1,5}X_{4\alpha, 4\beta}$           | -0.20 | 1045958  | 13.1  |
| 1+ | 1534.7845 | 1534.7833 | $M-C_2H_6O_2$                         | 0.78  | 233494   | 2.8   |
| 1+ | 1564.7948 | 1564.7939 | $M-CH_4O$                             | 0.57  | 396924   | 4.8   |
| 1+ | 1596.8212 | 1596.8201 | $M$                                   | 0.63  | 4163465  | 48.0  |

**Table S3.** List of assigned EED fragments in Figure 3b. All fragments are sodium adducts unless labeled otherwise. Multiple assignments are separated by commas;  $\omega$  indicates harmonics; the double dagger symbol ( $\ddagger$ ) indicates that the fragment has two fewer hydrogens than the canonical structures; the double prime symbol ( $''$ ) indicates that the fragment has two more hydrogens than the canonical structure; the dot symbol ( $\cdot$ ) indicates a radical.

| <b>z</b> | <b>Exptl. m/z</b> | <b>Theo. m/z</b> | <b>Assignment</b>                                                        | <b><math>\Delta</math>ppm</b> | <b>Intensity</b> | <b>S/N</b> |
|----------|-------------------|------------------|--------------------------------------------------------------------------|-------------------------------|------------------|------------|
| 1+       | 211.0940          | 211.0941         | $B_1\cdot$ -CH <sub>3</sub> O                                            | -0.54                         | 1964612          | 49.9       |
| 1+       | 213.0733          | 213.0734         | $C_1\cdot$ -CH <sub>3</sub> O,<br>$C_{2\alpha}/Z_{4\alpha}$              | -0.75                         | 355917           | 9.1        |
| 1+       | 227.0889          | 227.0890         | $C_1\cdot$ -C <sub>2</sub> H <sub>5</sub> O                              | -0.33                         | 4041060          | 99.2       |
| 1+       | 241.1046          | 241.1046         | $B_1$                                                                    | -0.39                         | 735006           | 17.9       |
| 1+       | 243.0832          | 243.0839         | $C_1\cdot$ -CH <sub>3</sub> ,<br>$C_{2\beta}\ddagger/Y_{4\beta}$         | -3.08                         | 3682156          | 191.9      |
| 1+       | 255.1430          | 255.1424         | $Z_1\cdot$ -C <sub>2</sub> H <sub>5</sub> O                              | 2.16                          | 858820           | 20.8       |
| 1+       | 257.0995          | 257.0996         | $C_1\ddagger$                                                            | -0.15                         | 1710004          | 41.4       |
| 1+       | 259.1148          | 259.1152         | $C_1$                                                                    | -1.58                         | 1079389          | 52.6       |
| 1+       | 269.1582          | 269.1582         | $Z_1\cdot$ -CH <sub>3</sub> O                                            | -0.09                         | 4979386          | 119.1      |
| 1+       | 285.1531          | 285.1531         | $Z_1\cdot$ -CH <sub>3</sub>                                              | -0.26                         | 2797937          | 66.3       |
| 1+       | 296.1104          | 296.1105         | $B_4/^{1,5}X_2$                                                          | -0.06                         | 761092           | 18.0       |
| 1+       | 299.1688          | 299.1687         | $Z_1$                                                                    | 0.29                          | 4992278          | 118.3      |
| 1+       | 301.1258          | 301.1258         | $^{0,4}A_{2\alpha}$                                                      | -0.08                         | 1306170          | 30.9       |
| 1+       | 315.1414          | 315.1414         | $^{1,3}A_{2\beta}, ^{2,4}A_{2\beta}$                                     | -0.14                         | 1157585          | 26.7       |
| 1+       | 315.1637          | 315.1637         | $Y_1\ddagger$                                                            | 0.00                          | 1679168          | 38.7       |
| 1+       | 317.1793          | 317.1793         | $Y_1$                                                                    | -0.06                         | 11701574         | 269.9      |
| 1+       | 323.1077          | 323.1084         | $^{0,4}A_{2\alpha} + 2Na - H$                                            | -0.29                         | 510571           | 11.0       |
| 1+       | 329.1571          | 329.1571         | $^{3,5}A_{2\alpha}$                                                      | 0.08                          | 2609897          | 59.1       |
| 1+       | 345.1523          | 345.1520         | $^{0,3}A_{2\beta}$                                                       | 0.93                          | 186375           | 4.2        |
| 1+       | 345.1742          | 345.1742         | $^{1,5}X_1$                                                              | -0.01                         | 5883602          | 132.8      |
| 1+       | 357.1519          | 357.1520         | $^{1,4}A_{2\beta}\ddagger$                                               | -0.31                         | 485664           | 11.0       |
| 1+       | 371.1676          | 371.1676         | $^{2,5}A_{2\alpha}\ddagger$                                              | -0.11                         | 929183           | 21.2       |
| 1+       | 379.1340          | 379.1346         | $^{1,4}A_{2\beta}\ddagger + 2Na - H$                                     | -0.29                         | 4426286          | 93.8       |
| 1+       | 401.1779          | 401.1781         | $C_{2\alpha, 2\beta}\cdot$ -C <sub>2</sub> H <sub>5</sub> O <sub>2</sub> | -0.48                         | 822935           | 18.3       |
| 1+       | 415.1938          | 415.1939         | $^{1,5}A_{2\alpha, 2\beta}\ddagger$                                      | -0.13                         | 2526446          | 55.4       |
| 1+       | 417.1732          | 417.1732         | $C_{2\alpha, 2\beta}\cdot$ -C <sub>2</sub> H <sub>5</sub> O              | 0.02                          | 899378           | 19.7       |
| 1+       | 417.2095          | 417.2095         | $^{1,5}A_{2\alpha, 2\beta}$                                              | -0.06                         | 1250871          | 27.4       |
| 1+       | 431.1887          | 431.1888         | $C_{2\alpha, 2\beta}\cdot$ -CH <sub>3</sub> O                            | -0.25                         | 5162347          | 112.2      |



|    |          |          |                                     |       |          |       |
|----|----------|----------|-------------------------------------|-------|----------|-------|
| 1+ | 445.2044 | 445.2044 | $B_{2\alpha, 2\beta}$               | -0.15 | 3342667  | 71.7  |
| 1+ | 447.1838 | 447.1837 | $C_{2\alpha, 2\beta}^* - CH_3$      | 0.17  | 876116   | 18.8  |
| 1+ | 458.2579 | 458.2583 | ${}^0,3X_1$                         | -0.80 | 311587   | 6.6   |
| 1+ | 461.1993 | 461.1993 | $C_{2\alpha, 2\beta}^\ddagger$      | -0.14 | 12016012 | 255.8 |
| 1+ | 463.2150 | 463.2150 | $C_{2\alpha, 2\beta}$               | 0.01  | 3256405  | 69.1  |
| 1+ | 500.2688 | 500.2688 | $Z_2^* - C_2H_5O$                   | 0.04  | 1484287  | 30.3  |
| 1+ | 502.2845 | 502.2845 | $Z_2^* - Ac$                        | -0.02 | 2679921  | 54.8  |
| 1+ | 503.2107 | 503.2099 | ${}^0,4A_3^\ddagger$                | 1.53  | 102578   | 2.1   |
| 1+ | 505.2259 | 505.2256 | ${}^0,4A_3$                         | 0.59  | 5238566  | 107.1 |
| 1+ | 514.2846 | 514.2845 | $Z_2^* - CH_3O$                     | 0.20  | 6694641  | 135.5 |
| 1+ | 519.2387 | 519.2412 | ${}^1,3A_3, {}^2,4A_3$              | -4.73 | 789087   | 16.0  |
| 1+ | 527.2077 | 527.2076 | ${}^0,4A_3 + 2Na - H$               | 0.28  | 5278229  | 100.0 |
| 1+ | 530.2794 | 530.2794 | $Z_2^* - CH_3$                      | -0.07 | 1403994  | 28.2  |
| 1+ | 533.2568 | 533.2568 | ${}^3,5A_3$                         | -0.07 | 2719874  | 54.7  |
| 1+ | 544.2955 | 544.2951 | $Z_2$                               | 0.83  | 3996890  | 80.0  |
| 2+ | 549.2518 | 549.2518 | $C_3$                               | 0.05  | 366282   | 7.3   |
| 1+ | 560.2901 | 560.2900 | $Y_2^\ddagger$                      | 0.14  | 433864   | 8.6   |
| 1+ | 562.3057 | 562.3056 | $Y_2$                               | 0.07  | 2080188  | 41.4  |
| 1+ | 590.3006 | 590.3005 | ${}^1,5X_2$                         | 0.09  | 8360624  | 163.3 |
| 2+ | 612.7946 | 612.7945 | ${}^1,5X_{3\alpha, 3\beta}$         | 0.14  | 1643673  | 31.7  |
| 1+ | 633.2733 | 633.2729 | $C_3^\ddagger / Z_{3\beta}$         | 0.68  | 629639   | 12.0  |
| 1+ | 635.2885 | 635.2885 | $C_3 / Z_{3\beta}$                  | -0.05 | 8222604  | 156.2 |
| 1+ | 651.2833 | 651.2835 | $C_3^\ddagger / Y_{3\beta}$         | -0.21 | 1176072  | 22.0  |
| 2+ | 662.8097 | 662.8096 | $B_4$                               | 0.13  | 292446   | 5.5   |
| 2+ | 671.8153 | 671.8149 | $C_4$                               | 0.62  | 513635   | 9.4   |
| 1+ | 679.2791 | 679.2784 | $C_3^\ddagger / {}^1,5X_{3\beta}$   | 1.04  | 1272322  | 23.3  |
| 2+ | 691.8419 | 691.8417 | $Z_4$                               | 0.27  | 1809543  | 32.5  |
| 2+ | 700.8484 | 700.8470 | $Y_4$                               | 2.05  | 273046   | 4.9   |
| 2+ | 714.8446 | 714.8444 | ${}^1,5X_{4\alpha, 4\beta}$         | 0.26  | 5811758  | 102.5 |
| 2+ | 728.8597 | 728.8601 | ${}^0,2X_{4\alpha, 4\beta}$         | -0.54 | 502063   | 8.9   |
| 1+ | 734.3782 | 734.3792 | $Y_{3\alpha} / Z_{3\beta}$          | -1.32 | 2303110  | 40.6  |
| 2+ | 736.8468 | 736.8464 | ${}^0,2A_5$                         | 0.46  | 745837   | 13.2  |
| 2+ | 743.8661 | 743.8654 | ${}^1,4X_{4\alpha, 4\beta}$         | 0.94  | 133246   | 2.3   |
| 1+ | 750.3746 | 750.3741 | $Y_{3\alpha} / Y_{3\beta}^\ddagger$ | 0.63  | 157456   | 2.7   |

|    |           |           |                                                |       |          |        |
|----|-----------|-----------|------------------------------------------------|-------|----------|--------|
| 2+ | 772.8868  | 772.8863  | $^{0,4}X_{4\alpha, 4\beta}$                    | 0.67  | 2013864  | 34.1   |
| 2+ | 809.9047  | 809.9047  | M                                              | 0.07  | 1.67E+08 | 2783.1 |
| 1+ | 837.3736  | 837.3727  | $C_3^\ddagger/Z_{4\beta, 4\alpha}$             | 1.16  | 385998   | 6.4    |
| 1+ | 839.3887  | 839.3883  | $C_3/Z_{4\beta, 4\alpha}$                      | 0.41  | 714603   | 11.8   |
| 1+ | 855.3844  | 855.3832  | $C_3^\ddagger/Y_{4\beta, 4\alpha}$             | 1.39  | 551698   | 9.1    |
| 1+ | 880.4151  | 880.4149  | $C_4/Z_{3\beta, 3\alpha}$                      | 0.21  | 711735   | 11.5   |
| 1+ | 1027.4944 | 1027.4932 | $^{1,5}A_3^\ddagger$                           | 1.18  | 738329   | 11.1   |
| 1+ | 1029.5094 | 1029.5088 | $^{1,5}A_3$                                    | 0.55  | 806133   | 12.1   |
| 1+ | 1041.4727 | 1041.4725 | $C_3^{\bullet*}-CH_3O$                         | 0.19  | 479437   | 7.2    |
| 1+ | 1043.4884 | 1043.4881 | $C_3^{\bullet*}-CH_3O$                         | 0.27  | 1554097  | 23.4   |
| 1+ | 1059.4829 | 1059.4830 | $C_3^{\bullet*}-CH_3$                          | -0.07 | 859731   | 12.4   |
| 1+ | 1073.5002 | 1073.4987 | $C_3^\ddagger$                                 | 1.44  | 9500072  | 137.5  |
| 1+ | 1126.5841 | 1126.5838 | $Z_{3\beta, 3\alpha}^{\bullet*}-CH_3O$         | 0.25  | 770422   | 10.8   |
| 1+ | 1142.5804 | 1142.5787 | $Z_{3\beta, 3\alpha}^{\bullet*}-CH_3$          | 1.47  | 539508   | 7.5    |
| 1+ | 1145.5559 | 1145.5562 | $^{3,5}A_4$                                    | -0.22 | 732848   | 10.3   |
| 1+ | 1156.5939 | 1156.5944 | $Z_{3\beta, 3\alpha}$                          | -0.46 | 930737   | 13.0   |
| 1+ | 1172.5907 | 1172.5893 | $Y_{3\beta, 3\alpha}^\ddagger$                 | 1.21  | 828507   | 11.6   |
| 1+ | 1174.6058 | 1174.6050 | $Y_{3\beta, 3\alpha}$                          | 0.69  | 349303   | 4.9    |
| 1+ | 1202.6001 | 1202.5999 | $^{1,5}X_{3\alpha, 3\beta}$                    | 0.17  | 3204361  | 43.2   |
| 1+ | 1274.6358 | 1274.6351 | $^{1,5}A_4$                                    | 0.50  | 327922   | 4.3    |
| 1+ | 1286.5999 | 1286.5988 | $C_4^{\bullet*}-CH_3O$                         | 0.88  | 1201965  | 15.6   |
| 1+ | 1302.6297 | 1302.6301 | $B_4$                                          | -0.32 | 2688109  | 35.0   |
| 1+ | 1318.6252 | 1318.6250 | $C_4^\ddagger$                                 | 0.14  | 1088242  | 14.2   |
| 1+ | 1406.7013 | 1406.6996 | $^{1,5}X_{4\alpha, 4\beta}$                    | 1.17  | 770838   | 9.7    |
| 1+ | 1534.7764 | 1534.7833 | M-C <sub>2</sub> H <sub>6</sub> O <sub>2</sub> | -4.48 | 205359   | 2.5    |
| 1+ | 1552.7900 | 1552.7939 | M-C <sub>2</sub> H <sub>6</sub> O              | -2.56 | 177809   | 2.2    |
| 1+ | 1564.7944 | 1564.7939 | M-CH <sub>4</sub> O                            | 0.28  | 519313   | 6.3    |
| 1+ | 1596.8209 | 1596.8201 | M                                              | 0.46  | 3462592  | 40.4   |

**Table S4.** List of assigned EED fragments in Figure 3c. All fragments are sodium adducts unless labeled otherwise. Multiple assignments are separated by commas;  $\omega$  indicates harmonics; the double dagger symbol ( $\ddagger$ ) indicates that the fragment has two fewer hydrogens than the canonical structures; the double prime symbol ( $''$ ) indicates that the fragment has two more hydrogens than the canonical structure; the dot symbol ( $\cdot$ ) indicates a radical.

| $z$ | Exptl. $m/z$ | Theo. $m/z$ | Assignment                                               | $\Delta$ ppm | Intensity | $S/N$ |
|-----|--------------|-------------|----------------------------------------------------------|--------------|-----------|-------|
| 1+  | 211.0940     | 211.0941    | $B_1^{\cdot}-CH_3O$                                      | -0.69        | 1647187   | 80.2  |
| 1+  | 213.0732     | 213.0734    | $C_1^{\cdot}-C_2H_5O_2$                                  | -0.84        | 401616    | 15.8  |
| 1+  | 227.0889     | 227.0890    | $C_1^{\cdot}-CH_3O$                                      | -0.48        | 6602338   | 336.4 |
| 1+  | 236.0893     | 236.0894    | $C_4^{\ddagger}/Z_2^{\cdot}-CH_3$                        | -0.55        | 471343    | 19.4  |
| 1+  | 237.1320     | 237.1319    | $Z_1^{\ddagger\cdot}-C_2H_5O_2$                          | 0.03         | 479253    | 19.8  |
| 1+  | 238.1049     | 238.1050    | $C_4/Z_2^{\cdot}-CH_3$                                   | -0.52        | 849975    | 39.0  |
| 1+  | 239.1475     | 239.1476    | $Z_1^{\cdot}-C_2H_5O_2$                                  | -0.43        | 1058638   | 49.8  |
| 1+  | 241.1045     | 241.1046    | $B_1$                                                    | -0.43        | 1456488   | 70.4  |
| 1+  | 253.1268     | 253.1269    | $Z_1^{\ddagger\cdot}-C_2H_5O$                            | -0.45        | 388208    | 15.1  |
| 1+  | 254.0998     | 254.0999    | $C_1^{\cdot}-CH_3$                                       | -0.58        | 449043    | 18.3  |
| 1+  | 255.1425     | 255.1425    | $Z_1^{\cdot}-C_2H_5O$                                    | -0.13        | 1100916   | 52.0  |
| 1+  | 257.0995     | 257.0996    | $C_1^{\ddagger}$                                         | -0.27        | 4525083   | 229.0 |
| 1+  | 259.1152     | 259.1152    | $C_1$                                                    | -0.11        | 3214072   | 161.2 |
| 1+  | 268.1154     | 268.1155    | $C_4/Z_2$                                                | -0.39        | 1007005   | 47.1  |
| 1+  | 269.1581     | 269.1582    | $Z_1^{\cdot}-CH_3O$                                      | -0.39        | 9260723   | 473.8 |
| 1+  | 285.1531     | 285.1531    | $Z_1^{\cdot}-CH_3$                                       | -0.33        | 4473650   | 224.7 |
| 1+  | 296.1104     | 296.1105    | $B_4/^{1,5}X_2$                                          | -0.26        | 1150634   | 53.6  |
| 1+  | 299.1687     | 299.1687    | $Z_1$                                                    | -0.18        | 10032741  | 505.4 |
| 1+  | 301.1257     | 301.1258    | $^{0,4}A_{2\alpha}$                                      | -0.21        | 4885688   | 242.9 |
| 1+  | 315.1413     | 315.1414    | $^{1,3}A_{2\alpha, 2\beta}, ^{2,4}A_{2\alpha, 2\beta}$   | -0.30        | 1843856   | 87.7  |
| 1+  | 315.1636     | 315.1637    | $Y_1^{\ddagger}$                                         | -0.36        | 3331345   | 162.4 |
| 1+  | 317.1792     | 317.1793    | $Y_1$                                                    | -0.19        | 17699662  | 883.7 |
| 1+  | 323.1077     | 323.1078    | $^{0,4}A_{2\alpha} + 2Na - H$                            | -0.29        | 5236821   | 114.1 |
| 1+  | 329.1570     | 329.1571    | $^{3,5}A_{2\alpha}$                                      | -0.38        | 4747952   | 231.8 |
| 1+  | 341.1569     | 341.1571    | $^{2,5}A_{2\alpha}/Z_{4\alpha, 3\beta}$                  | -0.33        | 1121335   | 50.6  |
| 1+  | 345.1741     | 345.1742    | $^{1,5}X_2$                                              | -0.27        | 9980800   | 486.8 |
| 1+  | 353.1569     | 353.1571    | $^{1,5}A_{2\alpha}^{\ddagger}/Z_{4\alpha}^{\cdot}-CH_3O$ | -0.66        | 466721    | 18.0  |
| 1+  | 355.1726     | 355.1728    | $^{1,5}A_{2\alpha}/Z_{4\alpha}^{\cdot}-CH_3O$            | -0.48        | 2212701   | 103.2 |
| 1+  | 369.1518     | 369.1520    | $C_{2\alpha}/Z_{4\alpha}^{\cdot}-C_2H_5O_2$              | -0.37        | 758484    | 31.8  |

|    |          |          |                                                                |       |          |       |
|----|----------|----------|----------------------------------------------------------------|-------|----------|-------|
| 1+ | 371.1675 | 371.1677 | $^{1,5}A_{2\alpha}/Y_{4\alpha}^{\bullet}-CH_3O$                | -0.36 | 1732078  | 79.0  |
| 1+ | 383.1676 | 383.1677 | $C_{2\alpha}^{\ddagger}/Z_{4\alpha}^{\bullet}-C_2H_5O$         | -0.35 | 1213431  | 53.3  |
| 1+ | 385.1467 | 385.1470 | $C_{2\alpha}/Z_{4\alpha}^{\bullet}-C_2H_5O$                    | -0.70 | 894140   | 38.0  |
| 1+ | 385.1832 | 385.1833 | $^{1,5}A_{2\alpha}/Z_{4\alpha}$                                | -0.36 | 4350751  | 203.8 |
| 1+ | 399.1624 | 399.1626 | $C_{2\alpha}^{\ddagger}/Z_{4\alpha}^{\bullet}-CH_3O$           | -0.35 | 1340301  | 58.7  |
| 1+ | 401.1780 | 401.1783 | $C_{2\alpha}/Z_{4\alpha}^{\bullet}-CH_3O$                      | -0.57 | 1650441  | 73.4  |
| 1+ | 403.1938 | 403.1939 | $^{1,5}A_{2\alpha}/Y_{4\alpha}$                                | -0.16 | 428377   | 15.4  |
| 1+ | 413.1780 | 413.1782 | $B_{2\alpha}/Z_{4\alpha}$                                      | -0.40 | 1048466  | 44.3  |
| 1+ | 414.2319 | 414.2321 | $^{0,3}X_1^{\bullet}-C_2H_5O$                                  | -0.55 | 921187   | 38.3  |
| 1+ | 415.1573 | 415.1574 | $C_{2\alpha}^{\ddagger}/^{1,5}X_{4\alpha}^{\bullet}-C_2H_5O_2$ | -0.36 | 512446   | 19.1  |
| 1+ | 417.1730 | 417.1731 | $C_{2\alpha}^{\ddagger}/Y_{4\alpha}^{\bullet}-CH_3O$           | -0.25 | 949086   | 39.6  |
| 1+ | 428.2475 | 428.2478 | $^{0,3}X_1^{\bullet}-CH_3O$                                    | -0.58 | 903541   | 37.2  |
| 1+ | 429.1730 | 429.1731 | $C_{2\alpha}^{\ddagger}/Z_{4\alpha}''$                         | -0.18 | 1623043  | 70.8  |
| 1+ | 431.1886 | 431.1888 | $C_{2\alpha}/Z_{4\alpha}''$                                    | -0.51 | 10088251 | 465.9 |
| 1+ | 447.1835 | 447.1837 | $C_{2\alpha}^{\ddagger}/Y_{4\alpha}$                           | -0.53 | 2595410  | 114.7 |
| 1+ | 449.1992 | 449.1993 | $C_{2\alpha}/Y_{4\alpha}$                                      | -0.30 | 1087601  | 45.2  |
| 1+ | 453.1712 | 453.1708 | $C_{2\alpha}/Z_{4\alpha}'' + 2Na - H$                          | 0.86  | 1737426  | 37.0  |
| 1+ | 458.2581 | 458.2583 | $^{0,3}X_1$                                                    | -0.34 | 571892   | 21.2  |
| 1+ | 459.1835 | 459.1837 | $B_{2\alpha}/^{1,5}X_{4\alpha}$                                | -0.33 | 467938   | 16.5  |
| 1+ | 470.2582 | 470.2583 | $Z_2^{\bullet}-C_3H_7O_2$                                      | -0.29 | 3208600  | 140.8 |
| 1+ | 472.2738 | 472.2739 | $Z_2''^{\bullet}-C_3H_7O_2$                                    | -0.29 | 2505702  | 108.9 |
| 1+ | 473.1993 | 473.1993 | $^{0,4}A_{3\alpha}/Z_{4\alpha}$                                | 0.01  | 627878   | 23.4  |
| 1+ | 475.1784 | 475.1787 | $C_{2\alpha}/^{2,5}X_{4\alpha}^{\bullet}-C_2H_5O$              | -0.55 | 3606382  | 157.5 |
| 1+ | 477.1941 | 477.1942 | $C_{2\alpha}/^{1,5}X_{4\alpha}$                                | -0.35 | 2223511  | 95.2  |
| 1+ | 482.2584 | 482.2583 | $Z_2^{\ddagger\bullet}-C_2H_5O_2$                              | 0.30  | 516640   | 18.3  |
| 1+ | 484.2737 | 484.2740 | $Z_2^{\bullet}-C_2H_5O_2$                                      | -0.55 | 1300204  | 53.6  |
| 1+ | 487.2145 | 487.2150 | $^{2,4}A_{3\alpha}/Z_{4\alpha}$                                | -0.91 | 448793   | 15.1  |
| 1+ | 491.2098 | 491.2099 | $^{0,4}A_{3\alpha}/Y_{4\alpha}$                                | -0.30 | 1531173  | 63.4  |
| 1+ | 500.2687 | 500.2689 | $Z_2^{\bullet}-C_2H_5O$                                        | -0.33 | 2392493  | 101.0 |
| 1+ | 502.2843 | 502.2845 | $Z_2^{\bullet}-Ac$                                             | -0.29 | 4120549  | 177.4 |
| 1+ | 503.2094 | 503.2099 | $B_{2\alpha}/^{2,5}X_{4\alpha}$                                | -0.93 | 549011   | 19.4  |
| 1+ | 512.2689 | 512.2689 | $Z_2^{\ddagger\bullet}-CH_3O$                                  | 0.03  | 591915   | 21.0  |
| 1+ | 514.2843 | 514.2846 | $Z_2^{\bullet}-CH_3O$                                          | -0.46 | 11465812 | 497.7 |
| 1+ | 519.2046 | 519.2049 | $C_{2\alpha}/^{2,5}X_{4\alpha}^{\bullet}-C_2H_5O$              | -0.46 | 1638468  | 66.9  |

|    |          |          |                                                |       |          |       |
|----|----------|----------|------------------------------------------------|-------|----------|-------|
| 1+ | 529.2255 | 529.2256 | $B_{2\alpha}^{\bullet}-CH_3/^{2,4}X_{4\alpha}$ | -0.14 | 654269   | 23.5  |
| 1+ | 530.2793 | 530.2795 | $Z_2^{\bullet}-CH_3$                           | -0.35 | 2629396  | 109.2 |
| 1+ | 544.2949 | 544.2951 | $Z_2$                                          | -0.32 | 8216068  | 348.0 |
| 1+ | 545.2567 | 545.2569 | $^{2,5}A_{3\alpha}/Z_{4\alpha}$                | -0.33 | 587700   | 20.4  |
| 1+ | 547.2358 | 547.2361 | $B_{2\alpha}/^{3,5}X_{4\alpha}$                | -0.63 | 1666232  | 66.7  |
| 1+ | 559.2724 | 559.2725 | $^{1,5}A_{2\alpha}^{\bullet}-C_2H_5O$          | -0.17 | 426964   | 13.3  |
| 1+ | 560.2899 | 560.2900 | $Y_2^{\ddagger}$                               | -0.26 | 1142142  | 43.7  |
| 1+ | 561.2513 | 561.2518 | $^{0,2}A_{3\alpha}/Z_{4\alpha}$                | -0.79 | 714206   | 25.5  |
| 1+ | 562.3054 | 562.3056 | $Y_2$                                          | -0.38 | 2588801  | 105.1 |
| 1+ | 567.7785 | 567.7790 | $Z_{3\beta}^{\bullet}-CH_3O$                   | -0.90 | 768813   | 27.8  |
| 1+ | 573.2515 | 573.2518 | $B_{2\alpha}^{\ddagger}/^{0,4}X_{4\alpha}$     | -0.56 | 1676121  | 65.6  |
| 1+ | 575.2669 | 575.2674 | $B_{2\alpha}/^{0,4}X_{4\alpha}$                | -0.82 | 927723   | 34.1  |
| 1+ | 590.3003 | 590.3005 | $^{1,5}X_2$                                    | -0.48 | 13528799 | 556.7 |
| 1+ | 603.2620 | 603.2624 | $C_{2\alpha}^{\ddagger}-C_2H_5O_2$             | -0.73 | 1882890  | 72.4  |
| 1+ | 605.2772 | 605.2780 | $C_{2\alpha}^{\bullet}-C_2H_5O_2$              | -1.18 | 1118721  | 41.1  |
| 1+ | 614.2785 | 614.2783 | $C_4/Z_{3\beta}^{\bullet}-C_2H_5O_2$           | 0.32  | 458781   | 14.0  |
| 1+ | 618.3315 | 618.3318 | $^{0,2}X_2$                                    | -0.58 | 798860   | 27.9  |
| 1+ | 619.2933 | 619.2937 | $^{1,5}A_{2\alpha}^{\ddagger}$                 | -0.70 | 3455088  | 136.8 |
| 1+ | 621.2727 | 621.2730 | $C_{2\alpha}^{\bullet}-C_2H_5O$                | -0.38 | 1022139  | 37.1  |
| 1+ | 621.3090 | 621.3093 | $^{1,5}A_{2\alpha}$                            | -0.45 | 3232413  | 127.7 |
| 1+ | 633.2727 | 633.2729 | $C_{2\alpha}^{\ddagger}-CH_3O$                 | -0.34 | 841844   | 29.3  |
| 1+ | 635.2882 | 635.2886 | $C_{2\alpha}^{\bullet}-CH_3O$                  | -0.56 | 1163032  | 42.3  |
| 1+ | 649.3040 | 649.3042 | $B_{2\alpha}$                                  | -0.25 | 936522   | 31.1  |
| 1+ | 651.2835 | 651.2835 | $C_{2\alpha}^{\bullet}-CH_3$                   | 0.04  | 738452   | 23.5  |
| 2+ | 654.8231 | 654.8236 | $Z_{4\alpha}^{\bullet}-C_3H_6O_2$              | -0.76 | 561843   | 16.8  |
| 1+ | 665.2988 | 665.2991 | $C_{2\alpha}^{\ddagger}$                       | -0.51 | 5427695  | 189.3 |
| 2+ | 655.8014 | 655.8021 | $C_4^{\bullet}-CH_3O$                          | -1.10 | 2124705  | 76.2  |
| 2+ | 660.8231 | 660.8236 | $Z_{4\alpha}^{\ddagger}-C_2H_5O_2$             | -0.77 | 781366   | 25.1  |
| 2+ | 661.8312 | 661.8314 | $Z_{4\alpha}^{\bullet}-C_2H_5O_2$              | -0.29 | 978408   | 32.6  |
| 1+ | 667.3146 | 667.3148 | $C_{2\alpha}$                                  | -0.28 | 3317750  | 114.0 |
| 2+ | 668.8204 | 668.8211 | $Z_{4\alpha}^{\ddagger}-C_2H_5O$               | -1.02 | 974140   | 30.5  |
| 2+ | 669.8283 | 669.8289 | $Z_{4\alpha}^{\bullet}-C_2H_5O$                | -0.84 | 2825825  | 96.5  |
| 2+ | 671.8147 | 671.8152 | $C_4$                                          | -0.76 | 2016361  | 67.6  |
| 2+ | 676.8363 | 676.8367 | $Z_{4\alpha}^{\bullet}-CH_3O$                  | -0.70 | 6609414  | 231.4 |

|    |          |          |                                                                            |       |            |         |
|----|----------|----------|----------------------------------------------------------------------------|-------|------------|---------|
| 2+ | 683.8255 | 683.8263 | $Z_{4\alpha, 3\beta}^{\ddagger} \cdot \text{CH}_3$                         | -1.16 | 816341     | 24.8    |
| 2+ | 684.8339 | 684.8342 | $Z_{4\alpha, 3\beta}^{\bullet} \cdot \text{CH}_3$                          | -0.38 | 2892606    | 98.8    |
| 2+ | 691.8416 | 691.8420 | $Z_{4\alpha, 3\beta}$                                                      | -0.58 | 6765116    | 222.3   |
| 2+ | 699.8393 | 699.8395 | $^{1,5}\text{X}_{4\alpha} \cdot \text{CH}_3\text{O}$                       | -0.30 | 4379086    | 142.4   |
| 1+ | 704.3097 | 704.3100 | $\text{B}_4 / ^{1,5}\text{X}_{4\alpha}$                                    | -0.38 | 3571359    | 115.4   |
| 1+ | 709.3248 | 709.3253 | $^{0,4}\text{A}_3$                                                         | -0.69 | 7041628    | 231.5   |
| 2+ | 714.8441 | 714.8447 | $^{1,5}\text{X}_{4\alpha, 3\beta}$                                         | -0.91 | 18353794   | 572.0   |
| 2+ | 728.8601 | 728.8604 | $^{0,2}\text{X}_{4\alpha, 3\beta}$                                         | -0.41 | 1091315    | 30.3    |
| 1+ | 731.3070 | 731.3073 | $^{0,4}\text{A}_3 + 2\text{Na} - \text{H}$                                 | -0.48 | 11962754   | 371.4   |
| 1+ | 734.3789 | 734.3792 | $\text{Y}_{3\alpha} / \text{Z}_{3\beta}$                                   | -0.34 | 2466867    | 73.5    |
| 2+ | 735.8675 | 735.8682 | $^{0,3}\text{X}_{4\alpha} \cdot \text{CH}_3$                               | -1.00 | 1793287    | 52.3    |
| 1+ | 737.3565 | 737.3566 | $^{3,5}\text{A}_3$                                                         | -0.19 | 4477020    | 136.5   |
| 2+ | 742.8566 | 742.8578 | $^{3,4}\text{X}_{4\alpha} \cdot \text{CH}_3\text{O}$                       | -1.61 | 829596     | 20.7    |
| 2+ | 743.8650 | 743.8657 | $^{1,5}\text{X}_{4\alpha, 3\beta}$                                         | -0.82 | 437563     | 9.2     |
| 2+ | 749.8648 | 749.8657 | $^{0,3}\text{X}_{4\alpha, 3\beta} \cdot 2\text{H}$                         | -1.20 | 677969     | 16.2    |
| 2+ | 756.8732 | 756.8735 | $^{0,4}\text{X}_{4\alpha, 3\beta} \cdot \text{CH}_3\text{O}$               | -0.43 | 458285     | 9.7     |
| 2+ | 765.8773 | 765.8788 | $^{1,3}\text{X}_{4\alpha, 3\beta}$                                         | -1.85 | 1866801    | 51.1    |
| 2+ | 771.8780 | 771.8788 | $\text{M} \cdot \text{C}_3\text{H}_6\text{O}_2$                            | -1.02 | 3722016    | 98.9    |
| 2+ | 772.8865 | 772.8866 | $^{0,4}\text{X}_{4\alpha, 3\beta}$                                         | -0.12 | 4496429    | 120.2   |
| 2+ | 778.8861 | 778.8866 | $\text{M} \cdot \text{C}_2\text{H}_6\text{O}_2$                            | -0.67 | 4284023    | 114.4   |
| 2+ | 786.8836 | 786.8841 | $\text{M} \cdot \text{C}_2\text{H}_6\text{O}$                              | -0.65 | 5277520    | 141.7   |
| 1+ | 791.3676 | 791.3672 | $^{1,5}\text{A}_3^{\ddagger} / \text{Z}_{3\beta}$                          | 0.48  | 539637     | 11.3    |
| 1+ | 793.3821 | 793.3828 | $^{1,5}\text{A}_3 / \text{Z}_{3\beta}$                                     | -0.93 | 2023665    | 52.1    |
| 2+ | 793.8912 | 793.8919 | $\text{M} \cdot \text{CH}_4\text{O}$                                       | -0.86 | 11798102   | 321.2   |
| 2+ | 801.8889 | 801.8894 | $\text{M} \cdot \text{CH}_4$                                               | -0.62 | 2088985    | 52.2    |
| 2+ | 809.9047 | 809.9047 | $\text{M}$                                                                 | 0.05  | 2849046272 | 75853.4 |
| 1+ | 839.3880 | 839.3883 | $\text{C}_3 / \text{Z}_{3\beta}$                                           | -0.39 | 13325132   | 369.6   |
| 1+ | 855.3830 | 855.3832 | $\text{C}_3^{\ddagger} / \text{Y}_{3\beta}$                                | -0.25 | 1573691    | 40.3    |
| 1+ | 883.3776 | 883.3782 | $\text{C}_3 / ^{2,5}\text{X}_{4\alpha} \cdot \text{C}_2\text{H}_5\text{O}$ | -0.64 | 3253004    | 92.7    |
| 1+ | 908.4679 | 908.4684 | $\text{Z}_{3\alpha} \cdot \text{C}_2\text{H}_5\text{O}$                    | -0.52 | 1146433    | 30.0    |
| 1+ | 910.4840 | 910.4840 | $^{0,4}\text{X}_{2\beta}$                                                  | -0.11 | 695106     | 16.6    |
| 1+ | 922.4832 | 922.4841 | $\text{Z}_{3\alpha} \cdot \text{CH}_3\text{O}$                             | -0.99 | 539720     | 12.8    |
| 1+ | 938.4792 | 938.4790 | $\text{Z}_{3\alpha} \cdot \text{CH}_3$                                     | 0.21  | 545839     | 13.0    |
| 1+ | 952.4945 | 952.4946 | $\text{Z}_{3\alpha}$                                                       | -0.10 | 1115516    | 31.1    |

|    |           |           |                                        |       |          |       |
|----|-----------|-----------|----------------------------------------|-------|----------|-------|
| 1+ | 955.4357  | 955.4357  | $B_3/{}^{3,5}X_{4\alpha, 3\beta}$      | 0.08  | 509621   | 12.8  |
| 1+ | 968.4897  | 968.4896  | $Y_{3\alpha}^\ddagger$                 | 0.09  | 1579545  | 49.6  |
| 1+ | 998.4996  | 998.5001  | ${}^{1,5}X_{3\alpha}$                  | -0.49 | 7903364  | 267.2 |
| 1+ | 1011.4616 | 1011.4619 | $C_3^{\ddagger*}-C_2H_5O_2$            | -0.33 | 629658   | 16.5  |
| 1+ | 1013.4744 | 1013.4774 | $C_3^*-C_2H_5O_2$                      | -2.98 | 458754   | 10.7  |
| 1+ | 1027.4935 | 1027.4932 | ${}^{1,5}A_3^\ddagger$                 | 0.27  | 1492620  | 45.4  |
| 1+ | 1029.5094 | 1029.5088 | ${}^{1,5}A_3$                          | 0.57  | 1127810  | 33.2  |
| 1+ | 1041.4725 | 1041.4725 | $C_3^{\ddagger*}-CH_3O$                | 0.03  | 1147636  | 33.8  |
| 1+ | 1043.4886 | 1043.4881 | $C_3^*-CH_3O$                          | 0.48  | 1294448  | 38.7  |
| 1+ | 1052.4884 | 1052.4884 | $C_4/Z_{3\beta}^*-CH_3O$               | 0.00  | 485687   | 11.6  |
| 1+ | 1057.5033 | 1057.5037 | $B_3$                                  | -0.43 | 449714   | 10.3  |
| 1+ | 1059.4824 | 1059.4830 | $C_3^*-CH_3$                           | -0.61 | 1688684  | 50.6  |
| 1+ | 1066.5032 | 1066.5041 | $B_4/Z_{3\beta}$                       | -0.83 | 516141   | 12.2  |
| 1+ | 1073.4984 | 1073.4987 | $C_3^\ddagger$                         | -0.28 | 15357848 | 497.9 |
| 1+ | 1075.5153 | 1075.5143 | $C_3$                                  | 0.89  | 4832515  | 153.5 |
| 1+ | 1084.5148 | 1084.5146 | $C_4/Z_{3\beta}$                       | 0.13  | 1319147  | 38.5  |
| 1+ | 1112.5092 | 1112.5096 | $B_4/{}^{1,5}X_{3\beta}$               | -0.31 | 2170512  | 66.3  |
| 1+ | 1142.5789 | 1142.5787 | $Y_{4\alpha'}/Z_{4\alpha''}$           | 0.12  | 690849   | 17.3  |
| 1+ | 1145.5560 | 1145.5562 | ${}^{3,5}A_4$                          | -0.16 | 1638224  | 47.4  |
| 1+ | 1274.6365 | 1274.6351 | ${}^{1,5}A_4$                          | 1.08  | 1017111  | 25.0  |
| 1+ | 1276.6136 | 1276.6144 | $C_4^{\ddagger*}-C_2H_5O_2$            | -0.68 | 3924661  | 109.8 |
| 1+ | 1286.5985 | 1286.5988 | $C_4^{\ddagger*}-CH_3O$                | -0.25 | 1285552  | 32.8  |
| 1+ | 1288.6136 | 1288.6144 | $C_4^*-CH_3O$                          | -0.68 | 1300945  | 33.3  |
| 1+ | 1302.6296 | 1302.6301 | $B_4$                                  | -0.35 | 4915037  | 138.6 |
| 1+ | 1318.6247 | 1318.6250 | $C_4^\ddagger$                         | -0.22 | 1658910  | 43.6  |
| 1+ | 1330.6817 | 1330.6837 | $Z_{4\alpha, 3\beta}^*-CH_3O$          | -1.49 | 1059375  | 26.1  |
| 1+ | 1346.6791 | 1346.6786 | $Z_{4\alpha, 3\beta}^*-CH_3$           | 0.39  | 684842   | 15.2  |
| 1+ | 1360.6965 | 1360.6942 | $Z_{4\alpha, 3\beta}$                  | 1.69  | 1216143  | 30.0  |
| 1+ | 1376.6882 | 1376.6668 | ${}^{2,4}A_5$                          | 15.52 | 751526   | 16.7  |
| 1+ | 1378.7056 | 1378.7047 | $Y_{4\alpha, 3\beta}$                  | 0.65  | 1914688  | 49.9  |
| 1+ | 1406.6988 | 1406.6996 | ${}^{1,5}X_{4\alpha, 3\beta}$          | -0.62 | 3157117  | 85.3  |
| 1+ | 1520.7673 | 1520.7678 | ${}^{0,4}X_{4\alpha, 3\beta}^\ddagger$ | -0.29 | 683584   | 14.3  |
| 1+ | 1522.7832 | 1522.7834 | ${}^{0,4}X_{4\alpha, 3\beta}$          | -0.12 | 735320   | 15.7  |
| 1+ | 1534.7828 | 1534.7833 | $M-C_2H_6O_2$                          | -0.33 | 654024   | 13.5  |

|    |           |           |                                   |       |         |       |
|----|-----------|-----------|-----------------------------------|-------|---------|-------|
| 1+ | 1550.7802 | 1550.7783 | M-C <sub>2</sub> H <sub>6</sub> O | 1.16  | 542227  | 10.3  |
| 1+ | 1564.7937 | 1564.7939 | M-CH <sub>4</sub> O               | -0.18 | 1331505 | 31.6  |
| 1+ | 1596.8192 | 1596.8201 | M                                 | -0.57 | 8028314 | 214.4 |



**Table S5.** List of assigned EED fragments in Figure 4a. All fragments are sodium adducts unless labeled otherwise. Multiple assignments are separated by commas;  $\omega$  indicates harmonics; the double dagger symbol ( $\ddagger$ ) indicates that the fragment has two fewer hydrogens than the canonical structures; the double prime symbol ( $''$ ) indicates that the fragment has two more hydrogens than the canonical structure; the dot symbol ( $\cdot$ ) indicates a radical.

| <b>z</b> | <b>Exptl. m/z</b> | <b>Theo. m/z</b> | <b>Assignment</b>                                                                                         | <b><math>\Delta</math>ppm</b> | <b>Intensity</b> | <b>S/N</b> |
|----------|-------------------|------------------|-----------------------------------------------------------------------------------------------------------|-------------------------------|------------------|------------|
| 1+       | 211.0940          | 211.0941         | $B_1\cdot$ -CH <sub>3</sub> O                                                                             | -0.45                         | 1055191          | 32.6       |
| 1+       | 227.0889          | 227.0890         | $C_1\cdot$ -CH <sub>3</sub> O or C <sub>3<math>\alpha</math></sub> /Z <sub>4<math>\alpha</math></sub>     | -0.28                         | 2814648          | 85.2       |
| 1+       | 241.1045          | 241.1046         | B <sub>1</sub>                                                                                            | -0.56                         | 320719           | 14.8       |
| 1+       | 243.0839          | 243.0839         | C <sub>2<math>\beta</math></sub> , 2 $\alpha$ <sup>†</sup> /Y <sub>5<math>\beta</math></sub> , 5 $\alpha$ | -0.24                         | 2871041          | 86.3       |
| 1+       | 259.1151          | 259.1152         | C <sub>1</sub>                                                                                            | -0.27                         | 422941           | 21.5       |
| 1+       | 269.1578          | 269.1582         | Z <sub>1</sub> <sup>•</sup> -CH <sub>3</sub> O                                                            | -1.65                         | 5109139          | 328.9      |
| 1+       | 285.1531          | 285.1531         | Z <sub>1</sub> <sup>•</sup> -CH <sub>3</sub>                                                              | 0.06                          | 861134           | 25.3       |
| 1+       | 299.1688          | 299.1687         | Z <sub>1</sub>                                                                                            | 0.29                          | 976914           | 28.2       |
| 1+       | 315.1637          | 315.1637         | Y <sub>1</sub> <sup>‡</sup>                                                                               | 0.26                          | 494156           | 14.2       |
| 1+       | 317.1794          | 317.1793         | Y <sub>1</sub>                                                                                            | 0.16                          | 4023138          | 115.4      |
| 1+       | 345.1743          | 345.1742         | <sup>1,5</sup> X <sub>1</sub>                                                                             | 0.25                          | 1519902          | 43.8       |
| 1+       | 415.1938          | 415.1939         | <sup>1,5</sup> A <sub>2<math>\alpha</math></sub> , 2 $\beta$ <sup>‡</sup>                                 | -0.23                         | 1251157          | 34.3       |
| 1+       | 417.1715          | 417.1732         | C <sub>2</sub> <sup>•</sup> -C <sub>2</sub> H <sub>5</sub> O                                              | -4.13                         | 349829           | 9.6        |
| 1+       | 417.2097          | 417.2095         | <sup>1,5</sup> A <sub>2<math>\alpha</math></sub> , 2 $\beta$                                              | 0.49                          | 492772           | 13.5       |
| 1+       | 431.1888          | 431.1888         | C <sub>2</sub> <sup>•</sup> -CH <sub>3</sub> O                                                            | 0.07                          | 2977497          | 81.2       |
| 1+       | 445.2045          | 445.2044         | B <sub>2</sub>                                                                                            | 0.14                          | 1447751          | 38.9       |
| 1+       | 447.1838          | 447.1837         | C <sub>2</sub> <sup>•</sup> -CH <sub>3</sub>                                                              | 0.22                          | 760957           | 20.4       |
| 1+       | 461.1994          | 461.1993         | C <sub>2</sub> <sup>‡</sup>                                                                               | 0.12                          | 3672059          | 97.2       |
| 1+       | 463.2151          | 463.2150         | C <sub>2</sub>                                                                                            | 0.19                          | 719571           | 35.6       |
| 1+       | 484.2748          | 484.2740         | Z <sub>2</sub> <sup>•</sup> -C <sub>2</sub> H <sub>5</sub> O <sub>2</sub>                                 | 1.74                          | 165490           | 4.3        |
| 1+       | 502.2847          | 502.2845         | Z <sub>2</sub> <sup>•</sup> -Ac                                                                           | 0.24                          | 1240317          | 31.9       |
| 1+       | 514.2847          | 514.2845         | Z <sub>2</sub> <sup>•</sup> -CH <sub>3</sub> O                                                            | 0.40                          | 2183949          | 55.8       |
| 1+       | 519.2412          | 519.2412         | <sup>1,3</sup> A <sub>3</sub> , <sup>2,4</sup> A <sub>3</sub>                                             | 0.06                          | 629363           | 16.1       |
| 1+       | 544.2957          | 544.2951         | Z <sub>2</sub>                                                                                            | 1.16                          | 1234656          | 30.7       |
| 1+       | 562.3058          | 562.3056         | Y <sub>2</sub>                                                                                            | 0.37                          | 509542           | 12.5       |
| 1+       | 590.3006          | 590.3005         | <sup>1,5</sup> X <sub>2</sub>                                                                             | 0.14                          | 2838203          | 67.9       |
| 1+       | 619.2939          | 619.2936         | <sup>1,5</sup> A <sub>3</sub> <sup>‡</sup>                                                                | 0.41                          | 555355           | 13.1       |
| 1+       | 621.3075          | 621.3093         | <sup>1,5</sup> A <sub>3</sub>                                                                             | -2.91                         | 494165           | 20.3       |
| 1+       | 635.2888          | 635.2885         | C <sub>3</sub> <sup>•</sup> -CH <sub>3</sub> O                                                            | 0.36                          | 514830           | 12.0       |
| 1+       | 649.3045          | 649.3042         | B <sub>3</sub>                                                                                            | 0.43                          | 586959           | 13.5       |

|    |           |           |                                                  |       |          |       |
|----|-----------|-----------|--------------------------------------------------|-------|----------|-------|
| 1+ | 665.2999  | 665.2991  | $C_3^\ddagger$                                   | 1.12  | 3117244  | 71.0  |
| 1+ | 667.3146  | 667.3148  | $C_3$                                            | -0.28 | 635339   | 14.5  |
| 1+ | 709.3232  | 709.3253  | $^{0,4}A_4$                                      | -3.02 | 1085660  | 49.3  |
| 2+ | 714.8451  | 714.8444  | $^{1,5}X_{3\alpha, 3\beta}$                      | 0.87  | 338438   | 7.6   |
| 1+ | 723.3390  | 723.3410  | $^{1,3}A_{4\beta}, ^{2,4}A_{4\beta}$             | -2.74 | 410707   | 14.6  |
| 1+ | 731.3049  | 731.3073  | $^{0,4}A_4 + 2Na - H$                            | -3.31 | 1521600  | 70.5  |
| 1+ | 734.3796  | 734.3792  | $Y_{3\alpha}/Z_{3\beta}$                         | 0.61  | 504915   | 11.3  |
| 1+ | 737.3567  | 737.3566  | $^{3,5}A_4$                                      | 0.04  | 725807   | 16.2  |
| 2+ | 816.8950  | 816.8943  | $^{1,5}X_{4\alpha, 4\beta}$                      | 0.82  | 555717   | 11.6  |
| 1+ | 839.3884  | 839.3883  | $C_4/Z_{3\beta}$                                 | 0.10  | 2573351  | 52.4  |
| 2+ | 895.9371  | 895.9415  | $Z_{5\alpha, 5\beta}$                            | -4.92 | 216858   | 4.3   |
| 2+ | 932.9603  | 932.9599  | $^{0,2}X_{5\alpha, 5\beta}$                      | 0.45  | 130040   | 2.5   |
| 2+ | 976.9854  | 976.9861  | $^{0,4}X_{5\alpha, 5\beta}$                      | -0.73 | 619465   | 11.6  |
| 2+ | 1014.0046 | 1014.0045 | M                                                | 0.11  | 42215732 | 771.4 |
| 1+ | 1330.6822 | 1330.6836 | $Z_{3\alpha, 3\beta} \cdot \text{-CH}_3\text{O}$ | -1.05 | 200581   | 3.2   |
| 1+ | 1360.6891 | 1360.6942 | $Z_{3\alpha, 3\beta}$                            | -3.70 | 594482   | 9.1   |
| 1+ | 1376.6913 | 1376.6891 | $Y_{3\alpha, 3\beta}^\ddagger$                   | 1.64  | 223257   | 3.4   |
| 1+ | 1406.6992 | 1406.6996 | $^{1,5}X_{3\alpha, 3\beta}$                      | -0.31 | 1052571  | 16.2  |
| 1+ | 1481.6988 | 1481.6982 | $C_4^\ddagger$                                   | 0.42  | 1033515  | 15.3  |
| 1+ | 1564.7954 | 1564.7939 | $Z_{4\alpha, 4\beta}$                            | 0.95  | 244007   | 3.4   |
| 1+ | 1580.7911 | 1580.7888 | $Y_{4\alpha, 4\beta}^\ddagger$                   | 1.39  | 215404   | 3.0   |
| 1+ | 1610.7974 | 1610.7994 | $^{1,5}X_{4\alpha, 4\beta}$                      | -1.23 | 405091   | 5.7   |
| 1+ | 1710.8251 | 1710.8296 | $B_5$                                            | -2.64 | 289943   | 3.8   |
| 1+ | 2005.0179 | 2005.0197 | M                                                | -0.92 | 902317   | 11.3  |

**Table S6.** List of assigned EED fragments in Figure 4b. All fragments are sodium adducts unless labeled otherwise. Multiple assignments are separated by commas;  $\omega$  indicates harmonics; the double dagger symbol ( $\ddagger$ ) indicates that the fragment has two fewer hydrogens than the canonical structures; the double prime symbol ( $''$ ) indicates that the fragment has two more hydrogens than the canonical structure; the dot symbol ( $\cdot$ ) indicates a radical.

| $z$ | Exptl. $m/z$ | Theo. $m/z$ | Assignment                                                                        | $\Delta$ ppm | Intensity | S/N   |
|-----|--------------|-------------|-----------------------------------------------------------------------------------|--------------|-----------|-------|
| 1+  | 211.0939     | 211.0941    | $B_1\cdot$ -CH <sub>3</sub> O                                                     | -1.06        | 4367299   | 131.6 |
| 1+  | 227.0888     | 227.0890    | $C_1\cdot$ -CH <sub>3</sub> O                                                     | -0.81        | 5803067   | 176.3 |
| 1+  | 239.0892     | 239.0890    | $B_1\ddagger$                                                                     | 0.94         | 123360    | 3.7   |
| 1+  | 241.1045     | 241.1046    | $B_1$                                                                             | -0.60        | 1199589   | 36.2  |
| 1+  | 243.0838     | 243.0839    | $C_1\cdot$ -CH <sub>3</sub> , $C_{2\beta, 2\alpha'}\ddagger/Y_{4\beta, 5\alpha'}$ | -0.66        | 9892578   | 298.1 |
| 1+  | 257.0994     | 257.0996    | $C_1\ddagger$                                                                     | -0.46        | 3073907   | 89.6  |
| 1+  | 259.1151     | 259.1152    | $C_1$                                                                             | -0.42        | 1300205   | 37.9  |
| 1+  | 269.1581     | 269.1582    | $Z_1\cdot$ -CH <sub>3</sub> O                                                     | -0.39        | 4952915   | 144.4 |
| 1+  | 285.1531     | 285.1531    | $Z_1\cdot$ -CH <sub>3</sub>                                                       | -0.19        | 2336968   | 67.8  |
| 1+  | 296.1104     | 296.1105    | $B_5/^{1,5}X_2$                                                                   | -0.26        | 815517    | 23.4  |
| 1+  | 299.1688     | 299.1687    | $Z_1$                                                                             | 0.15         | 3868784   | 111.1 |
| 1+  | 301.1257     | 301.1258    | $^{0,4}A_{2\alpha''}$                                                             | -0.21        | 2499591   | 71.8  |
| 1+  | 315.1414     | 315.1414    | $^{1,3}A_{2\alpha', 2\beta}, ^{2,4}A_{2\alpha', 2\beta}$                          | -0.03        | 1935269   | 55.1  |
| 1+  | 315.1636     | 315.1637    | $Y_1\ddagger$                                                                     | -0.15        | 1535072   | 43.7  |
| 1+  | 317.1793     | 317.1793    | $Y_1$                                                                             | -0.12        | 13718496  | 390.3 |
| 1+  | 323.1073     | 323.1078    | $^{0,4}A_{2\alpha''} + 2Na - H$                                                   | -1.53        | 1990387   | 119   |
| 1+  | 329.1570     | 329.1571    | $^{3,5}A_{2\alpha''}$                                                             | -0.23        | 2074830   | 58.4  |
| 1+  | 343.1364     | 343.1363    | $^{0,3}A_{2\alpha', 2\beta}\ddagger$                                              | 0.18         | 495824    | 13.7  |
| 1+  | 345.1742     | 345.1742    | $^{1,5}X_1$                                                                       | -0.15        | 6200687   | 171.0 |
| 1+  | 387.1990     | 387.1990    | $^{1,5}A_{2\alpha', 2\beta}\ddagger$ -CH <sub>3</sub> O                           | 0.04         | 712325    | 19.1  |
| 1+  | 401.1782     | 401.1781    | $C_{2\alpha', 2\beta}\cdot$ -C <sub>2</sub> H <sub>5</sub> O <sub>2</sub>         | 0.17         | 1505349   | 40.3  |
| 1+  | 413.1782     | 413.1782    | $B_{2\alpha''}/Z_{4\alpha'}$                                                      | -0.08        | 963896    | 25.6  |
| 1+  | 415.1938     | 415.1939    | $^{1,5}A_{2\alpha', 2\beta}\ddagger$                                              | -0.23        | 1819341   | 48.3  |
| 1+  | 417.1730     | 417.1732    | $C_{2\alpha', 2\beta}\cdot$ -C <sub>2</sub> H <sub>5</sub> O                      | -0.37        | 1153996   | 30.6  |
| 1+  | 417.2094     | 417.2095    | $^{1,5}A_{2\alpha', 2\beta}$                                                      | -0.18        | 1638113   | 43.5  |
| 1+  | 429.1730     | 429.1731    | $C_{3\alpha}\ddagger/Z_{4\alpha'}$                                                | -0.25        | 728673    | 19.2  |
| 1+  | 431.1888     | 431.1888    | $C_{3\alpha}/Z_{4\alpha'}$                                                        | 0.00         | 10685049  | 281.2 |
| 1+  | 445.2043     | 445.2044    | $B_{2\alpha', 2\beta}$                                                            | -0.22        | 6132700   | 160.1 |
| 1+  | 447.1836     | 447.1837    | $C_{2\alpha', 2\beta}\cdot$ -CH <sub>3</sub>                                      | -0.19        | 2021576   | 52.8  |

|    |           |           |                                                        |       |          |        |
|----|-----------|-----------|--------------------------------------------------------|-------|----------|--------|
| 1+ | 461.1992  | 461.1993  | $C_{2\alpha',2\beta}^\ddagger$                         | -0.20 | 21401918 | 554.7  |
| 1+ | 463.2149  | 463.2150  | $C_{2\alpha',2\beta}$                                  | -0.14 | 3671208  | 94.9   |
| 1+ | 484.2739  | 484.2740  | $Z_2^*-C_2H_5O_2$                                      | -0.05 | 945413   | 24.3   |
| 1+ | 502.2845  | 502.2845  | $Z_2^*-Ac$                                             | -0.16 | 3993509  | 101.1  |
| 1+ | 514.2846  | 514.2845  | $Z_2^*-CH_3O$                                          | 0.24  | 8685159  | 217.9  |
| 1+ | 519.2411  | 519.2412  | $^{1,3}A_{3\alpha',3\beta}, ^{2,4}A_{3\alpha',3\beta}$ | -0.19 | 2772697  | 69.6   |
| 1+ | 530.2796  | 530.2794  | $Z_2^*-CH_3$                                           | 0.22  | 1752167  | 43.4   |
| 1+ | 544.2955  | 544.2951  | $Z_2$                                                  | 0.74  | 5432477  | 133.0  |
| 1+ | 560.2903  | 560.2900  | $Y_2^\ddagger$                                         | 0.50  | 766153   | 18.7   |
| 1+ | 562.3056  | 562.3056  | $Y_2$                                                  | -0.07 | 2423319  | 59.0   |
| 1+ | 590.3004  | 590.3005  | $^{1,5}X_2$                                            | -0.18 | 12985275 | 312.5  |
| 2+ | 612.7945  | 612.7945  | $^{1,5}X_{3\alpha}$                                    | -0.09 | 452698   | 10.8   |
| 1+ | 618.3311  | 618.3318  | $^{0,2}X_2$                                            | -1.16 | 632260   | 15.1   |
| 1+ | 635.2890  | 635.2885  | $C_4/Z_{4\alpha}$                                      | 0.74  | 1876780  | 44.1   |
| 1+ | 734.3793  | 734.3792  | $Y_{3\alpha}/Z_{3\beta}$                               | 0.15  | 2025212  | 43.2   |
| 2+ | 793.8882  | 793.8916  | $Z_{4\alpha',3\beta}$                                  | -4.29 | 737398   | 15.0   |
| 2+ | 816.8943  | 816.8943  | $^{1,5}X_{3\beta}$                                     | -0.01 | 3256585  | 64.2   |
| 1+ | 825.3725  | 825.3727  | $C_{3\alpha}^*-C_2H_5O$                                | -0.28 | 750060   | 14.8   |
| 1+ | 825.4091  | 825.4091  | $^{1,5}A_{3\alpha}$                                    | 0.00  | 1786031  | 35.2   |
| 1+ | 839.3882  | 839.3883  | $C_{3\alpha}^*-CH_3O$                                  | -0.09 | 690395   | 13.3   |
| 2+ | 852.9088  | 852.9120  | $^{1,5}A_5$                                            | -3.68 | 351960   | 6.8    |
| 1+ | 869.3997  | 869.3989  | $C_{3\alpha}^\ddagger$                                 | 0.89  | 1821835  | 35.0   |
| 1+ | 871.4149  | 871.4145  | $C_{3\alpha}$                                          | 0.40  | 1217776  | 23.4   |
| 2+ | 895.9376  | 895.9415  | $Z_{4\alpha'',5\alpha',4\beta}$                        | -4.31 | 2191200  | 41.1   |
| 1+ | 913.4252  | 913.4251  | $^{0,4}A_4$                                            | 0.06  | 3170175  | 58.4   |
| 2+ | 918.9438  | 918.9442  | $^{1,5}X_{4\alpha'',5\alpha',4\beta}$                  | -0.41 | 7120822  | 131.2  |
| 2+ | 932.9589  | 932.9599  | $^{0,2}X_{4\alpha'',5\alpha',4\beta}$                  | -1.01 | 875924   | 16.1   |
| 1+ | 935.4045  | 935.4071  | $^{0,4}A_4 + 2Na - H$                                  | -2.80 | 8142842  | 152.2  |
| 2+ | 940.9500  | 940.9462  | $^{2,5}X_{4\alpha'',5\alpha',4\beta}$                  | 4.03  | 1965728  | 36.2   |
| 1+ | 941.4566  | 941.4564  | $^{3,5}A_4$                                            | 0.20  | 1508877  | 27.8   |
| 2+ | 976.9853  | 976.9861  | $^{0,4}X_{4\alpha'',5\alpha',4\beta}$                  | -0.77 | 2660931  | 48.0   |
| 2+ | 1014.0039 | 1014.0045 | M                                                      | -0.59 | 1.75E+08 | 3077.5 |
| 1+ | 1043.4875 | 1043.4881 | $C_4/Z_{3\beta}$                                       | -0.56 | 7656820  | 135.0  |
| 1+ | 1126.5835 | 1126.5838 | $Z_{3\alpha}^*-CH_3O$                                  | -0.26 | 310056   | 5.1    |

|    |           |           |                                         |       |         |      |
|----|-----------|-----------|-----------------------------------------|-------|---------|------|
| 1+ | 1142.5796 | 1142.5788 | $Z_{3\alpha}^{\bullet}-CH_3$            | 0.76  | 256130  | 4.3  |
| 1+ | 1156.5933 | 1156.5944 | $Z_{3\alpha}$                           | -0.97 | 1035269 | 17.2 |
| 1+ | 1172.5910 | 1172.5893 | $Y_{3\alpha}^{\ddagger}$                | 1.45  | 705345  | 11.7 |
| 1+ | 1202.5989 | 1202.5999 | $^{1,5}X_{3\alpha}$                     | -0.77 | 3627753 | 58.4 |
| 1+ | 1435.6915 | 1435.6927 | $^{1,5}A_4^{\ddagger}$                  | -0.83 | 479304  | 7.2  |
| 1+ | 1437.7065 | 1437.7084 | $^{1,5}A_4$                             | -1.30 | 1122125 | 16.9 |
| 1+ | 1467.6816 | 1467.6826 | $C_4^{\bullet}-CH_3$                    | -0.63 | 598791  | 8.6  |
| 1+ | 1481.6978 | 1481.6982 | $C_4^{\ddagger}$                        | -0.27 | 3995069 | 57.6 |
| 1+ | 1520.7667 | 1520.7676 | $Z_{4\alpha',3\beta}^{\bullet}-C_2H_5O$ | -0.62 | 632160  | 9.1  |
| 1+ | 1534.7799 | 1534.7834 | $Z_{4\alpha',3\beta}^{\bullet}-CH_3O$   | -2.26 | 1236467 | 17.8 |
| 1+ | 1550.7754 | 1550.7783 | $Z_{4\alpha',3\beta}^{\bullet}-CH_3$    | -1.88 | 775358  | 11.2 |
| 1+ | 1564.7940 | 1564.7939 | $Z_{4\alpha',3\beta}$                   | 0.02  | 1838389 | 25.5 |
| 1+ | 1580.7874 | 1580.7888 | $Y_{4\alpha',3\beta}^{\ddagger}$        | -0.94 | 686319  | 9.5  |
| 1+ | 1582.8011 | 1582.8045 | $Y_{4\alpha',3\beta}$                   | -2.16 | 539158  | 7.5  |
| 1+ | 1610.7975 | 1610.7994 | $^{1,5}X_{4\alpha',3\beta}$             | -1.19 | 2144525 | 29.8 |
| 1+ | 1710.8273 | 1710.8296 | $B_5$                                   | -1.33 | 1049794 | 13.7 |
| 1+ | 1768.8890 | 1768.8937 | $Z_{4\alpha'',5\alpha',4\beta}$         | -2.64 | 262411  | 3.4  |
| 1+ | 1814.8954 | 1814.8992 | $^{1,5}X_{4\alpha'',5\alpha',4\beta}$   | -2.11 | 890385  | 11.6 |
| 1+ | 1972.9933 | 1972.9935 | $M-CH_4O$                               | -0.09 | 488415  | 6.0  |
| 1+ | 2005.0141 | 2005.0197 | $M$                                     | -2.78 | 4057732 | 50.0 |

**Table S7.** List of assigned EED fragments in Figure 4c. All fragments are sodium adducts unless labeled otherwise. Multiple assignments are separated by commas;  $\omega$  indicates harmonics; the double dagger symbol ( $\ddagger$ ) indicates that the fragment has two fewer hydrogens than the canonical structures; the double prime symbol ( $''$ ) indicates that the fragment has two more hydrogens than the canonical structure; the dot symbol ( $\cdot$ ) indicates a radical.

| $z$ | Exptl. $m/z$ | Theo. $m/z$ | Assignment                                                                      | $\Delta$ ppm | Intensity | S/N   |
|-----|--------------|-------------|---------------------------------------------------------------------------------|--------------|-----------|-------|
| 1+  | 211.0939     | 211.0941    | $B_1\cdot$ -CH <sub>3</sub> O                                                   | -0.73        | 4312810   | 75.9  |
| 1+  | 227.0889     | 227.0890    | $C_1\cdot$ -CH <sub>3</sub> O                                                   | -0.55        | 7412889   | 128.2 |
| 1+  | 241.1045     | 241.1046    | $B_1$                                                                           | -0.48        | 1370988   | 23.3  |
| 1+  | 243.0838     | 243.0839    | $C_1\cdot$ -CH <sub>3</sub> , $C_{2\beta}$ , $2\alpha''/Y_{5\beta}$ , $5\alpha$ | -0.53        | 7675213   | 130.6 |
| 1+  | 257.0994     | 257.0996    | $C_1\ddagger$                                                                   | -0.46        | 2375195   | 39.7  |
| 1+  | 259.1151     | 259.1152    | $C_1$                                                                           | -0.50        | 1136401   | 40.2  |
| 1+  | 269.1581     | 269.1582    | $Z_1\cdot$ -CH <sub>3</sub> O                                                   | -0.24        | 5810771   | 98.6  |
| 1+  | 285.1531     | 285.1531    | $Z_1\cdot$ -CH <sub>3</sub>                                                     | -0.08        | 3273250   | 54.6  |
| 1+  | 299.1688     | 299.1687    | $Z_1$                                                                           | 0.25         | 4726915   | 77.1  |
| 1+  | 315.1414     | 315.1414    | $^{1,3}A_{2\alpha',2\beta}$ , $^{2,4}A_{2\alpha',2\beta}$                       | 0.02         | 2473658   | 39.3  |
| 1+  | 315.1637     | 315.1637    | $Y_1\ddagger$                                                                   | 0.23         | 1972634   | 31.3  |
| 1+  | 317.1793     | 317.1793    | $Y_1$                                                                           | -0.03        | 17629158  | 280.1 |
| 1+  | 345.1742     | 345.1742    | $^{1,5}X_1$                                                                     | 0.05         | 7754856   | 120.8 |
| 1+  | 401.1782     | 401.1781    | $C_{2\alpha',2\beta}\cdot$ -C <sub>2</sub> H <sub>5</sub> O <sub>2</sub>        | 0.14         | 1532910   | 24.0  |
| 1+  | 414.2322     | 414.2321    | $^{0,2}X_1$                                                                     | 0.24         | 575320    | 8.9   |
| 1+  | 415.1940     | 415.1939    | $^{1,5}A_{2\alpha',2\beta}\ddagger$                                             | 0.38         | 1795182   | 27.6  |
| 1+  | 417.1730     | 417.1732    | $C_{2\alpha',2\beta}\cdot$ -C <sub>2</sub> H <sub>5</sub> O                     | -0.34        | 1291490   | 19.9  |
| 1+  | 417.2096     | 417.2095    | $^{1,5}A_{2\alpha',2\beta}$                                                     | 0.16         | 1694285   | 26.1  |
| 1+  | 429.1730     | 429.1731    | $C_{2\alpha',2\beta}\ddagger$ -CH <sub>3</sub> O                                | -0.28        | 1435573   | 21.8  |
| 1+  | 431.1888     | 431.1888    | $C_{2\alpha',2\beta}\cdot$ -CH <sub>3</sub> O                                   | -0.02        | 8642389   | 131.5 |
| 1+  | 445.2044     | 445.2044    | $B_{2\alpha',2\beta}$                                                           | 0.00         | 7177136   | 107.2 |
| 1+  | 447.1837     | 447.1837    | $C_{2\alpha',2\beta}\cdot$ -CH <sub>3</sub>                                     | -0.05        | 1715162   | 25.6  |
| 1+  | 461.1993     | 461.1993    | $C_{2\alpha',2\beta}\ddagger$                                                   | -0.09        | 22590436  | 332.6 |
| 1+  | 463.2150     | 463.2150    | $C_{2\alpha',2\beta}$                                                           | 0.06         | 5418068   | 78.7  |
| 1+  | 484.2741     | 484.2740    | $Z_2\cdot$ -C <sub>2</sub> H <sub>5</sub> O <sub>2</sub>                        | 0.19         | 1391920   | 20.0  |
| 1+  | 505.2258     | 505.2255    | $^{0,4}A_{3\alpha'}$                                                            | 0.54         | 7307940   | 102.9 |
| 1+  | 514.2846     | 514.2845    | $Z_2\cdot$ -CH <sub>3</sub> O                                                   | 0.20         | 11505350  | 161.0 |
| 1+  | 519.2414     | 519.2412    | $^{1,3}A_{3\beta}$ or $^{2,4}A_{3\beta}$                                        | 0.33         | 1447705   | 20.3  |
| 1+  | 527.2077     | 527.2076    | $^{0,4}A_{3\alpha'} + 2Na - H$                                                  | 0.31         | 9911296   | 318.4 |

|    |           |           |                                                               |       |          |         |
|----|-----------|-----------|---------------------------------------------------------------|-------|----------|---------|
| 1+ | 530.2796  | 530.2794  | Z <sub>2</sub> <sup>*</sup> -CH <sub>3</sub>                  | 0.23  | 2697415  | 37.5    |
| 1+ | 533.2571  | 533.2568  | <sup>3,5</sup> A <sub>3α'</sub>                               | 0.45  | 4898734  | 68.1    |
| 1+ | 544.2955  | 544.2951  | Z <sub>2</sub>                                                | 0.80  | 6585251  | 91.1    |
| 1+ | 560.2894  | 560.2900  | Y <sub>2</sub> <sup>‡</sup>                                   | -1.13 | 1183909  | 16.3    |
| 1+ | 562.3058  | 562.3056  | Y <sub>2</sub>                                                | 0.34  | 3457909  | 47.7    |
| 1+ | 590.3008  | 590.3005  | <sup>1,5</sup> X <sub>2</sub>                                 | 0.36  | 17784598 | 241.7   |
| 2+ | 612.7945  | 612.7945  | <sup>1,5</sup> X <sub>3α</sub>                                | -0.04 | 328345   | 4.4     |
| 1+ | 618.3321  | 618.3318  | <sup>0,2</sup> X <sub>2</sub>                                 | 0.46  | 630549   | 8.5     |
| 1+ | 635.2888  | 635.2885  | C <sub>3α'</sub> /Z <sub>4α''</sub>                           | 0.33  | 7318534  | 97.4    |
| 1+ | 651.2840  | 651.2835  | C <sub>3α'</sub> /Y <sub>4α''</sub>                           | 0.79  | 1433059  | 18.8    |
| 1+ | 734.3794  | 734.3792  | Y <sub>3α</sub> /Z <sub>3β</sub>                              | 0.29  | 3204971  | 39.0    |
| 2+ | 788.3723  | 788.3725  | <sup>3,5</sup> A <sub>5</sub>                                 | -0.25 | 433420   | 4.8     |
| 2+ | 793.8892  | 793.8916  | Z <sub>4α', 3β</sub>                                          | -3.01 | 637928   | 7.1     |
| 2+ | 800.8806  | 800.8812  | <sup>1,5</sup> X <sub>4α', 3β</sub>                           | -0.77 | 604240   | 6.4     |
| 1+ | 809.3777  | 809.3777  | C <sub>3α</sub> <sup>*</sup> -C <sub>2</sub> H <sub>5</sub> O | 0.04  | 1032968  | 10.9    |
| 2+ | 816.8945  | 816.8943  | <sup>1,5</sup> X <sub>3β</sub>                                | 0.24  | 3950350  | 41.7    |
| 1+ | 825.4093  | 825.4091  | <sup>1,5</sup> A <sub>3α</sub>                                | 0.30  | 1604466  | 16.9    |
| 1+ | 839.3914  | 839.3883  | C <sub>3α</sub> <sup>*</sup> -CH <sub>3</sub> O               | 3.67  | 543964   | 5.5     |
| 1+ | 855.3865  | 855.3832  | C <sub>3α</sub> <sup>*</sup> -CH <sub>3</sub>                 | 3.85  | 652646   | 6.6     |
| 1+ | 869.3986  | 869.3989  | C <sub>3α</sub> <sup>‡</sup>                                  | -0.31 | 3237171  | 32.7    |
| 1+ | 871.4168  | 871.4145  | C <sub>3α</sub>                                               | 2.65  | 1151423  | 11.2    |
| 2+ | 895.9408  | 895.9415  | Z <sub>4α'', 5α', 4β</sub>                                    | -0.70 | 4714825  | 45.9    |
| 1+ | 913.4253  | 913.4251  | <sup>0,4</sup> A <sub>4</sub>                                 | 0.19  | 4153723  | 39.5    |
| 2+ | 918.9297  | 918.9331  | <sup>0,3</sup> A <sub>6</sub>                                 | -3.74 | 1850811  | 17.6    |
| 2+ | 918.9445  | 918.9442  | <sup>1,5</sup> X <sub>4α'', 5α', 4β</sub>                     | 0.27  | 11906868 | 113.4   |
| 2+ | 932.9604  | 932.9599  | <sup>0,2</sup> X <sub>4α'', 5α', 4β</sub>                     | 0.56  | 854613   | 8.1     |
| 2+ | 940.9506  | 940.9462  | <sup>0,2</sup> A <sub>6</sub>                                 | 4.66  | 2946282  | 28.0    |
| 1+ | 941.4571  | 941.4564  | <sup>3,5</sup> A <sub>4</sub>                                 | 0.70  | 2302433  | 21.9    |
| 2+ | 976.9861  | 976.9861  | <sup>0,4</sup> X <sub>4α'', 5α', 4β</sub>                     | 0.02  | 4376939  | 41.0    |
| 2+ | 1014.0041 | 1014.0045 | M                                                             | -0.36 | 1.72E+09 | 16042.1 |
| 1+ | 1043.4879 | 1043.4881 | C <sub>4</sub> /Z <sub>3β</sub>                               | -0.23 | 10055260 | 93.5    |
| 1+ | 1126.5818 | 1126.5838 | Z <sub>3α</sub> <sup>*</sup> -CH <sub>3</sub> O               | -1.85 | 371794   | 3.4     |
| 1+ | 1142.5780 | 1142.5788 | Z <sub>3α</sub> <sup>*</sup> -CH <sub>3</sub>                 | -0.65 | 637457   | 5.8     |
| 1+ | 1156.5913 | 1156.5944 | Z <sub>3α</sub>                                               | -2.66 | 814608   | 7.5     |
| 1+ | 1172.5905 | 1172.5893 | Y <sub>3α</sub> <sup>‡</sup>                                  | 1.03  | 1130909  | 10.4    |

|    |           |           |                                          |       |         |      |
|----|-----------|-----------|------------------------------------------|-------|---------|------|
| 1+ | 1202.5999 | 1202.5999 | $^{1,5}\chi_{3\alpha}$                   | 0.04  | 4043076 | 36.6 |
| 1+ | 1435.6945 | 1435.6927 | $^{1,5}A_4^\ddagger$                     | 1.21  | 651505  | 5.6  |
| 1+ | 1437.7070 | 1437.7084 | $^{1,5}A_4$                              | -0.94 | 1490058 | 12.8 |
| 1+ | 1451.6859 | 1451.6876 | $C_4^\bullet-CH_3O$                      | -1.17 | 918824  | 7.7  |
| 1+ | 1467.6832 | 1467.6826 | $C_4^\bullet-CH_3$                       | 0.44  | 818793  | 6.8  |
| 1+ | 1481.6989 | 1481.6982 | $C_4^\ddagger$                           | 0.46  | 6477604 | 54.0 |
| 1+ | 1534.7833 | 1534.7834 | $Z_{4\alpha',3\beta}^\bullet-CH_3O$      | -0.06 | 1356381 | 11.3 |
| 1+ | 1550.7776 | 1550.7783 | $Z_{4\alpha',3\beta}^\bullet-CH_3$       | -0.46 | 1070269 | 8.9  |
| 1+ | 1564.7962 | 1564.7939 | $Z_{4\alpha',3\beta}$                    | 1.45  | 1637605 | 13.1 |
| 1+ | 1580.7890 | 1580.7888 | $Y_{4\alpha',3\beta}^\ddagger$           | 0.11  | 1143657 | 9.2  |
| 1+ | 1610.7979 | 1610.7994 | $^{1,5}\chi_{4\alpha',3\beta}$           | -0.93 | 2792559 | 22.4 |
| 1+ | 1710.8293 | 1710.8296 | $B_5$                                    | -0.16 | 1717779 | 13.2 |
| 1+ | 1768.8935 | 1768.8937 | $Z_{4\alpha'',5\alpha',4\beta}$          | -0.12 | 626023  | 4.8  |
| 1+ | 1814.8969 | 1814.8992 | $^{1,5}\chi_{4\alpha'',5\alpha',4\beta}$ | -1.27 | 1124511 | 8.6  |
| 1+ | 1930.9817 | 1930.9829 | $^{0,4}\chi_{4\alpha'',5\alpha',4\beta}$ | -0.65 | 299859  | 2.2  |
| 1+ | 1972.9921 | 1972.9935 | $M-CH_4O$                                | -0.69 | 665589  | 4.9  |
| 1+ | 2005.0188 | 2005.0197 | $M$                                      | -0.47 | 5626437 | 41.4 |



**Table S8.** List of assigned EED fragments in Figure 4d. All fragments are sodium adducts unless labeled otherwise. Multiple assignments are separated by commas;  $\omega$  indicates harmonics; the double dagger symbol ( $\ddagger$ ) indicates that the fragment has two fewer hydrogens than the canonical structures; the double prime symbol ( $''$ ) indicates that the fragment has two more hydrogens than the canonical structure; the dot symbol ( $\cdot$ ) indicates a radical.

| $z$ | Exptl. $m/z$ | Theo. $m/z$ | Assignment                                                      | $\Delta$ ppm | Intensity | $S/N$ |
|-----|--------------|-------------|-----------------------------------------------------------------|--------------|-----------|-------|
| 1+  | 211.0939     | 211.0941    | $B_1\cdot$ -CH <sub>3</sub> O                                   | -0.73        | 4594087   | 131.4 |
| 1+  | 227.0889     | 227.089     | $C_1\cdot$ -CH <sub>3</sub> O                                   | -0.59        | 15503128  | 428.3 |
| 1+  | 241.1045     | 241.1046    | $B_1$                                                           | -0.56        | 1525854   | 42.4  |
| 1+  | 243.0838     | 243.0839    | $C_1\cdot$ -CH <sub>3</sub> , $C_{2\beta}\ddagger/Y_{5\beta}$   | -0.53        | 9149023   | 253.9 |
| 1+  | 255.1424     | 255.1424    | $Z_1\ddagger$ -C <sub>2</sub> H <sub>5</sub> O                  | -0.11        | 824204    | 22.6  |
| 1+  | 257.0995     | 257.0996    | $C_1\ddagger$                                                   | -0.31        | 4425565   | 121.3 |
| 1+  | 259.1151     | 259.1152    | $C_1$                                                           | -0.54        | 2921008   | 171.1 |
| 1+  | 269.1582     | 269.1582    | $Z_1\cdot$ -CH <sub>3</sub> O                                   | -0.16        | 7002440   | 191.6 |
| 1+  | 285.1531     | 285.1531    | $Z_1\cdot$ -CH <sub>3</sub>                                     | -0.26        | 4167532   | 109.5 |
| 1+  | 296.1105     | 296.1105    | $B_5/^{1,5}X_2$                                                 | 0.01         | 1351565   | 35.3  |
| 1+  | 299.1689     | 299.1687    | $Z_1$                                                           | 0.39         | 5705639   | 148.9 |
| 1+  | 301.1257     | 301.1258    | $^{0,4}A_{2\alpha}$                                             | -0.21        | 3786775   | 99    |
| 1+  | 315.1414     | 315.1414    | $^{1,3}A_{2\alpha, 2\beta}$ , $^{2,4}A_{2\alpha, 2\beta}$       | 0.02         | 2813393   | 73.3  |
| 1+  | 315.1636     | 315.1637    | $Y_1\ddagger$                                                   | -0.09        | 2560997   | 66.8  |
| 1+  | 317.1793     | 317.1793    | $Y_1$                                                           | -0.12        | 19546054  | 509.5 |
| 1+  | 323.1077     | 323.1078    | $^{0,4}A_{2\alpha} + 2Na - H$                                   | -0.23        | 5212497   | 298.7 |
| 1+  | 329.1571     | 329.1571    | $^{3,5}A_{2\alpha}$                                             | -0.04        | 2743775   | 71.8  |
| 1+  | 345.1742     | 345.1742    | $^{1,5}X_1$                                                     | -0.07        | 8424097   | 218.7 |
| 1+  | 359.1683     | 359.1676    | $^{1,4}A_{2\alpha, 2\beta}$                                     | 1.70         | 238718    | 6.2   |
| 1+  | 371.1676     | 371.1676    | $B_{2\beta}/^{0,4}X_{4\beta}$                                   | -0.08        | 2123097   | 54.7  |
| 1+  | 385.1834     | 385.1833    | $B_{2\beta}\cdot$ -C <sub>2</sub> H <sub>5</sub> O <sub>2</sub> | 0.16         | 4778245   | 120.4 |
| 1+  | 387.199      | 387.199     | $^{1,5}A_{2\beta} - CH_3O$                                      | 0.15         | 793843    | 20    |
| 1+  | 401.1781     | 401.1781    | $C_{2\beta}\cdot$ -C <sub>2</sub> H <sub>5</sub> O <sub>2</sub> | 0.07         | 2310509   | 56.8  |
| 1+  | 415.194      | 415.1939    | $^{1,5}A_{2\beta}\ddagger$                                      | 0.30         | 6928051   | 167.9 |
| 1+  | 417.1731     | 417.1732    | $C_{2\beta}\cdot$ -C <sub>2</sub> H <sub>5</sub> O              | -0.15        | 1710442   | 41.5  |
| 1+  | 417.2095     | 417.2095    | $^{1,5}A_{2\beta}$                                              | 0.09         | 1874339   | 45.4  |
| 1+  | 429.1732     | 429.1731    | $C_{2\beta}\ddagger$ -CH <sub>3</sub> O                         | 0.20         | 1291027   | 31.1  |
| 1+  | 431.1887     | 431.1888    | $C_{2\beta}\cdot$ -CH <sub>3</sub> O, $C_{2\alpha}/Z_{4\alpha}$ | -0.20        | 17382242  | 419.1 |
| 1+  | 443.1888     | 443.1888    | $B_{2\beta}\ddagger$                                            | 0.03         | 349260    | 8.3   |

|    |          |          |                                                                                |       |          |       |
|----|----------|----------|--------------------------------------------------------------------------------|-------|----------|-------|
| 1+ | 445.2047 | 445.2044 | B <sub>2β</sub>                                                                | 0.54  | 5549172  | 131.9 |
| 1+ | 447.1837 | 447.1837 | C <sub>2β</sub> <sup>•</sup> -CH <sub>3</sub>                                  | 0.10  | 4357378  | 103.6 |
| 1+ | 458.2584 | 458.2583 | <sup>0,3</sup> X <sub>1</sub>                                                  | 0.31  | 693883   | 16.4  |
| 1+ | 459.184  | 459.1837 | B <sub>3β</sub> / <sup>1,5</sup> X <sub>5β</sub>                               | 0.78  | 614397   | 14.5  |
| 1+ | 461.1993 | 461.1993 | C <sub>2β</sub> <sup>‡</sup>                                                   | -0.18 | 11719190 | 276.6 |
| 1+ | 463.215  | 463.215  | C <sub>2β</sub>                                                                | -0.03 | 1458389  | 34.3  |
| 1+ | 484.2739 | 484.274  | Z <sub>2</sub> <sup>•</sup> -C <sub>2</sub> H <sub>5</sub> O <sub>2</sub>      | -0.12 | 1435577  | 33.3  |
| 1+ | 502.2846 | 502.2845 | Z <sub>2</sub> <sup>•</sup> -Ac                                                | 0.04  | 4205359  | 96.6  |
| 1+ | 514.2847 | 514.2845 | Z <sub>2</sub> <sup>•</sup> -CH <sub>3</sub> O                                 | 0.30  | 12804381 | 291.4 |
| 1+ | 519.2413 | 519.2412 | <sup>1,3</sup> A <sub>3β</sub> , <sup>2,4</sup> A <sub>3β</sub>                | 0.24  | 2137748  | 48.7  |
| 1+ | 530.2795 | 530.2794 | Z <sub>2</sub> <sup>•</sup> -CH <sub>3</sub>                                   | 0.06  | 3115772  | 70.3  |
| 1+ | 544.2953 | 544.2951 | Z <sub>2</sub>                                                                 | 0.47  | 6325363  | 141.6 |
| 1+ | 560.2904 | 560.29   | Y <sub>2</sub> <sup>‡</sup>                                                    | 0.75  | 1143262  | 25.3  |
| 1+ | 561.252  | 561.2518 | <sup>1,4</sup> A <sub>3β</sub> <sup>‡</sup>                                    | 0.33  | 715670   | 15.9  |
| 1+ | 562.3058 | 562.3056 | Y <sub>2</sub>                                                                 | 0.26  | 3137635  | 69.5  |
| 1+ | 590.3007 | 590.3005 | <sup>1,5</sup> X <sub>2</sub>                                                  | 0.23  | 21185914 | 457.3 |
| 1+ | 605.2781 | 605.2779 | C <sub>2α, 3β</sub> <sup>•</sup> -C <sub>2</sub> H <sub>5</sub> O <sub>2</sub> | 0.34  | 1411935  | 30.5  |
| 1+ | 619.2943 | 619.2936 | <sup>1,5</sup> A <sub>2α, 3β</sub> <sup>‡</sup>                                | 1.02  | 3618963  | 77    |
| 1+ | 621.2736 | 621.273  | C <sub>2α, 3β</sub> <sup>•</sup> -C <sub>2</sub> H <sub>5</sub> O              | 1.10  | 1526305  | 32.5  |
| 1+ | 621.3095 | 621.3093 | <sup>1,5</sup> A <sub>2α, 3β</sub>                                             | 0.29  | 2705293  | 57.6  |
| 1+ | 635.2891 | 635.2885 | C <sub>2α, 3β</sub> <sup>•</sup> -CH <sub>3</sub> O                            | 0.91  | 3341655  | 69.7  |
| 1+ | 647.2865 | 647.2885 | B <sub>2α, 3β</sub> <sup>‡</sup>                                               | -3.14 | 238135   | 4.9   |
| 1+ | 649.3049 | 649.3042 | B <sub>2α, 3β</sub>                                                            | 1.12  | 3634408  | 74.5  |
| 1+ | 651.284  | 651.2835 | C <sub>2α, 3β</sub> <sup>•</sup> -CH <sub>3</sub>                              | 0.90  | 1256385  | 25.8  |
| 1+ | 665.2992 | 665.2991 | C <sub>2α, 3β</sub> <sup>‡</sup>                                               | 0.14  | 16103262 | 326   |
| 1+ | 667.315  | 667.3148 | C <sub>2α, 3β</sub>                                                            | 0.32  | 4989881  | 101   |
| 2+ | 691.8412 | 691.8417 | Z <sub>3α, 3β</sub>                                                            | -0.68 | 285618   | 5.7   |
| 1+ | 707.3114 | 707.3097 | <sup>0,4</sup> A <sub>3</sub> <sup>‡</sup>                                     | 2.43  | 318401   | 6.3   |
| 1+ | 709.3254 | 709.3253 | <sup>0,4</sup> A <sub>3</sub>                                                  | 0.05  | 5227728  | 104.1 |
| 2+ | 714.8446 | 714.8444 | <sup>1,5</sup> X <sub>3α, 3β</sub>                                             | 0.28  | 2213369  | 43.2  |
| 1+ | 723.3411 | 723.341  | <sup>1,3</sup> A <sub>4β</sub> , <sup>2,4</sup> A <sub>4β</sub>                | 0.16  | 3224848  | 62.9  |
| 1+ | 731.3073 | 731.3073 | <sup>0,4</sup> A <sub>3</sub> + 2Na - H                                        | -0.03 | 10721002 | 461.8 |
| 1+ | 734.3795 | 734.3792 | Y <sub>3α</sub> /Z <sub>3β</sub>                                               | 0.37  | 3932710  | 76.7  |
| 1+ | 737.3569 | 737.3566 | <sup>3,5</sup> A <sub>3</sub>                                                  | 0.31  | 5316280  | 103.7 |

|    |          |          |                                         |       |          |       |
|----|----------|----------|-----------------------------------------|-------|----------|-------|
| 2+ | 816.8947 | 816.8943 | $^{1,5}X_{4\beta}$                      | 0.46  | 1643410  | 29.7  |
| 1+ | 839.3884 | 839.3883 | $C_4/Z_{3\beta}$                        | 0.04  | 12071547 | 212.5 |
| 2+ | 852.9088 | 852.912  | $^{1,5}A_4$                             | -3.69 | 416235   | 7.3   |
| 2+ | 866.9083 | 866.9094 | $B_4$                                   | -1.24 | 430826   | 7.6   |
| 1+ | 885.394  | 885.3938 | $C_4/^{1,5}X_{3\beta}$                  | 0.19  | 462695   | 7.9   |
| 2+ | 895.9404 | 895.9415 | $Z_{4\alpha, 5\beta}$                   | -1.14 | 3317514  | 56.7  |
| 2+ | 918.9443 | 918.9442 | $^{1,5}X_{4\alpha, 5\beta}$             | 0.06  | 10079623 | 167.5 |
| 2+ | 932.9601 | 932.9599 | $^{0,2}X_{4\alpha, 5\beta}$             | 0.25  | 966361   | 16.1  |
| 2+ | 940.9453 | 940.9462 | $^{0,2}A_5$                             | -0.96 | 619365   | 10.3  |
| 2+ | 976.9863 | 976.9861 | $^{0,4}X_{4\alpha, 5\beta}$             | 0.23  | 4104121  | 66.8  |
| 1+ | 995.466  | 995.467  | $^{1,5}A_5$                             | -0.96 | 211553   | 3.4   |
| 1+ | 1247.588 | 1247.588 | $C_4/Z_{4\alpha}$                       | 0.30  | 866362   | 12.8  |
| 1+ | 1316.669 | 1316.668 | $Z_{3\alpha, 3\beta}^{\bullet}-C_2H_5O$ | 0.59  | 988762   | 14.2  |
| 1+ | 1330.683 | 1330.684 | $Z_{3\alpha, 3\beta}^{\bullet}-CH_3O$   | -0.76 | 2538331  | 36.3  |
| 1+ | 1346.681 | 1346.679 | $Z_{3\alpha, 3\beta}^{\bullet}-CH_3$    | 1.46  | 1443757  | 20.7  |
| 1+ | 1360.696 | 1360.694 | $Z_{3\alpha, 3\beta}$                   | 1.28  | 2932544  | 40.7  |
| 1+ | 1376.691 | 1376.689 | $Y_{3\alpha, 3\beta}^{\ddagger}$        | 1.63  | 1852947  | 25.7  |
| 1+ | 1378.704 | 1378.705 | $Y_{3\alpha, 3\beta}$                   | -0.46 | 417607   | 5.8   |
| 1+ | 1406.7   | 1406.7   | $^{1,5}X_{3\alpha, 3\beta}$             | -0.04 | 5628905  | 78.2  |
| 1+ | 1435.695 | 1435.693 | $^{1,5}A_4^{\ddagger}$                  | 1.44  | 685397   | 9.5   |
| 1+ | 1437.708 | 1437.708 | $^{1,5}A_4$                             | -0.27 | 2062070  | 28.6  |
| 1+ | 1451.688 | 1451.688 | $C_4^{\bullet}-CH_3O$                   | 0.16  | 1075615  | 14.4  |
| 1+ | 1467.682 | 1467.683 | $C_4^{\bullet}-CH_3$                    | -0.69 | 1002850  | 13.5  |
| 1+ | 1481.699 | 1481.698 | $C_4^{\ddagger}$                        | 0.80  | 6322948  | 84.8  |
| 1+ | 1534.782 | 1534.783 | $Z_{4\beta}^{\bullet}-CH_3O$            | -0.76 | 762791   | 10.2  |
| 1+ | 1550.777 | 1550.778 | $Z_{4\beta}^{\bullet}-CH_3$             | -1.05 | 2209302  | 29.6  |
| 1+ | 1564.794 | 1564.794 | $Z_{4\beta}$                            | 0.21  | 1133744  | 15.2  |
| 1+ | 1580.79  | 1580.789 | $Y_{4\beta}^{\ddagger}$                 | 0.46  | 1233418  | 15.9  |
| 1+ | 1610.799 | 1610.799 | $^{1,5}X_{4\beta}$                      | -0.48 | 1924410  | 24.8  |
| 1+ | 1710.829 | 1710.83  | $B_5$                                   | -0.46 | 1543853  | 18.9  |
| 1+ | 1728.84  | 1728.84  | $C_5$                                   | 0.13  | 171242   | 2.1   |
| 1+ | 1738.885 | 1738.883 | $Z_{4\alpha}^{\bullet}-CH_3O$           | 0.81  | 378986   | 4.6   |
| 1+ | 1768.896 | 1768.894 | $Z_{4\alpha, 5\beta}$                   | 1.11  | 311446   | 3.8   |
| 1+ | 1784.885 | 1784.889 | $Y_{4\alpha, 5\beta}^{\ddagger}$        | -1.98 | 296330   | 3.6   |

|    |          |          |                                                |       |         |      |
|----|----------|----------|------------------------------------------------|-------|---------|------|
| 1+ | 1814.899 | 1814.899 | $^{1,5}\chi_{4\alpha, 5\beta}$                 | -0.16 | 1096319 | 13.4 |
| 1+ | 1930.982 | 1930.983 | $^{0,4}\chi_{4\alpha, 5\beta}$                 | -0.62 | 325811  | 3.8  |
| 1+ | 1942.98  | 1942.983 | M-C <sub>2</sub> H <sub>6</sub> O <sub>2</sub> | -1.58 | 287338  | 3.3  |
| 1+ | 1958.979 | 1958.978 | M-C <sub>2</sub> H <sub>6</sub> O              | 0.62  | 356494  | 4.1  |
| 1+ | 1972.994 | 1972.993 | M-CH <sub>4</sub> O                            | 0.33  | 596513  | 6.9  |
| 1+ | 2005.018 | 2005.02  | M                                              | -0.78 | 5496154 | 63.6 |

**Table S9.** List of assigned EED fragments in Figure 4e. All fragments are sodium adducts unless labeled otherwise. Multiple assignments are separated by commas;  $\omega$  indicates harmonics; the double dagger symbol ( $\ddagger$ ) indicates that the fragment has two fewer hydrogens than the canonical structures; the double prime symbol ( $''$ ) indicates that the fragment has two more hydrogens than the canonical structure; the dot symbol ( $\cdot$ ) indicates a radical.

| $z$ | Exptl. $m/z$ | Theo. $m/z$ | Assignment                                                                       | $\Delta$ ppm | Intensity | $S/N$ |
|-----|--------------|-------------|----------------------------------------------------------------------------------|--------------|-----------|-------|
| 1+  | 211.0940     | 211.0941    | $B_1\cdot$ -CH <sub>3</sub> O                                                    | -0.45        | 1203080   | 40.8  |
| 1+  | 227.0889     | 227.0890    | $C_1\cdot$ -CH <sub>3</sub> O                                                    | -0.37        | 3437079   | 113.4 |
| 1+  | 241.1045     | 241.1046    | $B_1$                                                                            | -0.72        | 450148    | 25.2  |
| 1+  | 243.0838     | 243.0839    | $C_1\cdot$ -CH <sub>3</sub> , $C_{2\beta, 2\alpha}^\ddagger/Y_{5\beta, 5\alpha}$ | -0.41        | 2336125   | 78.1  |
| 1+  | 259.1150     | 259.1152    | $C_1$                                                                            | -0.69        | 245683    | 10.7  |
| 1+  | 269.1581     | 269.1582    | $Z_1\cdot$ -CH <sub>3</sub> O                                                    | -0.27        | 1437579   | 45.9  |
| 1+  | 285.1531     | 285.1531    | $Z_1\cdot$ -CH <sub>3</sub>                                                      | -0.26        | 864759    | 27.3  |
| 1+  | 299.1689     | 299.1687    | $Z_1$                                                                            | 0.46         | 1033385   | 32.8  |
| 1+  | 315.1637     | 315.1637    | $Y_1^\ddagger$                                                                   | -0.03        | 782873    | 24.8  |
| 1+  | 317.1794     | 317.1793    | $Y_1$                                                                            | 0.35         | 4851238   | 154.0 |
| 1+  | 345.1742     | 345.1742    | $^{1,5}X_1$                                                                      | -0.01        | 1834612   | 56.9  |
| 1+  | 415.1925     | 415.1939    | $^{1,5}A_2^\ddagger$                                                             | -3.21        | 1224969   | 35.6  |
| 1+  | 417.2086     | 417.2095    | $^{1,5}A_2$                                                                      | -2.26        | 232399    | 6.8   |
| 1+  | 431.1887     | 431.1888    | $C_2\cdot$ -CH <sub>3</sub> O                                                    | -0.18        | 2501493   | 72.7  |
| 1+  | 445.2045     | 445.2044    | $B_2$                                                                            | 0.27         | 1635645   | 47.3  |
| 1+  | 447.1836     | 447.1837    | $C_2\cdot$ -CH <sub>3</sub>                                                      | -0.14        | 941784    | 27.2  |
| 1+  | 461.1991     | 461.1993    | $C_2^\ddagger$                                                                   | -0.48        | 4513437   | 130.0 |
| 1+  | 463.2151     | 463.2150    | $C_2$                                                                            | 0.27         | 748582    | 21.4  |
| 1+  | 502.2847     | 502.2845    | $Z_2''$ -C <sub>2</sub> H <sub>5</sub> O <sub>2</sub>                            | 0.30         | 3115160   | 86.2  |
| 1+  | 505.2256     | 505.2255    | $^{0,4}A_{3\alpha}$                                                              | 0.00         | 959460    | 26.6  |
| 1+  | 514.2846     | 514.2845    | $Z_2\cdot$ -CH <sub>3</sub> O                                                    | 0.07         | 2537556   | 69.9  |
| 1+  | 519.2416     | 519.2412    | $^{1,3}A_{3\beta}, ^{2,4}A_{3\beta}$                                             | 0.72         | 465555    | 12.8  |
| 1+  | 527.2075     | 527.2076    | $^{0,4}A_{3\alpha} + 2Na - H$                                                    | -0.13        | 797492    | 41.9  |
| 1+  | 533.2569     | 533.2568    | $^{3,5}A_{3\alpha}$                                                              | 0.04         | 1243467   | 34.0  |
| 1+  | 544.2956     | 544.2951    | $Z_2$                                                                            | 0.94         | 1536277   | 41.7  |
| 1+  | 562.3057     | 562.3056    | $Y_2$                                                                            | 0.16         | 604405    | 16.4  |
| 1+  | 590.3007     | 590.3005    | $^{1,5}X_2$                                                                      | 0.21         | 2984647   | 80.3  |
| 1+  | 619.2942     | 619.2936    | $^{1,5}A_{3\alpha, 3\beta}^\ddagger$                                             | 0.89         | 1024914   | 27.3  |
| 1+  | 635.2888     | 635.2885    | $C_3\cdot$ -CH <sub>3</sub> O                                                    | 0.37         | 1245750   | 32.7  |

|    |           |           |                                                                 |       |          |        |
|----|-----------|-----------|-----------------------------------------------------------------|-------|----------|--------|
| 1+ | 649.3049  | 649.3042  | B <sub>3</sub>                                                  | 1.07  | 908090   | 23.6   |
| 1+ | 651.2836  | 651.2835  | C <sub>3</sub> <sup>•</sup> -CH <sub>3</sub>                    | 0.19  | 339807   | 8.8    |
| 1+ | 665.2993  | 665.2991  | C <sub>3</sub> <sup>‡</sup>                                     | 0.25  | 4503148  | 115.1  |
| 1+ | 667.3150  | 667.3148  | C <sub>3</sub>                                                  | 0.32  | 1016177  | 26.0   |
| 1+ | 709.3253  | 709.3253  | <sup>0,4</sup> A <sub>4</sub>                                   | -0.02 | 1681420  | 42.3   |
| 2+ | 714.8443  | 714.8444  | <sup>1,5</sup> X <sub>3α, 3β</sub>                              | -0.15 | 326085   | 8.1    |
| 1+ | 723.3412  | 723.3410  | <sup>1,3</sup> A <sub>4β</sub> , <sup>2,4</sup> A <sub>4β</sub> | 0.30  | 269429   | 6.7    |
| 1+ | 731.3073  | 731.3073  | <sup>0,4</sup> A <sub>4</sub> + 2Na - H                         | -0.03 | 2711610  | 142.0  |
| 1+ | 734.3794  | 734.3792  | Y <sub>3α</sub> /Z <sub>3β</sub>                                | 0.30  | 1006051  | 24.9   |
| 1+ | 737.3569  | 737.3566  | <sup>3,5</sup> A <sub>4</sub>                                   | 0.40  | 1065106  | 26.4   |
| 2+ | 753.3532  | 753.3515  | C <sub>4</sub>                                                  | 2.21  | 222815   | 5.4    |
| 1+ | 765.3513  | 765.3515  | <sup>1,4</sup> A <sub>4β</sub> <sup>‡</sup>                     | -0.32 | 148770   | 3.6    |
| 2+ | 816.8942  | 816.8943  | <sup>1,5</sup> X <sub>4α, 4β</sub>                              | -0.17 | 785383   | 18.2   |
| 1+ | 839.3883  | 839.3883  | C <sub>4</sub> /Z <sub>3β</sub>                                 | 0.02  | 3887717  | 88.2   |
| 2+ | 866.9075  | 866.9094  | B <sub>5</sub>                                                  | -2.23 | 149525   | 3.4    |
| 2+ | 895.9377  | 895.9415  | Z <sub>5α, 5β</sub>                                             | -4.19 | 395067   | 8.7    |
| 2+ | 903.9387  | 903.9411  | Y <sub>5α, 5β</sub> <sup>‡</sup>                                | -2.71 | 700217   | 15.4   |
| 2+ | 918.9444  | 918.9442  | <sup>1,5</sup> X <sub>5α, 5β</sub>                              | 0.20  | 1661473  | 35.4   |
| 2+ | 947.9642  | 947.9651  | <sup>1,4</sup> X <sub>5α, 5β</sub>                              | -0.97 | 139132   | 3.0    |
| 2+ | 1014.0047 | 1014.0045 | M                                                               | 0.21  | 53525336 | 1067.8 |
| 1+ | 1330.6782 | 1330.6836 | Z <sub>3α, 3β</sub> <sup>•</sup> -CH <sub>3</sub> O             | -4.10 | 343969   | 6.0    |
| 1+ | 1360.6920 | 1360.6942 | Z <sub>3α, 3β</sub>                                             | -1.58 | 768870   | 23.7   |
| 1+ | 1376.6899 | 1376.6891 | Y <sub>3α, 3β</sub> <sup>‡</sup>                                | 0.61  | 388145   | 6.5    |
| 1+ | 1406.7003 | 1406.6996 | <sup>1,5</sup> X <sub>3α, 3β</sub>                              | 0.45  | 1047642  | 17.5   |
| 1+ | 1451.6835 | 1451.6876 | C <sub>4</sub> <sup>•</sup> -CH <sub>3</sub> O                  | -2.84 | 147463   | 2.4    |
| 1+ | 1481.6998 | 1481.6982 | C <sub>4</sub> <sup>‡</sup>                                     | 1.09  | 1315539  | 21.0   |
| 1+ | 1550.7756 | 1550.7783 | Z <sub>4α, 4β</sub> <sup>•</sup> -CH <sub>3</sub>               | -1.72 | 252321   | 4.0    |
| 1+ | 1564.7894 | 1564.7939 | Z <sub>4α, 4β</sub>                                             | -2.92 | 179174   | 2.7    |
| 1+ | 1580.7870 | 1580.7888 | Y <sub>4α, 4β</sub> <sup>‡</sup>                                | -1.16 | 178413   | 2.7    |
| 1+ | 1610.7993 | 1610.7994 | <sup>1,5</sup> X <sub>4α, 4β</sub>                              | -0.06 | 887038   | 26.3   |
| 1+ | 1710.8290 | 1710.8296 | B <sub>5</sub>                                                  | -0.33 | 336340   | 4.8    |
| 1+ | 1726.8226 | 1726.8245 | C <sub>5</sub> <sup>‡</sup>                                     | -1.10 | 169588   | 2.4    |
| 1+ | 1814.8987 | 1814.8992 | <sup>1,5</sup> X <sub>5α, 5β</sub>                              | -0.25 | 199522   | 2.9    |
| 1+ | 2005.0177 | 2005.0197 | M                                                               | -0.99 | 1257983  | 17.1   |

**Table S10.** List of assigned EED fragments in Figure S1a. All fragments are sodium adducts unless labeled otherwise. Multiple assignments are separated by commas;  $\omega$  indicates harmonics; the double dagger symbol ( $\ddagger$ ) indicates that the fragment has two fewer hydrogens than the canonical structures; the double prime symbol ( $''$ ) indicates that the fragment has two more hydrogens than the canonical structure; the dot symbol ( $\cdot$ ) indicates a radical.

| $z$ | Exptl. $m/z$ | Theo. $m/z$ | Assignment                      | $\Delta$ ppm | Intensity | $S/N$ |
|-----|--------------|-------------|---------------------------------|--------------|-----------|-------|
| 1+  | 227.0889     | 227.0890    | $C_1^{\cdot}-CH_3O$ , $C_4/Z_3$ | -0.46        | 1380016   | 38.1  |
| 1+  | 243.0838     | 243.0839    | $C^{\ddagger}/Y$ (Hex)          | -0.45        | 1115815   | 30.9  |
| 1+  | 269.1581     | 269.1582    | $Z_1^{\cdot}-CH_3O$             | -0.41        | 804009    | 42.4  |
| 1+  | 299.1687     | 299.1687    | $Z_1$                           | -0.18        | 777119    | 39.9  |
| 1+  | 315.1413     | 315.1414    | $^{1,3}A_2$ , $^{2,4}A_2$       | -0.55        | 228402    | 7.6   |
| 1+  | 317.1792     | 317.1793    | $Y_1$                           | -0.41        | 1742926   | 45.9  |
| 1+  | 345.1742     | 345.1742    | $^{1,5}X_1$                     | -0.21        | 863069    | 22.3  |
| 1+  | 415.1936     | 415.1939    | $^{1,5}A_2^{\ddagger}$          | -0.54        | 540035    | 23.6  |
| 1+  | 431.1886     | 431.1888    | $C_2^{\cdot}-CH_3O$             | -0.39        | 1117818   | 27.6  |
| 1+  | 445.2042     | 445.2044    | $B_2$                           | -0.56        | 669895    | 30.1  |
| 1+  | 447.1834     | 447.1837    | $C_2^{\cdot}-CH_3$              | -0.66        | 484771    | 11.7  |
| 1+  | 461.1992     | 461.1993    | $C_2^{\ddagger}$                | -0.40        | 853759    | 20.6  |
| 1+  | 500.2690     | 500.2688    | $Z_2^{\cdot}-C_2H_5O$           | 0.52         | 967526    | 29.9  |
| 1+  | 502.2841     | 502.2845    | $Z_2^{\cdot}-Ac$                | -0.78        | 710202    | 16.6  |
| 1+  | 514.2843     | 514.2845    | $Z_2^{\cdot}-CH_3O$             | -0.46        | 1067378   | 24.7  |
| 1+  | 519.2412     | 519.2412    | $^{1,3}A_3$ , $^{2,4}A_3$       | -0.08        | 267994    | 8.1   |
| 1+  | 544.2948     | 544.2951    | $Z_2$                           | -0.51        | 887160    | 20.1  |
| 1+  | 590.3003     | 590.3005    | $^{1,5}X_2$                     | -0.42        | 1896463   | 41.8  |
| 1+  | 635.2882     | 635.2885    | $C_3^{\cdot}-CH_3O$             | -0.59        | 377332    | 8.1   |
| 1+  | 665.2992     | 665.2991    | $C_3^{\ddagger}$                | 0.19         | 1051164   | 22.1  |
| 2+  | 691.8414     | 691.8418    | $M-CH_4O$                       | -0.58        | 1282765   | 54.7  |
| 2+  | 707.8545     | 707.8548    | $M$                             | -0.49        | 28591048  | 595.4 |
| 1+  | 718.3834     | 718.3843    | $Z_3^{\cdot}-CH_3O$             | -1.25        | 306118    | 6.3   |
| 1+  | 748.3937     | 748.3948    | $Z_3$                           | -1.47        | 458452    | 9.4   |
| 1+  | 766.4043     | 766.4054    | $Y_3$                           | -1.44        | 364181    | 10.9  |
| 1+  | 794.3994     | 794.4003    | $^{1,5}X_3$                     | -1.21        | 525405    | 10.6  |
| 1+  | 869.3991     | 869.3989    | $C_4^{\ddagger}$                | 0.22         | 2158072   | 41.0  |
| 1+  | 938.4784     | 938.4790    | $Z_4^{\cdot}-CH_3$              | -0.66        | 240649    | 4.5   |
| 1+  | 998.4996     | 998.5001    | $^{1,5}X_4$                     | -0.51        | 459888    | 8.1   |
| 1+  | 1082.4988    | 1082.4990   | $C_5^{\ddagger\cdot}-CH_3O$     | -0.16        | 373709    | 6.4   |

|    |           |           |                               |       |        |      |
|----|-----------|-----------|-------------------------------|-------|--------|------|
| 1+ | 1098.5293 | 1098.5303 | B <sub>5</sub>                | -0.86 | 652854 | 11.1 |
| 1+ | 1202.5999 | 1202.5999 | <sup>1,5</sup> X <sub>5</sub> | 0.02  | 168187 | 2.7  |
| 1+ | 1392.7213 | 1392.7204 | M                             | 0.63  | 428883 | 9.2  |



**Table S11.** List of assigned EED fragments in Figure S1b. All fragments are sodium adducts unless labeled otherwise. Multiple assignments are separated by commas;  $\omega$  indicates harmonics; the double dagger symbol ( $\ddagger$ ) indicates that the fragment has two fewer hydrogens than the canonical structures; the double prime symbol ( $''$ ) indicates that the fragment has two more hydrogens than the canonical structure; the dot symbol ( $\cdot$ ) indicates a radical.

| $z$ | Exptl. $m/z$ | Theo. $m/z$ | Assignment                                    | $\Delta$ ppm | Intensity | $S/N$ |
|-----|--------------|-------------|-----------------------------------------------|--------------|-----------|-------|
| 1+  | 227.0890     | 227.0890    | $C_{1\alpha,1\beta}\cdot\text{-CH}_3\text{O}$ | -0.11        | 2783076   | 110.5 |
| 1+  | 241.1047     | 241.1046    | $B_{1\alpha,1\beta}$                          | 0.10         | 473571    | 15.6  |
| 1+  | 255.1426     | 255.1424    | $Z_1\cdot\text{-C}_2\text{H}_5\text{O}$       | 0.59         | 978952    | 17.6  |
| 1+  | 257.0996     | 257.0996    | $C_{1\alpha,1\beta}\ddagger$                  | 0.27         | 1790223   | 32.0  |
| 1+  | 259.1152     | 259.1152    | $C_{1\alpha,1\beta}$                          | -0.04        | 1343838   | 51.3  |
| 1+  | 269.1583     | 269.1582    | $Z_1\cdot\text{-CH}_3\text{O}$                | 0.25         | 4043355   | 71.5  |
| 1+  | 285.1532     | 285.1531    | $Z_1\cdot\text{-CH}_3$                        | 0.20         | 1427021   | 25.5  |
| 1+  | 299.1688     | 299.1687    | $Z_1$                                         | 0.22         | 6544182   | 116.1 |
| 1+  | 301.1258     | 301.1258    | ${}^{0,4}\text{A}_2$                          | 0.19         | 2462148   | 43.7  |
| 1+  | 315.1415     | 315.1414    | ${}^{1,3}\text{A}_2, {}^{2,4}\text{A}_2$      | 0.18         | 584720    | 10.2  |
| 1+  | 315.1638     | 315.1637    | $Y_1\ddagger$                                 | 0.29         | 1535230   | 26.8  |
| 1+  | 317.1794     | 317.1793    | $Y_1$                                         | 0.35         | 7380774   | 128.2 |
| 1+  | 323.1078     | 323.1078    | ${}^{0,4}\text{A}_2 + 2\text{Na} - \text{H}$  | 0.08         | 3237565   | 123.1 |
| 1+  | 329.1571     | 329.1571    | ${}^{3,5}\text{A}_2$                          | 0.08         | 2353812   | 40.4  |
| 1+  | 345.1743     | 345.1742    | ${}^{1,5}\text{X}_1$                          | 0.28         | 4975036   | 84.4  |
| 1+  | 414.2324     | 414.2321    | ${}^{0,2}\text{X}_1$                          | 0.74         | 316367    | 5.1   |
| 1+  | 431.1888     | 431.1888    | $C_2/Z_{4\beta}$                              | 0.17         | 4187774   | 68.1  |
| 1+  | 484.2741     | 484.2740    | $Z_2\cdot\text{-C}_2\text{H}_5\text{O}_2$     | 0.23         | 842143    | 13.5  |
| 1+  | 500.2104     | 500.2102    | $B_4/{}^{1,5}\text{X}_3$                      | 0.24         | 3041701   | 47.8  |
| 1   | 500.2688     | 500.2688    | $Z_2\cdot\text{-C}_2\text{H}_5\text{O}$       | 0.06         | 1006552   | 41.5  |
| 1+  | 502.2847     | 502.2845    | $Z_2\cdot\text{-Ac}$                          | 0.40         | 1720689   | 27.0  |
| 1+  | 514.2848     | 514.2845    | $Z_2\cdot\text{-CH}_3\text{O}$                | 0.49         | 5428147   | 84.0  |
| 1+  | 530.2796     | 530.2794    | $Z_2\cdot\text{-CH}_3$                        | 0.37         | 1170464   | 17.8  |
| 1+  | 544.2951     | 544.2951    | $Z_2$                                         | 0.04         | 4770224   | 71.7  |
| 1+  | 560.2892     | 560.2900    | $Y_2\ddagger$                                 | -1.34        | 308521    | 4.6   |
| 2+  | 560.7601     | 560.7598    | $B_{4\alpha,4\beta}$                          | 0.65         | 258632    | 3.8   |
| 1+  | 562.3058     | 562.3056    | $Y_2$                                         | 0.26         | 636280    | 9.4   |
| 2+  | 569.7655     | 569.7650    | $C_{4\alpha,4\beta}$                          | 0.87         | 1411412   | 20.7  |
| 2+  | 589.7918     | 589.7918    | $Z_{4\alpha,4\beta}$                          | 0.01         | 3816949   | 55.2  |
| 1+  | 590.3007     | 590.3005    | ${}^{1,5}\text{X}_2$                          | 0.23         | 4905638   | 70.9  |

|    |           |           |                              |       |          |        |
|----|-----------|-----------|------------------------------|-------|----------|--------|
| 2+ | 598.7978  | 598.7971  | $Y_{4\alpha,4\beta}$         | 1.19  | 641682   | 9.3    |
| 2+ | 612.7949  | 612.7945  | $^{1,5}X_{4\alpha,4\beta}$   | 0.52  | 9956921  | 142.1  |
| 1+ | 618.3325  | 618.3318  | $^{0,2}X_2$                  | 0.98  | 451548   | 6.4    |
| 1+ | 621.3095  | 621.3093  | $^{1,5}A_{2\alpha}$          | 0.42  | 920705   | 13.1   |
| 2+ | 626.8107  | 626.8102  | $^{0,2}X_{4\alpha,4\beta}$   | 0.74  | 574667   | 8.1    |
| 2+ | 634.7966  | 634.7965  | $^{0,2}A_5$                  | 0.09  | 1173677  | 16.5   |
| 1+ | 635.2887  | 635.2885  | $C_2^*-CH_3O$                | 0.26  | 1303094  | 18.3   |
| 1+ | 651.2844  | 651.2835  | $C_2^*-CH_3$                 | 1.39  | 566942   | 7.8    |
| 1+ | 665.3002  | 665.2991  | $C_2^\ddagger$               | 1.61  | 2167957  | 29.6   |
| 1+ | 667.3155  | 667.3148  | $C_2$                        | 1.07  | 1031088  | 14.1   |
| 2+ | 670.8372  | 670.8364  | $^{0,4}X_{4\alpha,4\beta}$   | 1.18  | 4429429  | 60.4   |
| 2+ | 707.8553  | 707.8548  | M                            | 0.65  | 2.06E+08 | 2777.7 |
| 1+ | 718.3852  | 718.3843  | $Z_3^*-CH_3O$                | 1.21  | 512838   | 6.8    |
| 1+ | 731.3075  | 731.3073  | $^{0,4}A_3 + 2Na - H$        | 0.27  | 2069570  | 58.5   |
| 1+ | 737.3572  | 737.3566  | $^{3,5}A_3$                  | 0.72  | 2580940  | 34.4   |
| 1+ | 748.3951  | 748.3948  | $Z_3$                        | 0.35  | 1087166  | 28.8   |
| 1+ | 764.3913  | 764.3898  | $Y_3^\ddagger$               | 2.05  | 1380350  | 18.2   |
| 1+ | 766.4062  | 766.4054  | $Y_3$                        | 1.06  | 484103   | 6.3    |
| 1+ | 794.4006  | 794.4003  | $^{1,5}X_3$                  | 0.34  | 4842378  | 63.0   |
| 1+ | 809.3783  | 809.3777  | $C_3^*-C_2H_5O_2$            | 0.82  | 481885   | 6.2    |
| 1+ | 823.3946  | 823.3934  | $^{1,5}A_3^\ddagger$         | 1.41  | 1513351  | 19.4   |
| 1+ | 839.3888  | 839.3883  | $C_3^*-CH_3O$                | 0.53  | 4886783  | 61.5   |
| 1+ | 853.4033  | 853.4040  | $B_3$                        | -0.84 | 427370   | 5.4    |
| 1+ | 855.3833  | 855.3832  | $C_3^*-CH_3$                 | 0.09  | 1441688  | 18.2   |
| 1+ | 869.3992  | 869.3989  | $C_3^\ddagger$               | 0.41  | 11444902 | 141.5  |
| 1+ | 871.4152  | 871.4145  | $C_3$                        | 0.72  | 6640976  | 82.1   |
| 1+ | 938.4785  | 938.4790  | $Y_{4\alpha}/Y_{4\beta}$     | -0.47 | 497461   | 6.0    |
| 1+ | 941.4572  | 941.4564  | $^{3,5}A_3^\ddagger$         | 0.90  | 1467469  | 17.8   |
| 1+ | 1070.5359 | 1070.5354 | $^{1,5}A_4$                  | 0.51  | 1057625  | 11.9   |
| 1+ | 1084.5157 | 1084.5146 | $C_4^*-CH_3O$                | 0.99  | 1282352  | 14.4   |
| 1+ | 1098.5310 | 1098.5303 | $B_4$                        | 0.62  | 3866560  | 43.4   |
| 1+ | 1114.5269 | 1114.5252 | $C_4^\ddagger$               | 1.50  | 533187   | 5.8    |
| 1+ | 1126.5853 | 1126.5838 | $Z_{4\alpha,4\beta}^*-CH_3O$ | 1.32  | 434171   | 4.7    |
| 1+ | 1142.5779 | 1142.5788 | $Z_{4\alpha,4\beta}^*-CH_3$  | -0.78 | 272466   | 3.0    |
| 1+ | 1156.5967 | 1156.5944 | $Z_{4\alpha,4\beta}$         | 2.01  | 372368   | 4.1    |

|    |           |           |                                 |      |         |      |
|----|-----------|-----------|---------------------------------|------|---------|------|
| 1+ | 1172.5907 | 1172.5893 | $Y_{4\alpha,4\beta}^{\ddagger}$ | 1.18 | 287570  | 3.0  |
| 1+ | 1202.6001 | 1202.5999 | $^{1,5}X_{4\alpha,4\beta}$      | 0.19 | 1633858 | 17.2 |
| 1+ | 1360.6977 | 1360.6942 | M-CH <sub>4</sub> O             | 2.62 | 331550  | 3.2  |
| 1+ | 1392.7219 | 1392.7204 | M                               | 1.09 | 2373368 | 23.2 |

**Table S12.** List of assigned EED fragments in Figure S1c. All fragments are sodium adducts unless labeled otherwise. Multiple assignments are separated by commas;  $\omega$  indicates harmonics; the double dagger symbol ( $\ddagger$ ) indicates that the fragment has two fewer hydrogens than the canonical structures; the double prime symbol ( $''$ ) indicates that the fragment has two more hydrogens than the canonical structure; the dot symbol ( $\cdot$ ) indicates a radical.

| $z$ | Exptl. $m/z$ | Theo. $m/z$ | Assignment                                    | $\Delta\text{ppm}$ | Intensity | S/N   |
|-----|--------------|-------------|-----------------------------------------------|--------------------|-----------|-------|
| 1+  | 211.0940     | 211.0941    | $B_{1\alpha,1\beta}\cdot\text{-CH}_3\text{O}$ | -0.45              | 462578    | 11.6  |
| 1+  | 227.0889     | 227.0890    | $C_{1\alpha,1\beta}\cdot\text{-CH}_3\text{O}$ | -0.33              | 2957972   | 71.9  |
| 1+  | 241.1046     | 241.1046    | $B_{1\alpha,1\beta}$                          | -0.31              | 413385    | 17.2  |
| 1+  | 257.0996     | 257.0996    | $C_{1\alpha,1\beta}\ddagger$                  | 0.08               | 1789985   | 43.5  |
| 1+  | 259.1152     | 259.1152    | $C_{1\alpha,1\beta}$                          | -0.15              | 738317    | 34.6  |
| 1+  | 269.1582     | 269.1582    | $Z_1\cdot\text{-CH}_3\text{O}$                | 0.02               | 2771893   | 66.2  |
| 1+  | 299.1685     | 299.1687    | $Z_1$                                         | -0.85              | 3300388   | 78.6  |
| 1+  | 301.1257     | 301.1258    | ${}^{0,4}A_{2\alpha}$                         | -0.28              | 365861    | 14.1  |
| 1+  | 315.1415     | 315.1414    | ${}^{1,3}A_{2\beta}, {}^{2,4}A_{2\beta}$      | 0.15               | 732154    | 17.2  |
| 1+  | 315.1637     | 315.1637    | $Y_1\ddagger$                                 | 0.07               | 865219    | 20.3  |
| 1+  | 317.1793     | 317.1793    | $Y_1$                                         | -0.09              | 5417656   | 125.9 |
| 1+  | 329.1570     | 329.1571    | ${}^{3,5}A_{2\alpha}$                         | -0.23              | 747570    | 33.4  |
| 1+  | 345.1743     | 345.1742    | ${}^{1,5}X_1$                                 | 0.08               | 3848254   | 88.1  |
| 1+  | 415.1939     | 415.1939    | ${}^{1,5}A_{2\alpha}\ddagger$                 | 0.02               | 1527131   | 33.8  |
| 1+  | 431.1888     | 431.1888    | $C_{2\alpha}\cdot\text{-CH}_3\text{O}$        | 0.03               | 1360776   | 29.9  |
| 1+  | 461.1993     | 461.1993    | $C_{2\alpha}\ddagger$                         | -0.05              | 2859089   | 61.5  |
| 1+  | 463.2150     | 463.2150    | $C_{2\alpha}$                                 | 0.04               | 1465637   | 31.3  |
| 1+  | 500.2688     | 500.2688    | $Z_2\cdot\text{-C}_2\text{H}_5\text{O}$       | 0.06               | 1006552   | 41.5  |
| 1+  | 502.2844     | 502.2845    | $Z_2\cdot\text{-Ac}$                          | -0.18              | 1086009   | 22.4  |
| 1+  | 505.2256     | 505.2255    | ${}^{0,4}A_3$                                 | 0.14               | 2693408   | 55.6  |
| 2+  | 510.7447     | 510.7447    | ${}^{1,5}X_{3\alpha}$                         | -0.01              | 1259043   | 25.7  |
| 1+  | 514.2846     | 514.2845    | $Z_2\cdot\text{-CH}_3\text{O}$                | 0.10               | 3845487   | 78.6  |
| 1+  | 527.2075     | 527.2075    | ${}^{0,4}A_3 + 2\text{Na} - \text{H}$         | -0.09              | 3902946   | 172.7 |
| 1+  | 530.2792     | 530.2794    | $Z_2\cdot\text{-CH}_3$                        | -0.43              | 661993    | 13.3  |
| 1+  | 533.2569     | 533.2568    | ${}^{3,5}A_3$                                 | 0.12               | 1793027   | 36.1  |
| 1+  | 544.2953     | 544.2951    | $Z_2$                                         | 0.34               | 2565246   | 50.9  |
| 1+  | 560.2907     | 560.2900    | $Y_2\ddagger$                                 | 1.23               | 331386    | 6.5   |
| 2+  | 560.7572     | 560.7598    | $B_4$                                         | -4.63              | 218597    | 4.3   |
| 1+  | 562.3044     | 562.3056    | $Y_2$                                         | -2.14              | 661877    | 13.0  |

|    |           |           |                                                     |       |          |        |
|----|-----------|-----------|-----------------------------------------------------|-------|----------|--------|
| 2+ | 569.7654  | 569.7650  | C <sub>4</sub>                                      | 0.64  | 413360   | 8.0    |
| 2+ | 589.7917  | 589.7918  | Z <sub>4α, 3β</sub>                                 | -0.19 | 2550903  | 48.9   |
| 1+ | 590.3006  | 590.3005  | <sup>1,5</sup> X <sub>2</sub>                       | 0.14  | 4447175  | 85.2   |
| 2+ | 612.7945  | 612.7945  | <sup>1,5</sup> X <sub>4α, 3β</sub>                  | -0.12 | 6412388  | 121.8  |
| 2+ | 626.8100  | 626.8102  | <sup>0,2</sup> X <sub>4α, 3β</sub>                  | -0.25 | 381142   | 7.2    |
| 2+ | 670.8370  | 670.8364  | <sup>0,4</sup> X <sub>4α, 3β</sub>                  | 0.82  | 2280636  | 41.7   |
| 2+ | 707.8550  | 707.8548  | M                                                   | 0.33  | 1.07E+08 | 1935.1 |
| 1+ | 734.3793  | 734.3792  | Y <sub>3α</sub> /Z <sub>3β</sub>                    | 0.12  | 730132   | 13.1   |
| 1+ | 823.3943  | 823.3934  | <sup>1,5</sup> A <sub>3</sub> <sup>‡</sup>          | 1.12  | 898105   | 15.7   |
| 1+ | 825.4091  | 825.4091  | <sup>1,5</sup> A <sub>3</sub>                       | 0.04  | 285087   | 5.0    |
| 1+ | 839.3886  | 839.3883  | C <sub>3</sub> <sup>*</sup> -CH <sub>3</sub> O      | 0.28  | 671892   | 11.6   |
| 1+ | 855.3835  | 855.3832  | C <sub>3</sub> <sup>*</sup> -CH <sub>3</sub>        | 0.34  | 679209   | 11.7   |
| 1+ | 869.3987  | 869.3989  | C <sub>3</sub> <sup>‡</sup>                         | -0.20 | 7751766  | 131.2  |
| 1+ | 871.4151  | 871.4145  | C <sub>3</sub>                                      | 0.60  | 2538225  | 43.0   |
| 1+ | 941.4563  | 941.4564  | <sup>3,5</sup> A <sub>4</sub>                       | -0.06 | 713158   | 11.8   |
| 1+ | 952.4949  | 952.4946  | Z <sub>3α</sub>                                     | 0.28  | 261662   | 4.2    |
| 1+ | 968.4894  | 968.4895  | Y <sub>3α</sub> <sup>‡</sup>                        | -0.13 | 249805   | 4.0    |
| 1+ | 998.5000  | 998.5001  | <sup>1,5</sup> X <sub>3α</sub>                      | -0.13 | 2368191  | 36.5   |
| 1+ | 1070.5370 | 1070.5354 | <sup>1,5</sup> A <sub>4</sub>                       | 1.53  | 371592   | 5.5    |
| 1+ | 1098.5299 | 1098.5303 | B <sub>4</sub>                                      | -0.34 | 2266598  | 33.8   |
| 1+ | 1114.5254 | 1114.5252 | C <sub>4</sub> <sup>‡</sup>                         | 0.14  | 686152   | 9.9    |
| 1+ | 1126.5847 | 1126.5838 | Z <sub>4α, 3β</sub> <sup>*</sup> -CH <sub>3</sub> O | 0.80  | 433261   | 6.3    |
| 1+ | 1172.5875 | 1172.5893 | Z <sub>4α, 4β</sub>                                 | -1.55 | 316011   | 5.7    |
| 1+ | 1202.6002 | 1202.5999 | <sup>1,5</sup> X <sub>4α, 3β</sub>                  | 0.24  | 856339   | 12.0   |
| 1+ | 1360.6947 | 1360.6942 | M-CH <sub>4</sub> O                                 | 0.38  | 202911   | 2.7    |
| 1+ | 1392.7202 | 1392.7204 | M                                                   | -0.13 | 1429924  | 18.7   |

**Table S13.** List of assigned EED fragments in Figure S2a. All fragments are sodium adducts unless labeled otherwise. Multiple assignments are separated by commas;  $\omega$  indicates harmonics; the double dagger symbol ( $\ddagger$ ) indicates that the fragment has two fewer hydrogens than the canonical structures; the double prime symbol ( $''$ ) indicates that the fragment has two more hydrogens than the canonical structure; the dot symbol ( $\cdot$ ) indicates a radical.

| $z$ | Exptl. $m/z$ | Theo. $m/z$ | Assignment                                                      | $\Delta$ ppm | Intensity | $S/N$ |
|-----|--------------|-------------|-----------------------------------------------------------------|--------------|-----------|-------|
| 1+  | 211.0934     | 211.0941    | $B_1\cdot$ -CH <sub>3</sub> O                                   | -3.34        | 2461427   | 47.7  |
| 1+  | 227.0883     | 227.0890    | $C_1\cdot$ -CH <sub>3</sub> O                                   | -2.93        | 4867073   | 89.7  |
| 1+  | 241.1046     | 241.1046    | $B_1$                                                           | -0.23        | 849379    | 15.7  |
| 1+  | 243.0834     | 243.0839    | $C_1\cdot$ -CH <sub>3</sub> , $C_{2\beta}\ddagger/Y_{4\beta}$   | -2.05        | 3928313   | 72.8  |
| 1+  | 259.1150     | 259.1152    | $C_1$                                                           | -1.00        | 1306114   | 24.1  |
| 1+  | 269.1581     | 269.1582    | $Z_1\cdot$ -CH <sub>3</sub> O                                   | -0.53        | 4822340   | 87.7  |
| 1+  | 285.1531     | 285.1531    | $Z_1\cdot$ -CH <sub>3</sub>                                     | -0.12        | 2814129   | 50.1  |
| 1+  | 299.1687     | 299.1687    | $Z_1$                                                           | -0.15        | 4879694   | 84.0  |
| 1+  | 301.1259     | 301.1258    | $^{0,4}A_{2\alpha}$                                             | 0.29         | 2944244   | 50.3  |
| 1+  | 315.1416     | 315.1414    | $^{1,3}A_{2\alpha, 2\beta}, ^{2,4}A_{2\alpha, 2\beta}$          | 0.68         | 1993545   | 34.1  |
| 1+  | 315.1639     | 315.1637    | $Y_1\ddagger$                                                   | 0.61         | 2535854   | 43.4  |
| 1+  | 317.1795     | 317.1793    | $Y_1$                                                           | 0.60         | 13833557  | 236.6 |
| 1+  | 323.108      | 323.1078    | $^{0,4}A_{2\alpha} + 2Na - H$                                   | 0.63         | 3227342   | 74.5  |
| 1+  | 329.1572     | 329.1571    | $^{3,5}A_{2\alpha}$                                             | 0.50         | 2515376   | 43.6  |
| 1+  | 345.1744     | 345.1742    | $^{1,5}X_1$                                                     | 0.60         | 7456714   | 129.8 |
| 1+  | 371.1682     | 371.1676    | $B_{2\beta}/^{0,4}X_{4\beta}$                                   | 1.62         | 1649345   | 28.4  |
| 1+  | 385.1839     | 385.1833    | $B_{2\beta}\cdot$ -C <sub>2</sub> H <sub>5</sub> O <sub>2</sub> | 1.43         | 3395620   | 57.9  |
| 1+  | 401.1788     | 401.1781    | $C_{2\beta}\cdot$ -C <sub>2</sub> H <sub>5</sub> O <sub>2</sub> | 1.81         | 1587441   | 26.5  |
| 1+  | 414.2328     | 414.2321    | $^{0,2}X_1$                                                     | 1.85         | 635546    | 10.2  |
| 1+  | 415.1943     | 415.1939    | $^{1,5}A_{2\beta}\ddagger$                                      | 1.00         | 2030646   | 32.6  |
| 1+  | 417.2101     | 417.2095    | $^{1,5}A_{2\beta}$                                              | 1.33         | 830681    | 13.3  |
| 1+  | 431.1896     | 431.1888    | $C_{2\alpha}/Z_{4\alpha}''$                                     | 2.00         | 11120905  | 175.5 |
| 1+  | 445.2052     | 445.2044    | $B_{2\beta}$                                                    | 1.82         | 3583703   | 54.8  |
| 1+  | 447.1844     | 447.1837    | $C_{2\beta}\cdot$ -CH <sub>3</sub>                              | 1.51         | 2006639   | 30.7  |
| 1+  | 453.1718     | 453.1708    | $C_{2\alpha}/Z_{4\alpha}'' + 2Na - H$                           | 2.23         | 1667266   | 32.4  |
| 1+  | 461.2003     | 461.1993    | $C_{2\beta}\ddagger$                                            | 2.03         | 12128542  | 185.9 |
| 1+  | 463.2159     | 463.2150    | $C_{2\beta}$                                                    | 1.91         | 1957535   | 30.1  |
| 1+  | 475.1797     | 475.1786    | $C_{2\alpha}\ddagger/^{1,5}X_{4\alpha}''$                       | 2.34         | 1167474   | 18.0  |
| 1+  | 484.2751     | 484.2740    | $Z_2\cdot$ -C <sub>2</sub> H <sub>5</sub> O <sub>2</sub>        | 2.34         | 1088225   | 16.8  |
| 1+  | 491.2110     | 491.2099    | $Y_{4\alpha'}/^{0,4}A_{4\alpha}''$                              | 2.14         | 848797    | 13.2  |

|    |           |           |                                      |       |          |         |
|----|-----------|-----------|--------------------------------------|-------|----------|---------|
| 1+ | 500.2699  | 500.2688  | $Z_2^* - C_2H_5O$                    | 2.32  | 2041165  | 31.6    |
| 1+ | 502.2856  | 502.2845  | $Z_2^* - Ac$                         | 2.17  | 3282636  | 50.7    |
| 1+ | 514.2858  | 514.2845  | $Z_2^* - CH_3O$                      | 2.44  | 10482719 | 161.3   |
| 1+ | 519.2422  | 519.2412  | $^{1,3}A_{3\beta}, ^{2,4}A_{3\beta}$ | 1.83  | 1501063  | 23.1    |
| 1+ | 530.2809  | 530.2794  | $Z_2^* - CH_3$                       | 2.67  | 2039061  | 31.3    |
| 1+ | 544.2967  | 544.2951  | $Z_2$                                | 2.93  | 5725663  | 87.2    |
| 1+ | 560.2889  | 560.2900  | $Y_2^\ddagger$                       | -1.88 | 758609   | 11.5    |
| 1+ | 562.3068  | 562.3056  | $Y_2$                                | 2.11  | 2824116  | 42.6    |
| 1+ | 575.2688  | 575.2674  | $^{2,5}A_{2\alpha}^\ddagger$         | 2.36  | 988828   | 14.8    |
| 1+ | 590.3020  | 590.3005  | $^{1,5}X_2$                          | 2.41  | 18637936 | 274.9   |
| 1+ | 605.2792  | 605.2779  | $C_{2\alpha}^* - C_2H_5O_2$          | 2.14  | 721711   | 10.6    |
| 2+ | 612.7957  | 612.7945  | $^{1,5}X_{3\alpha}$                  | 1.95  | 920701   | 13.3    |
| 1+ | 619.2960  | 619.2936  | $^{1,5}A_{2\alpha}^\ddagger$         | 3.78  | 2981754  | 43.1    |
| 1+ | 621.2749  | 621.2730  | $C_{2\alpha}^* - C_2H_5O$            | 3.10  | 502265   | 7.3     |
| 1+ | 621.3113  | 621.3093  | $^{1,5}A_{2\alpha}$                  | 3.30  | 1783490  | 25.8    |
| 1+ | 635.2916  | 635.2885  | $C_{2\alpha}^* - CH_3O$              | 4.78  | 1542163  | 21.8    |
| 2+ | 651.3038  | 651.3016  | $C_3$                                | 3.33  | 872728   | 11.9    |
| 1+ | 665.3010  | 665.2991  | $C_{2\alpha}^\ddagger$               | 2.86  | 4787549  | 63.2    |
| 1+ | 667.3166  | 667.3148  | $C_{2\alpha}$                        | 2.75  | 2648819  | 35.0    |
| 1+ | 709.3272  | 709.3253  | $^{0,4}A_3$                          | 2.59  | 4855292  | 61.7    |
| 2+ | 714.8457  | 714.8444  | $^{1,5}X_{3\beta}$                   | 1.83  | 1355086  | 16.5    |
| 1+ | 731.3098  | 731.3073  | $^{0,4}A_3 + 2Na - H$                | 3.36  | 1312671  | 20.0    |
| 1+ | 734.3808  | 734.3792  | $Y_{3\alpha}/Z_{3\beta}$             | 2.22  | 3178970  | 38.6    |
| 1+ | 737.3585  | 737.3566  | $^{3,5}A_3$                          | 2.59  | 6861491  | 83.3    |
| 2+ | 750.8600  | 750.8621  | $^{1,5}A_4$                          | -2.80 | 441908   | 5.0     |
| 2+ | 764.8584  | 764.8595  | $B_4$                                | -1.50 | 543629   | 6.1     |
| 2+ | 793.8941  | 793.8916  | $Z_{4\alpha, 4\beta}$                | 3.13  | 3396053  | 36.3    |
| 2+ | 816.8966  | 816.8943  | $^{1,5}X_{4\alpha, 4\beta}$          | 2.77  | 11178151 | 115.7   |
| 2+ | 830.9141  | 830.9100  | $^{0,2}X_{4\alpha, 4\beta}$          | 4.94  | 758834   | 7.9     |
| 2+ | 838.8936  | 838.8963  | $^{0,2}A_5$                          | -3.25 | 5412996  | 54.4    |
| 1+ | 839.3899  | 839.3883  | $C_3/Z_{3\beta}$                     | 1.92  | 4894115  | 49.2    |
| 2+ | 874.9382  | 874.9362  | $^{0,4}X_{4\alpha, 4\beta}$          | 2.34  | 3570014  | 36.0    |
| 2+ | 911.9559  | 911.9546  | $M$                                  | 1.47  | 3.74E+09 | 38683.4 |
| 1+ | 1043.4895 | 1043.4881 | $C_3^\ddagger - CH_3O$               | 1.37  | 1158935  | 12.2    |

|    |           |           |                               |       |         |      |
|----|-----------|-----------|-------------------------------|-------|---------|------|
| 1+ | 1059.4848 | 1059.4830 | $C_3^{\bullet}-CH_3$          | 1.65  | 464292  | 4.9  |
| 1+ | 1084.5160 | 1084.5146 | $C_3$                         | 1.26  | 549503  | 5.8  |
| 1+ | 1126.5809 | 1126.5838 | $Z_{3\alpha}^{\bullet}-CH_3O$ | -2.58 | 756735  | 7.8  |
| 1+ | 1156.5958 | 1156.5944 | $Z_{3\alpha}$                 | 1.20  | 709671  | 7.3  |
| 1+ | 1172.5903 | 1172.5893 | $Y_{3\alpha}^{\ddagger}$      | 0.89  | 976543  | 10.0 |
| 1+ | 1202.5996 | 1202.5999 | $^{1,5}X_{3\alpha}$           | -0.22 | 3254020 | 32.7 |
| 1+ | 1231.5950 | 1231.5929 | $^{1,5}A_3^{\ddagger}$        | 1.66  | 665755  | 6.7  |
| 1+ | 1233.6087 | 1233.6086 | $^{1,5}A_3$                   | 0.11  | 2374781 | 23.8 |
| 1+ | 1277.5988 | 1277.5984 | $C_3^{\ddagger}$              | 0.32  | 9293675 | 90.9 |
| 1+ | 1330.6840 | 1330.6836 | $Z_{3\beta}^{\bullet}-CH_3O$  | 0.32  | 1612447 | 15.8 |
| 1+ | 1349.6573 | 1349.6559 | $^{3,5}A_4$                   | 0.99  | 555852  | 5.4  |
| 1+ | 1360.6933 | 1360.6942 | $Z_{3\beta}$                  | -0.65 | 1583308 | 15.0 |
| 1+ | 1376.6905 | 1376.6891 | $Y_{3\beta}^{\ddagger}$       | 1.05  | 630114  | 6.0  |
| 1+ | 1378.7050 | 1378.7047 | $Y_{3\beta}$                  | 0.21  | 1530119 | 14.5 |
| 1+ | 1406.6984 | 1406.6996 | $^{1,5}X_{3\beta}$            | -0.86 | 2111782 | 20.1 |
| 1+ | 1506.7293 | 1506.7298 | $B_4$                         | -0.36 | 2147603 | 19.7 |
| 1+ | 1564.7948 | 1564.7939 | $Z_{4\alpha, 4\beta}$         | 0.56  | 616009  | 12.7 |
| 1+ | 1582.7981 | 1582.8045 | $Y_{4\alpha, 4\beta}$         | -4.04 | 415549  | 3.7  |
| 1+ | 1610.7955 | 1610.7994 | $^{1,5}X_{4\alpha, 4\beta}$   | -2.44 | 1558936 | 13.8 |
| 1+ | 1768.8937 | 1768.8937 | $M-CH_4O$                     | -0.01 | 649836  | 5.5  |
| 1+ | 1800.9140 | 1800.9199 | $M$                           | -3.29 | 5382990 | 45.2 |



**Table S14.** List of assigned EED fragments in Figure S2b. All fragments are sodium adducts unless labeled otherwise. Multiple assignments are separated by commas;  $\omega$  indicates harmonics; the double dagger symbol ( $\ddagger$ ) indicates that the fragment has two fewer hydrogens than the canonical structures; the double prime symbol ( $''$ ) indicates that the fragment has two more hydrogens than the canonical structure; the dot symbol ( $\cdot$ ) indicates a radical.

| <i>z</i> | Exptl. <i>m/z</i> | Theo. <i>m/z</i> | Assignment                                                                   | $\Delta$ ppm | Intensity | <i>S/N</i> |
|----------|-------------------|------------------|------------------------------------------------------------------------------|--------------|-----------|------------|
| 1+       | 227.0890          | 227.0888         | $C_1\cdot$ -CH <sub>3</sub> O                                                | 1.01         | 1394461   | 29.8       |
| 1+       | 241.1046          | 241.1046         | B <sub>1</sub>                                                               | -0.31        | 436877    | 10.5       |
| 1+       | 243.0839          | 243.0839         | $C_1\cdot$ -CH <sub>3</sub> , $C_{2\alpha}\ddagger/Y_{5\alpha}$              | 0.04         | 947744    | 26.0       |
| 1+       | 257.0996          | 257.0997         | $C_1\ddagger$                                                                | -0.08        | 508863    | 10.7       |
| 1+       | 259.1151          | 259.1152         | C <sub>1</sub>                                                               | -0.54        | 469992    | 11.5       |
| 1+       | 299.1688          | 299.1687         | Z <sub>1</sub>                                                               | 0.30         | 882859    | 18.0       |
| 1+       | 317.1793          | 317.1792         | Y <sub>1</sub>                                                               | 0.32         | 3511068   | 72.0       |
| 1+       | 345.1742          | 345.1742         | <sup>1,5</sup> X <sub>1</sub>                                                | 0.00         | 1371685   | 27.5       |
| 1+       | 415.1938          | 415.1939         | <sup>1,5</sup> A <sub>2<math>\alpha</math>'<math>\ddagger</math></sub>       | -0.13        | 484312    | 10.6       |
| 1+       | 431.1887          | 431.1887         | $C_{2\alpha}\cdot$ -CH <sub>3</sub> O                                        | 0.00         | 1728668   | 33.1       |
| 1+       | 445.2045          | 445.2045         | B <sub>2<math>\alpha</math>'</sub>                                           | -0.11        | 646959    | 12.4       |
| 1+       | 447.1852          | 447.1859         | $C_{2\alpha}\cdot$ -CH <sub>3</sub>                                          | -1.41        | 274171    | 5.2        |
| 1+       | 461.1992          | 461.2008         | $C_{2\alpha}\ddagger$                                                        | -3.43        | 1073998   | 20.5       |
| 1+       | 463.2156          | 463.2164         | C <sub>2<math>\alpha</math>'</sub>                                           | -1.75        | 335841    | 6.4        |
| 1+       | 502.2846          | 502.2843         | Z <sub>2</sub> $\cdot$ -Ac                                                   | 0.66         | 538081    | 9.9        |
| 1+       | 505.2254          | 505.2255         | <sup>0,4</sup> A <sub>3<math>\alpha</math>'</sub>                            | -0.20        | 647503    | 11.9       |
| 1+       | 514.2847          | 514.2846         | Z <sub>2</sub> $\cdot$ -CH <sub>3</sub> O                                    | 0.16         | 1683460   | 30.6       |
| 1+       | 530.2795          | 530.2797         | Z <sub>2</sub> $\cdot$ -CH <sub>3</sub>                                      | -0.34        | 312570    | 5.6        |
| 1+       | 533.2570          | 533.2571         | <sup>3,5</sup> A <sub>3<math>\alpha</math>'</sub>                            | -0.15        | 309353    | 5.5        |
| 1+       | 544.2951          | 544.2949         | Z <sub>2</sub>                                                               | 0.26         | 855435    | 15.2       |
| 2+       | 562.3058          | 562.3056         | Y <sub>2</sub>                                                               | 0.32         | 322999    | 5.7        |
| 1+       | 590.3007          | 590.3005         | <sup>1,5</sup> X <sub>2</sub>                                                | 0.34         | 2072446   | 35.4       |
| 1+       | 635.2888          | 635.2885         | C <sub>3<math>\alpha</math>'</sub> /Z <sub>4<math>\alpha</math>''</sub>      | 0.44         | 1097338   | 24.3       |
| 2+       | 651.3027          | 651.3022         | C <sub>4</sub>                                                               | 0.68         | 168173    | 2.8        |
| 2+       | 793.8922          | 793.8920         | Z <sub>5<math>\alpha</math>'</sub> , 4 $\alpha$ '', 3 $\beta$                | 0.26         | 532943    | 8.2        |
| 2+       | 816.8943          | 816.8939         | <sup>1,5</sup> X <sub>5<math>\alpha</math>'</sub> , 4 $\alpha$ '', 3 $\beta$ | 0.53         | 1018092   | 15.3       |
| 1+       | 839.3887          | 839.3883         | C <sub>4</sub> /Z <sub>3<math>\alpha</math>'</sub>                           | 0.50         | 1178967   | 17.3       |
| 1+       | 874.9365          | 874.9362         | <sup>0,4</sup> X <sub>4<math>\alpha</math>'</sub> , 4 $\alpha$ '', 3 $\beta$ | 0.39         | 372991    | 5.3        |
| 2+       | 911.9552          | 911.9547         | M                                                                            | 0.58         | 23592078  | 329.5      |

|    |           |           |                       |       |         |      |
|----|-----------|-----------|-----------------------|-------|---------|------|
| 1+ | 913.4255  | 913.4251  | $^{0,4}A_4$           | 0.42  | 867365  | 12.1 |
| 1+ | 935.4060  | 935.4071  | $^{0,4}A_4 + 2Na - H$ | -1.19 | 986016  | 20.8 |
| 1+ | 941.4547  | 941.4552  | $^{3,5}A_4$           | -0.56 | 237377  | 2.6  |
| 1+ | 998.5005  | 998.4996  | $^{1,5}X_{3\alpha}$   | 0.98  | 520514  | 5.5  |
| 1+ | 1043.4887 | 1043.4873 | $C_4/Z_{3\beta}$      | 1.38  | 596691  | 6.2  |
| 1+ | 1277.6003 | 1277.5975 | $C_4^\ddagger$        | 2.22  | 1033891 | 9.4  |
| 1+ | 1360.6946 | 1360.6898 | $Z_{4\alpha'}$        | 3.53  | 572988  | 5.1  |
| 1+ | 1406.7003 | 1406.6998 | $^{1,5}X_{4\alpha'}$  | 0.38  | 380576  | 3.4  |
| 1+ | 1506.7391 | 1506.7343 | $B_5$                 | 3.19  | 245325  | 2.1  |
| 1+ | 1800.9223 | 1800.9178 | $M$                   | 2.50  | 435781  | 4.3  |

**Table S15.** List of assigned EED fragments in Figure S2c. All fragments are sodium adducts unless labeled otherwise. Multiple assignments are separated by commas;  $\omega$  indicates harmonics; the double dagger symbol ( $\ddagger$ ) indicates that the fragment has two fewer hydrogens than the canonical structures; the double prime symbol ( $''$ ) indicates that the fragment has two more hydrogens than the canonical structure; the dot symbol ( $\cdot$ ) indicates a radical.

| $z$ | Exptl. $m/z$ | Theo. $m/z$ | Assignment                                          | $\Delta$ ppm | Intensity | S/N   |
|-----|--------------|-------------|-----------------------------------------------------|--------------|-----------|-------|
| 1+  | 227.0890     | 227.0890    | $C_1\cdot-CH_3O$                                    | 0.20         | 1212647   | 43.8  |
| 1+  | 241.1046     | 241.1046    | $B_1$                                               | -0.23        | 300695    | 14.8  |
| 1+  | 243.0840     | 243.0839    | $C_1\cdot-CH_3, C_{2\alpha'}\ddagger/Y_{5\alpha}$   | 0.21         | 1107137   | 40.2  |
| 1+  | 257.0996     | 257.0996    | $C_1\ddagger$                                       | 0.20         | 500007    | 17.8  |
| 1+  | 269.1582     | 269.1582    | $Z_1\cdot-CH_3O$                                    | 0.10         | 1133127   | 39.3  |
| 1+  | 299.1688     | 299.1687    | $Z_1$                                               | 0.20         | 920668    | 58.9  |
| 1+  | 301.1253     | 301.1258    | $^{0,4}A_{2\alpha}$                                 | -1.57        | 582721    | 14.1  |
| 1+  | 317.1793     | 317.1793    | $Y_1$                                               | 0.07         | 3269107   | 114.5 |
| 1+  | 345.1742     | 345.1742    | $^{1,5}X_1$                                         | 0.05         | 1272727   | 43.4  |
| 1+  | 415.1936     | 415.1939    | $^{1,5}A_{2\alpha'}\ddagger$                        | -0.71        | 366219    | 17.3  |
| 1+  | 417.1729     | 417.1732    | $C_{2\alpha'}\cdot-C_2H_5O$                         | -0.58        | 181771    | 5.9   |
| 1+  | 431.1887     | 431.1888    | $C_{2\alpha'}\cdot-CH_3O, C_{3\alpha}/Z_{4\alpha'}$ | -0.23        | 1839747   | 59.5  |
| 1+  | 445.2044     | 445.2044    | $B_{2\alpha'}$                                      | -0.11        | 586204    | 18.6  |
| 1+  | 461.1993     | 461.1993    | $C_{2\alpha'}\ddagger$                              | -0.12        | 2067356   | 64.9  |
| 1+  | 502.2844     | 502.2845    | $Z_2\cdot-Ac$                                       | -0.36        | 622586    | 19.0  |
| 1+  | 514.2844     | 514.2845    | $Z_2\cdot-CH_3O$                                    | -0.19        | 1562169   | 47.4  |
| 1+  | 519.2408     | 519.2412    | $^{1,3}A_{3\alpha'}, ^{2,4}A_{3\alpha'}$            | -0.75        | 338951    | 10.3  |
| 1+  | 530.2794     | 530.2794    | $Z_2\cdot-CH_3$                                     | -0.18        | 265475    | 8.0   |
| 1+  | 544.2950     | 544.2951    | $Z_2$                                               | -0.05        | 1043738   | 31.2  |
| 1+  | 562.3055     | 562.3056    | $Y_2$                                               | -0.27        | 378934    | 16.3  |
| 1+  | 590.3005     | 590.3005    | $^{1,5}X_2$                                         | -0.09        | 2045757   | 59.9  |
| 2+  | 714.8445     | 714.8444    | $^{1,5}X_{4\alpha'}$                                | 0.03         | 300059    | 8.1   |
| 2+  | 773.8646     | 773.8648    | $C_5$                                               | -0.29        | 188147    | 4.8   |
| 2+  | 793.8913     | 793.8916    | $Z_{5\alpha'}, 4\alpha'', 3\beta$                   | -0.40        | 527417    | 13.6  |
| 2+  | 816.8943     | 816.8943    | $^{1,5}X_{5\alpha'}, 4\alpha'', 3\beta$             | -0.08        | 1887249   | 47.6  |
| 2+  | 830.9107     | 830.9100    | $^{0,2}X_{5\alpha'}, 4\alpha'', 3\beta$             | 0.92         | 92528     | 2.3   |
| 1+  | 839.3883     | 839.3883    | $C_{3\alpha}\cdot-CH_3O$                            | 0.02         | 121167    | 3.0   |
| 1+  | 869.3985     | 869.3989    | $C_{3\alpha}\ddagger$                               | -0.39        | 356202    | 8.8   |
| 2+  | 874.9359     | 874.9362    | $^{0,4}X_{5\alpha'}, 4\alpha'', 3\beta$             | -0.31        | 430943    | 10.4  |
| 2+  | 911.9547     | 911.9546    | M                                                   | 0.12         | 32684054  | 771.0 |

|    |           |           |                         |       |         |      |
|----|-----------|-----------|-------------------------|-------|---------|------|
| 1+ | 913.4266  | 913.4251  | $^{0,4}A_4$             | 1.67  | 1086778 | 25.6 |
| 1+ | 1335.6406 | 1335.6403 | $^{2,4}A_5$             | 0.24  | 110576  | 2.1  |
| 1+ | 941.4515  | 941.4552  | $^{3,5}A_4$             | -4.02 | 335376  | 7.9  |
| 1+ | 998.5003  | 998.4996  | $^{1,5}\chi_{3\alpha}$  | 0.69  | 902261  | 20.8 |
| 1+ | 1043.4883 | 1043.4873 | $C_4/Z_{3\beta}$        | 0.95  | 1053154 | 23.5 |
| 1+ | 1277.5989 | 1277.5975 | $C_4^\ddagger$          | 1.11  | 1398678 | 26.9 |
| 1+ | 1360.6898 | 1360.6933 | $Z_{4\alpha'}$          | -2.58 | 195995  | 3.6  |
| 1+ | 1406.6998 | 1406.6986 | $^{1,5}\chi_{4\alpha'}$ | 0.87  | 284986  | 5.3  |
| 1+ | 1506.7343 | 1506.7312 | $B_5$                   | 2.04  | 266175  | 4.7  |
| 1+ | 1800.9215 | 1800.9178 | M                       | 2.05  | 657706  | 10.5 |

**Table S16.** List of assigned EED fragments in Figure S3a. All fragments are sodium adducts unless labeled otherwise. Multiple assignments are separated by commas;  $\omega$  indicates harmonics; the double dagger symbol ( $\ddagger$ ) indicates that the fragment has two fewer hydrogens than the canonical structures; the double prime symbol ( $''$ ) indicates that the fragment has two more hydrogens than the canonical structure; the dot symbol ( $\cdot$ ) indicates a radical.

| <b>z</b> | <b>Exptl. m/z</b> | <b>Theo. m/z</b> | <b>Assignment</b>                                                                                                                        | <b><math>\Delta</math>ppm</b> | <b>Intensity</b> | <b>S/N</b> |
|----------|-------------------|------------------|------------------------------------------------------------------------------------------------------------------------------------------|-------------------------------|------------------|------------|
| 1+       | 227.0884          | 227.0890         | $C_1\cdot$ -CH <sub>3</sub> O                                                                                                            | -2.49                         | 1824395          | 63.9       |
| 1+       | 241.1040          | 241.1046         | B <sub>1</sub>                                                                                                                           | -2.84                         | 579721           | 17.9       |
| 1+       | 243.0839          | 243.0839         | $C_1\cdot$ -CH <sub>3</sub> , C <sub>2<math>\beta</math></sub> , 2 $\alpha'$ <sup>‡</sup> /Y <sub>5<math>\beta</math></sub> , 5 $\alpha$ | -0.24                         | 2315792          | 40.4       |
| 1+       | 257.0989          | 257.0996         | C <sub>1</sub> <sup>‡</sup>                                                                                                              | -2.72                         | 944566           | 31.4       |
| 1+       | 259.1156          | 259.1152         | C <sub>1</sub>                                                                                                                           | 1.35                          | 278065           | 4.7        |
| 1+       | 269.1582          | 269.1582         | Z <sub>1</sub> <sup>·</sup> -CH <sub>3</sub> O                                                                                           | -0.09                         | 1034626          | 17.5       |
| 1+       | 299.1687          | 299.1687         | Z <sub>1</sub>                                                                                                                           | -0.15                         | 1434823          | 51.4       |
| 1+       | 317.1793          | 317.1793         | Y <sub>1</sub>                                                                                                                           | -0.03                         | 4349914          | 68.5       |
| 1+       | 345.1742          | 345.1742         | <sup>1,5</sup> X <sub>1</sub>                                                                                                            | 0.05                          | 4158642          | 70.0       |
| 1+       | 417.2088          | 417.2095         | <sup>1,5</sup> A <sub>2<math>\alpha'</math></sub> , 2 $\alpha''$ , 2 $\beta$                                                             | -1.78                         | 402701           | 6.3        |
| 1+       | 431.1886          | 431.1888         | C <sub>2<math>\alpha'</math></sub> , 2 $\alpha''$ , 2 $\beta$ <sup>‡*</sup> -CH <sub>3</sub> O                                           | -0.37                         | 2773351          | 43.2       |
| 1+       | 445.2045          | 445.2044         | B <sub>2<math>\alpha'</math></sub> , 2 $\alpha''$ , 2 $\beta$                                                                            | 0.18                          | 2026681          | 31.4       |
| 1+       | 461.1997          | 461.1993         | C <sub>2<math>\alpha'</math></sub> , 2 $\alpha''$ , 2 $\beta$ <sup>‡</sup>                                                               | 0.71                          | 4278156          | 66.4       |
| 1+       | 463.2150          | 463.2150         | C <sub>2<math>\alpha'</math></sub> , 2 $\alpha''$ , 2 $\beta$                                                                            | 0.08                          | 1348793          | 20.9       |
| 1+       | 505.2256          | 505.2256         | <sup>0,4</sup> A <sub>3<math>\alpha'</math></sub>                                                                                        | 0.05                          | 875778           | 13.4       |
| 1+       | 514.2845          | 514.2845         | Z <sub>2</sub> <sup>·</sup> -CH <sub>3</sub> O                                                                                           | 0.01                          | 2638883          | 40.0       |
| 1+       | 527.2075          | 527.2076         | <sup>0,4</sup> A <sub>3<math>\alpha'</math></sub> + 2Na - H                                                                              | -0.12                         | 1259692          | 36.4       |
| 1+       | 530.2800          | 530.2794         | Z <sub>2</sub> <sup>·</sup> -CH <sub>3</sub>                                                                                             | 0.95                          | 352120           | 5.3        |
| 1+       | 533.2570          | 533.2568         | <sup>3,5</sup> A <sub>3<math>\alpha'</math></sub>                                                                                        | 0.25                          | 995079           | 14.9       |
| 1+       | 544.2955          | 544.2951         | Z <sub>2</sub>                                                                                                                           | 0.87                          | 1071132          | 15.8       |
| 1+       | 560.2894          | 560.2900         | Y <sub>2</sub> <sup>‡</sup>                                                                                                              | -1.06                         | 259307           | 3.8        |
| 1+       | 562.3056          | 562.3056         | Y <sub>2</sub>                                                                                                                           | 0.02                          | 530167           | 7.7        |
| 1+       | 590.3005          | 590.3005         | <sup>1,5</sup> X <sub>2</sub>                                                                                                            | -0.06                         | 3425827          | 48.7       |
| 1+       | 635.2884          | 635.2885         | C <sub>3<math>\alpha</math></sub> /Z <sub>4<math>\alpha'</math></sub>                                                                    | -0.24                         | 1536134          | 21.5       |
| 1+       | 734.3797          | 734.3792         | Y <sub>3<math>\alpha</math></sub> /Z <sub>3<math>\beta</math></sub>                                                                      | 0.68                          | 531711           | 7.0        |
| 2+       | 854.3881          | 854.3936         | C <sub>4</sub> <sup>‡</sup>                                                                                                              | -6.45                         | 621671           | 13.0       |
| 2+       | 895.9404          | 895.9415         | Z <sub>4<math>\alpha'</math></sub> , 3 $\beta$                                                                                           | -1.23                         | 485813           | 5.7        |
| 2+       | 918.9443          | 918.9442         | <sup>1,5</sup> X <sub>4<math>\alpha'</math></sub> , 4 $\alpha''$ , 3 $\beta$                                                             | 0.12                          | 807427           | 9.2        |
| 2+       | 977.9622          | 977.9646         | B <sub>5</sub>                                                                                                                           | -2.47                         | 314352           | 3.5        |
| 2+       | 1020.9938         | 1020.9941        | <sup>1,5</sup> X <sub>5<math>\alpha''</math></sub> , 5 $\alpha'$ , 4 $\beta$                                                             | -0.33                         | 977781           | 10.4       |

|    |           |           |                                                      |       |          |       |
|----|-----------|-----------|------------------------------------------------------|-------|----------|-------|
| 2+ | 1116.0542 | 1116.0543 | M                                                    | -0.09 | 30855028 | 320.3 |
| 1+ | 1139.5074 | 1139.5069 | $^{0,4}A_4 + 2Na - H$                                | 0.44  | 856792   | 16.3  |
| 1+ | 1145.5543 | 1145.5562 | $^{3,5}A_4$                                          | -1.60 | 370453   | 3.7   |
| 1+ | 1202.5993 | 1202.5999 | $^{1,5}X_{3\alpha}$                                  | -0.51 | 1041855  | 10.2  |
| 1+ | 1247.5881 | 1247.5879 | $C_4/Z_{3\beta}$                                     | 0.21  | 1027858  | 10.1  |
| 1+ | 1685.7939 | 1685.7980 | $C_4^\ddagger$                                       | -2.43 | 440655   | 3.7   |
| 1+ | 1738.8783 | 1738.8832 | $Z_{4\alpha' , 4\alpha' , 3\beta}^{\bullet} - CH_3O$ | -2.82 | 392021   | 3.1   |
| 1+ | 1814.8982 | 1814.8992 | $^{1,5}X_{4\alpha' , 4\alpha' , 3\beta}$             | -0.55 | 319226   | 2.5   |
| 1+ | 2209.1180 | 2209.1195 | M                                                    | -0.69 | 538742   | 3.9   |

**Table S17.** List of assigned EED fragments in Figure S3b. All fragments are sodium adducts unless labeled otherwise. Multiple assignments are separated by commas;  $\omega$  indicates harmonics; the double dagger symbol ( $\ddagger$ ) indicates that the fragment has two fewer hydrogens than the canonical structures; the double prime symbol ( $''$ ) indicates that the fragment has two more hydrogens than the canonical structure; the dot symbol ( $\cdot$ ) indicates a radical.

| $z$ | Exptl. $m/z$ | Theo. $m/z$ | Assignment                                                                                                                                                  | $\Delta$ ppm | Intensity | $S/N$ |
|-----|--------------|-------------|-------------------------------------------------------------------------------------------------------------------------------------------------------------|--------------|-----------|-------|
| 1+  | 227.0889     | 227.0890    | $C_1\cdot$ -CH <sub>3</sub> O                                                                                                                               | -0.24        | 3615028   | 80.0  |
| 1+  | 241.1041     | 241.1046    | B <sub>1</sub>                                                                                                                                              | -2.38        | 365187    | 11.8  |
| 1+  | 243.0839     | 243.0839    | $C_1\cdot$ -CH <sub>3</sub> , C <sub>2<math>\beta</math>, 2<math>\alpha'</math></sub> <sup>‡</sup> /Y <sub>4<math>\beta</math>, 5<math>\alpha'</math></sub> | -0.20        | 3541806   | 76.5  |
| 1+  | 259.1149     | 259.1152    | C <sub>1</sub>                                                                                                                                              | -1.35        | 431193    | 8.1   |
| 1+  | 269.1582     | 269.1582    | Z <sub>1</sub> <sup>*</sup> -CH <sub>3</sub> O                                                                                                              | -0.16        | 1124361   | 24.0  |
| 1+  | 285.1524     | 285.1531    | Z <sub>1</sub> <sup>*</sup> -CH <sub>3</sub>                                                                                                                | -2.71        | 385817    | 8.2   |
| 1+  | 299.1687     | 299.1687    | Z <sub>1</sub>                                                                                                                                              | -0.15        | 895894    | 19.0  |
| 1+  | 301.1251     | 301.1258    | <sup>0,4</sup> A <sub>2<math>\alpha''</math></sub>                                                                                                          | -2.34        | 674662    | 24.8  |
| 1+  | 315.1413     | 315.1414    | <sup>1,3</sup> A <sub>2<math>\alpha'</math>, 2<math>\beta</math></sub> or <sup>2,4</sup> A <sub>2<math>\alpha'</math>, 2<math>\beta</math></sub>            | -0.50        | 460577    | 9.6   |
| 1+  | 329.1562     | 329.1571    | <sup>3,5</sup> A <sub>2<math>\alpha''</math></sub>                                                                                                          | -2.60        | 615096    | 21.9  |
| 1+  | 317.1792     | 317.1793    | Y <sub>1</sub>                                                                                                                                              | -0.28        | 3712570   | 77.1  |
| 1+  | 343.1357     | 343.1363    | <sup>0,3</sup> A <sub>2<math>\alpha'</math>, 2<math>\beta</math></sub> <sup>‡</sup>                                                                         | -1.83        | 165648    | 3.4   |
| 1+  | 345.1741     | 345.1742    | <sup>1,5</sup> X <sub>1</sub>                                                                                                                               | -0.39        | 1325820   | 27.0  |
| 1+  | 385.1831     | 385.1833    | B <sub>2<math>\alpha'</math>, 2<math>\beta</math></sub> <sup>*</sup> -C <sub>2</sub> H <sub>5</sub> O <sub>2</sub>                                          | -0.59        | 876569    | 17.8  |
| 1+  | 387.1990     | 387.1990    | <sup>1,5</sup> A <sub>2<math>\alpha'</math>, 2<math>\beta</math></sub> <sup>‡</sup> -CH <sub>3</sub> O                                                      | 0.07         | 182706    | 3.7   |
| 1+  | 415.1938     | 415.1939    | <sup>1,5</sup> A <sub>2<math>\alpha'</math>, 2<math>\beta</math></sub> <sup>‡</sup>                                                                         | -0.23        | 1683901   | 32.9  |
| 1+  | 417.2092     | 417.2095    | <sup>1,5</sup> A <sub>2<math>\alpha'</math>, 2<math>\beta</math></sub>                                                                                      | -0.80        | 575774    | 11.2  |
| 1+  | 431.1885     | 431.1888    | C <sub>3</sub> /Z <sub>4<math>\alpha'</math></sub> , C <sub>2<math>\alpha'</math>, 2<math>\beta</math></sub> <sup>*</sup> -CH <sub>3</sub> O                | -0.69        | 4950089   | 95.9  |
| 1+  | 445.2042     | 445.2044    | B <sub>2<math>\alpha'</math>, 2<math>\beta</math></sub>                                                                                                     | -0.54        | 2286658   | 44.0  |
| 1+  | 447.1835     | 447.1837    | C <sub>2<math>\alpha'</math>, 2<math>\beta</math></sub> <sup>*</sup> -CH <sub>3</sub>                                                                       | -0.52        | 1321437   | 25.4  |
| 1+  | 461.1992     | 461.1993    | C <sub>2<math>\alpha'</math>, 2<math>\beta</math></sub> <sup>‡</sup>                                                                                        | -0.38        | 4779982   | 91.8  |
| 1+  | 463.2148     | 463.2150    | C <sub>2<math>\alpha'</math>, 2<math>\beta</math></sub>                                                                                                     | -0.42        | 922451    | 17.7  |
| 1+  | 514.2843     | 514.2845    | Z <sub>2</sub> <sup>*</sup> -CH <sub>3</sub> O                                                                                                              | -0.40        | 2798328   | 51.7  |
| 1+  | 519.2408     | 519.2412    | <sup>1,3</sup> A <sub>3<math>\alpha'</math>, 3<math>\beta</math></sub> , <sup>2,4</sup> A <sub>3<math>\alpha'</math>, 3<math>\beta</math></sub>             | -0.73        | 1162091   | 21.5  |
| 1+  | 544.2951     | 544.2951    | Z <sub>2</sub>                                                                                                                                              | 0.08         | 1385340   | 25.3  |
| 1+  | 562.3036     | 562.3056    | Y <sub>2</sub>                                                                                                                                              | -3.65        | 974837    | 31.9  |
| 1+  | 590.3002     | 590.3005    | <sup>1,5</sup> X <sub>2</sub>                                                                                                                               | -0.54        | 4155918   | 74.7  |
| 1+  | 619.2957     | 619.2936    | <sup>1,5</sup> A <sub>3<math>\beta</math></sub> <sup>‡</sup>                                                                                                | 3.40         | 444997    | 7.9   |
| 1+  | 635.2880     | 635.2885    | C <sub>3<math>\beta</math></sub> <sup>*</sup> -CH <sub>3</sub> O                                                                                            | -0.79        | 1385684   | 24.1  |

|    |           |           |                                         |       |          |       |
|----|-----------|-----------|-----------------------------------------|-------|----------|-------|
| 1+ | 649.3044  | 649.3042  | $B_{3\beta}$                            | 0.24  | 1034927  | 17.6  |
| 1+ | 665.2990  | 665.2991  | $C_{3\beta}^{\ddagger}$                 | -0.13 | 3254318  | 54.3  |
| 2+ | 714.8444  | 714.8444  | $^{1,5}X_{3\alpha}$                     | -0.01 | 220718   | 3.6   |
| 1+ | 734.3791  | 734.3792  | $Y_{3\alpha}/Z_{3\beta}$                | -0.12 | 723462   | 11.8  |
| 1+ | 823.3938  | 823.3934  | $^{1,5}A_{3\alpha}^{\ddagger}$          | 0.44  | 695461   | 10.8  |
| 1+ | 825.4084  | 825.4091  | $^{1,5}A_{3\alpha}$                     | -0.84 | 524790   | 8.1   |
| 1+ | 839.3877  | 839.3883  | $C_4/Z_{3\alpha}$                       | -0.73 | 672004   | 10.1  |
| 1+ | 869.3988  | 869.3989  | $C_{3\alpha}^{\ddagger}$                | -0.12 | 1067850  | 16.0  |
| 2+ | 895.9375  | 895.9415  | $Z_{4\alpha'}, 4\beta$                  | -4.44 | 202285   | 2.9   |
| 1+ | 913.4241  | 913.4251  | $^{0,4}A_4$                             | -1.14 | 712395   | 10.0  |
| 2+ | 918.9432  | 918.9442  | $^{1,5}X_{4\alpha'}, 4\beta$            | -1.06 | 749158   | 10.5  |
| 1+ | 935.4076  | 935.4071  | $^{0,4}A_4 + 2Na - H$                   | 0.54  | 2013621  | 54.5  |
| 1+ | 941.4557  | 941.4564  | $^{3,5}A_4$                             | -0.73 | 747258   | 10.5  |
| 2+ | 1020.9934 | 1020.9941 | $^{1,5}X_{4\alpha'', 5\alpha', 5\beta}$ | -0.67 | 1791974  | 23.6  |
| 2+ | 1035.0087 | 1035.0097 | $^{0,2}X_{4\alpha'', 5\alpha', 5\beta}$ | -0.97 | 265883   | 3.5   |
| 1+ | 1043.4863 | 1043.4881 | $C_4/Z_{3\beta}$                        | -1.75 | 2239479  | 29.5  |
| 2+ | 1116.0535 | 1116.0543 | M                                       | -0.79 | 47181416 | 603.7 |
| 1+ | 1406.6993 | 1406.6996 | $^{1,5}X_{3\alpha}$                     | -0.28 | 545862   | 6.1   |
| 1+ | 1564.7863 | 1564.7939 | $Z_{3\beta}$                            | -4.85 | 186884   | 2.0   |
| 1+ | 1610.7994 | 1610.7994 | $^{1,5}X_{3\beta}$                      | -0.03 | 335178   | 3.5   |
| 1+ | 1685.7959 | 1685.7980 | $C_4^{\ddagger}$                        | -1.21 | 771236   | 7.9   |
| 1+ | 1784.8923 | 1784.8886 | $Y_{4\alpha'}, 4\beta^{\ddagger}$       | 2.07  | 232321   | 2.3   |
| 1+ | 1814.8998 | 1814.8992 | $^{1,5}X_{4\alpha'}, 4\beta$            | 0.32  | 372858   | 3.6   |
| 1+ | 2209.1177 | 2209.1195 | M                                       | -0.82 | 1106030  | 9.8   |



**Table S18.** List of assigned EED fragments in Figure S3c. All fragments are sodium adducts unless labeled otherwise. Multiple assignments are separated by commas;  $\omega$  indicates harmonics; the double dagger symbol ( $\ddagger$ ) indicates that the fragment has two fewer hydrogens than the canonical structures; the double prime symbol ( $''$ ) indicates that the fragment has two more hydrogens than the canonical structure; the dot symbol ( $\cdot$ ) indicates a radical.

| $z$ | Exptl. $m/z$ | Theo. $m/z$ | Assignment                                                                      | $\Delta$ ppm | Intensity | $S/N$ |
|-----|--------------|-------------|---------------------------------------------------------------------------------|--------------|-----------|-------|
| 1+  | 211.0940     | 211.0941    | $B_1\cdot$ -CH <sub>3</sub> O                                                   | -0.54        | 2736254   | 52.4  |
| 1+  | 227.0889     | 227.0890    | $C_1\cdot$ -CH <sub>3</sub> O                                                   | -0.46        | 8382834   | 157.7 |
| 1+  | 241.1045     | 241.1046    | $B_1$                                                                           | -0.43        | 1194601   | 45.3  |
| 1+  | 243.0839     | 243.0839    | $C_1\cdot$ -CH <sub>3</sub> , $C_{2\beta}$ , $2\alpha''/Y_{5\beta}$ , $5\alpha$ | -0.24        | 5653985   | 107.8 |
| 1+  | 269.1581     | 269.1582    | $Z_1\cdot$ -CH <sub>3</sub> O                                                   | -0.20        | 3296951   | 60.2  |
| 1+  | 285.1530     | 285.1531    | $Z_1\cdot$ -CH <sub>3</sub>                                                     | -0.36        | 1694535   | 30.4  |
| 1+  | 299.1688     | 299.1687    | $Z_1$                                                                           | 0.02         | 2823748   | 50.6  |
| 1+  | 315.1414     | 315.1414    | $^{1,3}A_{2\beta}$ , $2\alpha'$ , $^{2,4}A_{2\beta}$ , $2\alpha'$               | 0.05         | 1895840   | 33.6  |
| 1+  | 315.1636     | 315.1637    | $Y_1\ddagger$                                                                   | -0.19        | 1137135   | 20.1  |
| 1+  | 317.1793     | 317.1793    | $Y_1$                                                                           | 0.07         | 13827026  | 245.0 |
| 1+  | 345.1743     | 345.1742    | $^{1,5}X_1$                                                                     | 0.14         | 5157770   | 87.6  |
| 1+  | 385.1832     | 385.1833    | $B_{2\alpha'}, 2\beta\cdot$ -C <sub>2</sub> H <sub>5</sub> O <sub>2</sub>       | -0.20        | 2949895   | 48.9  |
| 1+  | 401.1781     | 401.1781    | $C_{2\alpha'}, 2\beta\cdot$ -C <sub>2</sub> H <sub>5</sub> O <sub>2</sub>       | 0.02         | 1651135   | 27.3  |
| 1+  | 415.1937     | 415.1939    | $^{1,5}A_{2\alpha'}, 2\beta\ddagger$                                            | -0.42        | 4750704   | 77.7  |
| 1+  | 417.1730     | 417.1732    | $C_{2\alpha'}, 2\beta\cdot$ -C <sub>2</sub> H <sub>5</sub> O                    | -0.49        | 1392257   | 22.8  |
| 1+  | 417.2095     | 417.2095    | $^{1,5}A_{2\alpha'}, 2\beta$                                                    | -0.06        | 1467013   | 24.0  |
| 1+  | 431.1887     | 431.1888    | $C_{2\alpha'}, 2\beta\cdot$ -CH <sub>3</sub> O                                  | -0.27        | 9150847   | 148.0 |
| 1+  | 445.2046     | 445.2044    | $B_{2\alpha'}, 2\beta$                                                          | 0.32         | 6334171   | 101.8 |
| 1+  | 447.1837     | 447.1837    | $C_{2\alpha'}, 2\beta\cdot$ -CH <sub>3</sub>                                    | -0.07        | 2818300   | 45.3  |
| 1+  | 461.1991     | 461.1993    | $C_{2\alpha'}, 2\beta\ddagger$                                                  | -0.61        | 12970280  | 205.8 |
| 1+  | 463.2150     | 463.2150    | $C_{2\alpha'}, 2\beta$                                                          | -0.05        | 3058270   | 47.9  |
| 1+  | 500.2689     | 500.2688    | $Z_2\cdot$ -C <sub>2</sub> H <sub>5</sub> O                                     | 0.20         | 2179184   | 32.5  |
| 1+  | 505.2254     | 505.2256    | $^{0,4}A_{3\alpha'}$                                                            | -0.24        | 6357461   | 94.9  |
| 1+  | 514.2846     | 514.2845    | $Z_2\cdot$ -CH <sub>3</sub> O                                                   | 0.07         | 10161803  | 149.1 |
| 1+  | 519.2411     | 519.2412    | $^{1,3}A_{3\beta}$ , $^{2,4}A_{3\beta}$                                         | -0.11        | 2089811   | 30.7  |
| 1+  | 527.2075     | 527.2076    | $^{0,4}A_{3\alpha'} + 2Na - H$                                                  | -0.12        | 8333980   | 286.0 |
| 1+  | 530.2795     | 530.2794    | $Z_2\cdot$ -CH <sub>3</sub>                                                     | 0.10         | 2067467   | 29.8  |
| 1+  | 533.2568     | 533.2568    | $^{3,5}A_{3\alpha'}$                                                            | -0.01        | 4069541   | 58.6  |
| 1+  | 544.2952     | 544.2951    | $Z_2$                                                                           | 0.21         | 5086288   | 72.3  |

|    |           |           |                                                     |       |          |         |
|----|-----------|-----------|-----------------------------------------------------|-------|----------|---------|
| 1+ | 547.2364  | 547.2361  | ${}^{0,3}A_{3\beta}^{\ddagger}$                     | 0.58  | 624701   | 8.9     |
| 1+ | 558.2748  | 558.2743  | $\omega_2$                                          | 0.76  | 28846362 | 411.3   |
| 1+ | 561.2520  | 561.2518  | ${}^{1,4}A_{3\beta}^{\ddagger}$                     | 0.33  | 609264   | 8.7     |
| 1+ | 562.3058  | 562.3056  | $Y_2$                                               | 0.21  | 2479423  | 35.3    |
| 1+ | 590.3007  | 590.3005  | ${}^{1,5}X_2$                                       | 0.33  | 12789314 | 184.1   |
| 1+ | 605.2783  | 605.2779  | $C_{3\beta}^{\bullet}-C_2H_5O_2$                    | 0.72  | 1351642  | 19.5    |
| 1+ | 619.2941  | 619.2936  | ${}^{1,5}A_{3\beta}^{\ddagger}$                     | 0.80  | 1174887  | 17.0    |
| 1+ | 621.2729  | 621.2730  | $C_{3\beta}^{\bullet}-C_2H_5O$                      | -0.08 | 1111185  | 16.0    |
| 1+ | 621.3094  | 621.3093  | ${}^{1,5}A_{3\beta}$                                | 0.12  | 652502   | 9.4     |
| 1+ | 635.2886  | 635.2885  | $C_{3\beta}^{\bullet}-CH_3O$                        | 0.08  | 7259794  | 104.0   |
| 1+ | 649.3042  | 649.3042  | $B_{3\beta}$                                        | 0.06  | 2872247  | 40.6    |
| 1+ | 665.2997  | 665.2991  | $C_{3\beta}^{\ddagger}$                             | 0.83  | 11991463 | 166.2   |
| 1+ | 667.3147  | 667.3148  | $C_{3\beta}$                                        | -0.16 | 1735094  | 24.1    |
| 1+ | 723.3412  | 723.3410  | ${}^{1,3}A_4, {}^{2,4}A_4$                          | 0.29  | 1197338  | 17.1    |
| 1+ | 734.3795  | 734.3792  | $Y_{3\alpha}/Z_{3\beta}$                            | 0.37  | 2792346  | 37.2    |
| 1+ | 809.3777  | 809.3777  | $C_{3\alpha}^{\bullet}-C_2H_5O_2$                   | -0.01 | 689129   | 8.1     |
| 2+ | 816.8946  | 816.8943  | ${}^{1,5}X_{3\beta}$                                | 0.32  | 724653   | 8.5     |
| 1+ | 823.3895  | 823.3934  | ${}^{1,5}A_{3\alpha}^{\ddagger}$                    | -4.77 | 1153224  | 13.6    |
| 1+ | 825.4096  | 825.4091  | ${}^{1,5}A_{3\alpha}$                               | 0.69  | 1533326  | 18.1    |
| 2+ | 854.3937  | 854.3936  | $C_4^{\ddagger}$                                    | 0.14  | 5871521  | 126.7   |
| 1+ | 869.3987  | 869.3989  | $C_{3\alpha}^{\ddagger}$                            | -0.24 | 2932887  | 32.5    |
| 1+ | 871.4155  | 871.4145  | $C_{3\alpha}$                                       | 1.07  | 1626028  | 16.5    |
| 2+ | 895.9375  | 895.9415  | $Z_{4\alpha'}, {}_{4\beta}$                         | -4.46 | 660667   | 6.7     |
| 1+ | 913.4252  | 913.4251  | ${}^{0,4}A_4$                                       | 0.11  | 3752538  | 35.4    |
| 2+ | 918.9443  | 918.9442  | ${}^{1,5}X_{4\alpha'}, {}_{4\beta}$                 | 0.10  | 3558203  | 33.6    |
| 1+ | 935.4072  | 935.4071  | ${}^{0,4}A_4 + 2Na - H$                             | 0.11  | 6760764  | 101.8   |
| 1+ | 941.4568  | 941.4564  | ${}^{3,5}A_4$                                       | 0.44  | 3754988  | 35.5    |
| 2+ | 997.9926  | 997.9914  | $Z_{4\alpha'"}, {}_{5\alpha'}, {}_{5\beta}$         | 1.26  | 2670706  | 24.1    |
| 2+ | 1020.9940 | 1020.9941 | ${}^{1,5}X_{4\alpha'"}, {}_{5\alpha'}, {}_{5\beta}$ | -0.09 | 9010826  | 78.8    |
| 2+ | 1035.0089 | 1035.0097 | ${}^{0,2}X_{4\alpha'"}, {}_{5\alpha'}, {}_{5\beta}$ | -0.83 | 699422   | 6.1     |
| 1+ | 1043.4878 | 1043.4881 | $C_4/Z_{3\beta}$                                    | -0.27 | 8783704  | 63.6    |
| 2+ | 1050.0154 | 1050.0150 | ${}^{1,4}X_{4\alpha'"}, {}_{5\alpha'}, {}_{5\beta}$ | 0.38  | 797132   | 7.0     |
| 2+ | 1116.0565 | 1116.0543 | M                                                   | 1.89  | 4.33E+09 | 38003.3 |
| 1+ | 1376.6910 | 1376.6891 | $Y_{3\alpha}^{\ddagger}$                            | 1.41  | 946551   | 8.5     |

|    |           |           |                                            |       |         |      |
|----|-----------|-----------|--------------------------------------------|-------|---------|------|
| 1+ | 1406.7006 | 1406.6996 | $^{1,5}\chi_{3\alpha}$                     | 0.68  | 2699346 | 24.3 |
| 1+ | 1534.7850 | 1534.7834 | $Z_{3\beta}^{\bullet}-CH_3O$               | 1.04  | 1369255 | 12.0 |
| 1+ | 1550.7758 | 1550.7783 | $Z_{3\beta}^{\bullet}-CH_3$                | -1.63 | 1228545 | 10.8 |
| 1+ | 1564.7935 | 1564.7939 | $Z_{3\beta}$                               | -0.30 | 1355794 | 11.5 |
| 1+ | 1580.7904 | 1580.7888 | $Y_{3\beta}^{\ddagger}$                    | 0.99  | 1078214 | 9.2  |
| 1+ | 1610.7991 | 1610.7994 | $^{1,5}\chi_{3\beta}$                      | -0.18 | 2216270 | 18.9 |
| 1+ | 1641.8100 | 1641.8081 | $^{1,5}A_4$                                | 1.15  | 972209  | 8.3  |
| 1+ | 1685.7997 | 1685.7980 | $C_4^{\ddagger}$                           | 1.02  | 3680153 | 31.3 |
| 1+ | 1738.8846 | 1738.8832 | $Z_{4\alpha', 4\beta}^{\bullet}-CH_3O$     | 0.84  | 531728  | 4.3  |
| 1+ | 1754.8820 | 1754.8781 | $Z_{4\alpha', 4\beta}^{\bullet}-CH_3$      | 2.22  | 1335990 | 10.9 |
| 1+ | 1768.8957 | 1768.8937 | $Z_{4\alpha', 4\beta}$                     | 1.10  | 693677  | 5.6  |
| 1+ | 1814.8982 | 1814.8992 | $^{1,5}\chi_{4\alpha', 4\beta}$            | -0.55 | 1725800 | 14.0 |
| 1+ | 1914.9295 | 1914.9294 | $B_5$                                      | 0.08  | 1157007 | 9.0  |
| 1+ | 2019.0003 | 2018.9990 | $^{1,5}\chi_{4\alpha'', 5\alpha', 5\beta}$ | 0.68  | 892994  | 6.9  |
| 1+ | 2177.0998 | 2177.0933 | $M-CH_4O$                                  | 2.98  | 631411  | 4.8  |
| 1+ | 2209.1230 | 2209.1195 | $M$                                        | 1.61  | 4699603 | 35.5 |

**Table S19.** List of assigned EED fragments in Figure S4. All fragments are sodium adducts unless labeled otherwise. Multiple assignments are separated by commas;  $\omega$  indicates harmonics; the double dagger symbol ( $\ddagger$ ) indicates that the fragment has two fewer hydrogens than the canonical structures; the double prime symbol ( $''$ ) indicates that the fragment has two more hydrogens than the canonical structure; the dot symbol ( $\cdot$ ) indicates a radical.

| <b>z</b> | <b>Exptl. m/z</b> | <b>Theo. m/z</b> | <b>Assignment</b>                                                                                                                                                         | <b><math>\Delta</math>ppm</b> | <b>Intensity</b> | <b>S/N</b> |
|----------|-------------------|------------------|---------------------------------------------------------------------------------------------------------------------------------------------------------------------------|-------------------------------|------------------|------------|
| 1+       | 211.0941          | 211.0941         | $B_1\cdot$ -CH <sub>3</sub> O                                                                                                                                             | 0.02                          | 3647079          | 83.0       |
| 1+       | 227.0890          | 227.0890         | $C_1\cdot$ -CH <sub>3</sub> O                                                                                                                                             | -0.02                         | 9420735          | 211.8      |
| 1+       | 241.1046          | 241.1046         | B <sub>1</sub>                                                                                                                                                            | -0.10                         | 999653           | 22.2       |
| 1+       | 243.0839          | 243.0839         | C <sup>†</sup> /Y (Hex)                                                                                                                                                   | -0.04                         | 7825140          | 173.9      |
| 1+       | 255.1430          | 255.1424         | Z <sub>1</sub> <sup>†</sup> -C <sub>2</sub> H <sub>5</sub> O                                                                                                              | 2.36                          | 242908           | 5.3        |
| 1+       | 257.0996          | 257.0996         | C <sub>1</sub> <sup>‡</sup>                                                                                                                                               | 0.04                          | 1943497          | 42.8       |
| 1+       | 269.1582          | 269.1582         | Z <sub>1</sub> <sup>•</sup> -CH <sub>3</sub> O                                                                                                                            | -0.13                         | 2827002          | 61.6       |
| 1+       | 315.1636          | 315.1637         | Y <sub>1</sub> <sup>‡</sup>                                                                                                                                               | -0.34                         | 1001436          | 21.7       |
| 1+       | 317.1792          | 317.1793         | Y <sub>1</sub>                                                                                                                                                            | -0.28                         | 10089101         | 219.0      |
| 1+       | 345.1741          | 345.1742         | <sup>1,5</sup> X <sub>1</sub>                                                                                                                                             | -0.44                         | 3811638          | 81.9       |
| 1+       | 357.1518          | 357.1520         | <sup>1,4</sup> A <sub>2</sub> <sup>‡</sup>                                                                                                                                | -0.56                         | 260764           | 5.6        |
| 1+       | 371.1673          | 371.1676         | B <sub>2<math>\beta</math></sub> / <sup>0,4</sup> X <sub>5<math>\beta</math></sub>                                                                                        | -0.81                         | 1014506          | 21.3       |
| 1+       | 385.1831          | 385.1833         | B <sub>2</sub> <sup>•</sup> -C <sub>2</sub> H <sub>5</sub> O <sub>2</sub>                                                                                                 | -0.57                         | 2259531          | 46.5       |
| 1+       | 401.1779          | 401.1781         | C <sub>2</sub> <sup>•</sup> -C <sub>2</sub> H <sub>5</sub> O <sub>2</sub>                                                                                                 | -0.63                         | 1240838          | 24.9       |
| 1+       | 414.2321          | 414.2321         | <sup>0,2</sup> X <sub>1</sub>                                                                                                                                             | -0.05                         | 414033           | 8.1        |
| 1+       | 415.1936          | 415.1939         | <sup>1,5</sup> A <sub>2</sub> <sup>‡</sup>                                                                                                                                | -0.54                         | 3596688          | 70.6       |
| 1+       | 417.1729          | 417.1732         | C <sub>2</sub> <sup>•</sup> -C <sub>2</sub> H <sub>5</sub> O                                                                                                              | -0.77                         | 1218533          | 23.9       |
| 1+       | 417.2093          | 417.2095         | <sup>1,5</sup> A <sub>2</sub>                                                                                                                                             | -0.56                         | 1151033          | 22.6       |
| 1+       | 431.1884          | 431.1888         | C <sub>2</sub> <sup>•</sup> -CH <sub>3</sub> O                                                                                                                            | -0.78                         | 8735882          | 170.8      |
| 1+       | 445.2041          | 445.2044         | B <sub>2</sub>                                                                                                                                                            | -0.72                         | 6623371          | 128.4      |
| 1+       | 447.1834          | 447.1837         | C <sub>2</sub> <sup>•</sup> -CH <sub>3</sub>                                                                                                                              | -0.74                         | 1956346          | 37.9       |
| 1+       | 461.1990          | 461.1993         | C <sub>2</sub> <sup>‡</sup>                                                                                                                                               | -0.81                         | 14978026         | 290.0      |
| 1+       | 463.2145          | 463.2150         | C <sub>2</sub>                                                                                                                                                            | -0.98                         | 3993569          | 77.0       |
| 1+       | 502.2841          | 502.2845         | Z <sub>2</sub> <sup>•</sup> -Ac                                                                                                                                           | -0.88                         | 3529647          | 66.1       |
| 1+       | 505.2252          | 505.2256         | <sup>0,4</sup> A <sub>3<math>\alpha'</math></sub>                                                                                                                         | -0.64                         | 4247609          | 79.6       |
| 1+       | 514.2842          | 514.2845         | Z <sub>2</sub> <sup>•</sup> -CH <sub>3</sub> O                                                                                                                            | -0.63                         | 7988247          | 147.4      |
| 1+       | 519.2408          | 519.2412         | <sup>1,3</sup> A <sub>3<math>\beta</math></sub> , <sup>3<math>\alpha''</math></sup> , <sup>2,4</sup> A <sub>3<math>\beta</math></sub> , <sup>3<math>\alpha''</math></sup> | -0.79                         | 2532358          | 46.7       |
| 1+       | 527.2069          | 527.2076         | <sup>0,4</sup> A <sub>3<math>\alpha'</math></sub> + 2Na - H                                                                                                               | -1.26                         | 5611797          | 102.2      |
| 1+       | 530.2790          | 530.2794         | Z <sub>2</sub> <sup>•</sup> -CH <sub>3</sub>                                                                                                                              | -0.88                         | 1400536          | 25.5       |

|    |           |           |                                                         |       |          |       |
|----|-----------|-----------|---------------------------------------------------------|-------|----------|-------|
| 1+ | 533.2565  | 533.2568  | $^{3,5}A_{3\alpha'}$                                    | -0.58 | 3397186  | 61.9  |
| 1+ | 544.2951  | 544.2951  | $Z_2$                                                   | 0.04  | 4588140  | 82.6  |
| 1+ | 549.2519  | 549.2518  | $^{0,3}A_{3\beta, 3\alpha''}$                           | 0.27  | 310392   | 5.6   |
| 1+ | 560.2897  | 560.2900  | $Y_2^\ddagger$                                          | -0.48 | 609434   | 10.9  |
| 1+ | 561.2520  | 561.2518  | $^{1,4}A_{3\beta, 3\alpha''}^\ddagger$                  | 0.42  | 537990   | 9.6   |
| 1+ | 562.3051  | 562.3056  | $Y_2$                                                   | -0.91 | 1498814  | 26.9  |
| 1+ | 575.2669  | 575.2674  | $B_{3\beta}/^{0,4}X_{5\beta}$                           | -0.96 | 1015965  | 18.1  |
| 1+ | 583.2339  | 583.2338  | $^{1,4}A_{3\beta, 3\alpha''}^\ddagger + 2Na - H$        | 0.24  | 5636337  | 100.4 |
| 1+ | 590.3001  | 590.3005  | $^{1,5}X_2$                                             | -0.70 | 10244614 | 181.9 |
| 1+ | 605.2781  | 605.2779  | $C_{3\beta}^\bullet - C_2H_5O_2$                        | 0.37  | 835465   | 14.8  |
| 1+ | 618.3314  | 618.3318  | $^{0,2}X_2$                                             | -0.66 | 543244   | 9.5   |
| 1+ | 619.2936  | 619.2936  | $^{1,5}A_{3\beta}^\ddagger$                             | -0.01 | 889748   | 15.6  |
| 1+ | 621.2726  | 621.2730  | $C_{3\beta}^\bullet - C_2H_5O$                          | -0.62 | 852442   | 15.0  |
| 1+ | 621.3088  | 621.3093  | $^{1,5}A_{3\beta}$                                      | -0.74 | 810002   | 14.2  |
| 1+ | 635.2881  | 635.2885  | $C_{3\beta}^\bullet - CH_3O, C_{3\alpha}/Z_{4\alpha''}$ | -0.73 | 6106029  | 105.9 |
| 1+ | 649.3041  | 649.3042  | $B_{3\beta}$                                            | -0.20 | 1830995  | 31.5  |
| 1+ | 665.2991  | 665.2991  | $C_{3\beta}^\ddagger$                                   | 0.05  | 10571215 | 179.1 |
| 2+ | 714.8445  | 714.8444  | $^{1,5}X_{3\alpha}$                                     | 0.15  | 241174   | 4.0   |
| 1+ | 723.3406  | 723.3410  | $^{1,3}A_{4\beta}, ^{2,4}A_{4\beta}$                    | -0.57 | 934089   | 14.8  |
| 1+ | 734.3788  | 734.3792  | $Y_{3\alpha}/Z_{3\beta}$                                | -0.57 | 1925128  | 31.9  |
| 1+ | 883.3780  | 883.3781  | $C_4/^{1,5}X_{3\alpha}$                                 | -0.21 | 1189084  | 16.9  |
| 2+ | 918.9438  | 918.9442  | $^{1,5}X_{3\beta}$                                      | -0.47 | 264525   | 3.6   |
| 2+ | 956.4416  | 956.4435  | $C_4^\ddagger$                                          | -1.94 | 3425791  | 42.9  |
| 2+ | 990.9814  | 990.9835  | $Y_{5\alpha'}/Z_{5\alpha''}$                            | -2.16 | 1616237  | 20.8  |
| 2+ | 997.9895  | 997.9914  | $Z_{4\alpha'', 4\alpha', 4\beta}$                       | -1.85 | 1482969  | 19.1  |
| 2+ | 1020.9933 | 1020.9941 | $^{1,5}X_{4\alpha'', 4\alpha', 4\beta}$                 | -0.75 | 4633435  | 56.7  |
| 2+ | 1027.4895 | 1027.4932 | $^{1,5}A_{3\alpha}^\ddagger$                            | -3.62 | 552934   | 6.8   |
| 1+ | 1029.5087 | 1029.5088 | $^{1,5}A_{3\alpha}$                                     | -0.16 | 1512995  | 18.5  |
| 1+ | 1073.4995 | 1073.4987 | $C_{3\alpha}$                                           | 0.77  | 1337201  | 15.8  |
| 2+ | 1079.0023 | 1079.0067 | $C_5^\ddagger$                                          | -4.08 | 1323761  | 15.2  |
| 2+ | 1100.0429 | 1100.0412 | $Z_{5\alpha'', 5\alpha', 5\beta}$                       | 1.55  | 1537338  | 18.2  |
| 1+ | 1117.5238 | 1117.5249 | $^{0,4}A_4$                                             | -0.94 | 1484645  | 17.5  |
| 2+ | 1123.0434 | 1123.0440 | $^{1,5}X_{5\alpha'', 5\alpha', 5\beta}$                 | -0.49 | 6029031  | 68.9  |
| 2+ | 1137.0599 | 1137.0596 | $^{0,2}X_{5\alpha'', 5\alpha', 5\beta}$                 | 0.21  | 704621   | 8.1   |

|    |           |           |                                             |       |          |         |
|----|-----------|-----------|---------------------------------------------|-------|----------|---------|
| 1+ | 1139.5061 | 1139.5069 | $^{0,4}A_4 + 2Na - H$                       | -0.70 | 4222158  | 48.3    |
| 1+ | 1145.5555 | 1145.5562 | $^{3,5}A_4$                                 | -0.59 | 2437099  | 44.8    |
| 2+ | 1152.0651 | 1152.0649 | $^{1,4}X_{5\alpha'', 5\alpha', 5\beta}$     | 0.15  | 510719   | 5.8     |
| 2+ | 1218.1026 | 1218.1042 | M                                           | -1.31 | 9.19E+08 | 10338.0 |
| 1+ | 1247.5878 | 1247.5879 | $C_4/Z_{3\beta}$                            | -0.08 | 5014663  | 56.4    |
| 1+ | 1330.6839 | 1330.6836 | $Z_{3\alpha}^* - CH_3O$                     | 0.21  | 289645   | 3.2     |
| 1+ | 1360.6945 | 1360.6942 | $Z_{3\alpha}$                               | 0.28  | 392133   | 4.3     |
| 1+ | 1376.6912 | 1376.6891 | $Y_{3\alpha}^\ddagger$                      | 1.54  | 558750   | 6.1     |
| 1+ | 1406.6999 | 1406.6996 | $^{1,5}X_{3\alpha}$                         | 0.16  | 2620864  | 28.7    |
| 1+ | 1738.8876 | 1738.8832 | $Z_{3\beta}^* - CH_3O$                      | 2.55  | 602888   | 5.9     |
| 1+ | 1754.8772 | 1754.8781 | $Z_{3\beta}^* - CH_3$                       | -0.51 | 631958   | 6.2     |
| 1+ | 1768.8997 | 1768.8937 | $Z_{3\beta}$                                | 3.38  | 622931   | 6.1     |
| 1+ | 1784.8903 | 1784.8886 | $Y_{3\beta}^\ddagger$                       | 0.92  | 565285   | 5.5     |
| 1+ | 1814.8988 | 1814.8992 | $^{1,5}X_{3\beta}$                          | -0.24 | 1181069  | 11.6    |
| 1+ | 1845.9088 | 1845.9079 | $^{1,5}A_4$                                 | 0.47  | 470221   | 4.6     |
| 1+ | 1889.8974 | 1889.8977 | $C_4^\ddagger$                              | -0.18 | 2321093  | 21.6    |
| 1+ | 1942.9856 | 1942.9829 | $Z_{4\alpha'', 4\alpha', 4\beta}^* - CH_3O$ | 1.37  | 533793   | 5.0     |
| 1+ | 1972.9975 | 1972.9935 | $Z_{4\alpha'', 4\alpha', 4\beta}^*$         | 2.06  | 546748   | 5.1     |
| 1+ | 2019.0024 | 2018.9990 | $^{1,5}X_{4\alpha'', 4\alpha', 4\beta}$     | 1.68  | 968409   | 9.0     |
| 1+ | 2119.0256 | 2119.0292 | $B_5$                                       | -1.67 | 500142   | 4.5     |
| 1+ | 2367.1813 | 2367.1774 | $M - C_2H_6O$                               | 1.61  | 292280   | 2.6     |
| 2+ | 2381.1853 | 2381.1930 | $M - CH_4O$                                 | -3.24 | 337848   | 3.0     |
| 1+ | 2413.2214 | 2413.2192 | M                                           | 0.91  | 3693304  | 32.4    |

(1) Hong, P.; Sun, H.; Sha, L.; Pu, Y.; Khatri, K.; Yu, X.; Tang, Y.; Lin, C. GlycoDeNovo—an Efficient Algorithm for Accurate de novo Glycan Topology Reconstruction from Tandem Mass Spectra *J. Am. Soc. Mass. Spectrom.* **2017**, *28*, 2288-2301.
